# Supplementary material for: Uncovering Pathways Highly Correlated to NUE through a Combined Metabolomics and Transcriptomics Approach in Eggplant
Source: MDPI journal article supplement (doi:10.3390/plants11050700), 2022-03-04

**Figure S1.** Interactive visualization system and detailed results from the pathway analysis in shoot are presented graphically for AM222, 67-3 and 305E40 vs. AM22: A) and B) to T0; C), D) and E) to T1; F), G), and H) to T2. Paths with FDR <0.05 and with a higher Impact value were highlighted. A P-value of less than 0.05, 0.01, and 0.001 was designated with one (\*), two (\*\*) or three (\*\*\*) asterisks, respectively.

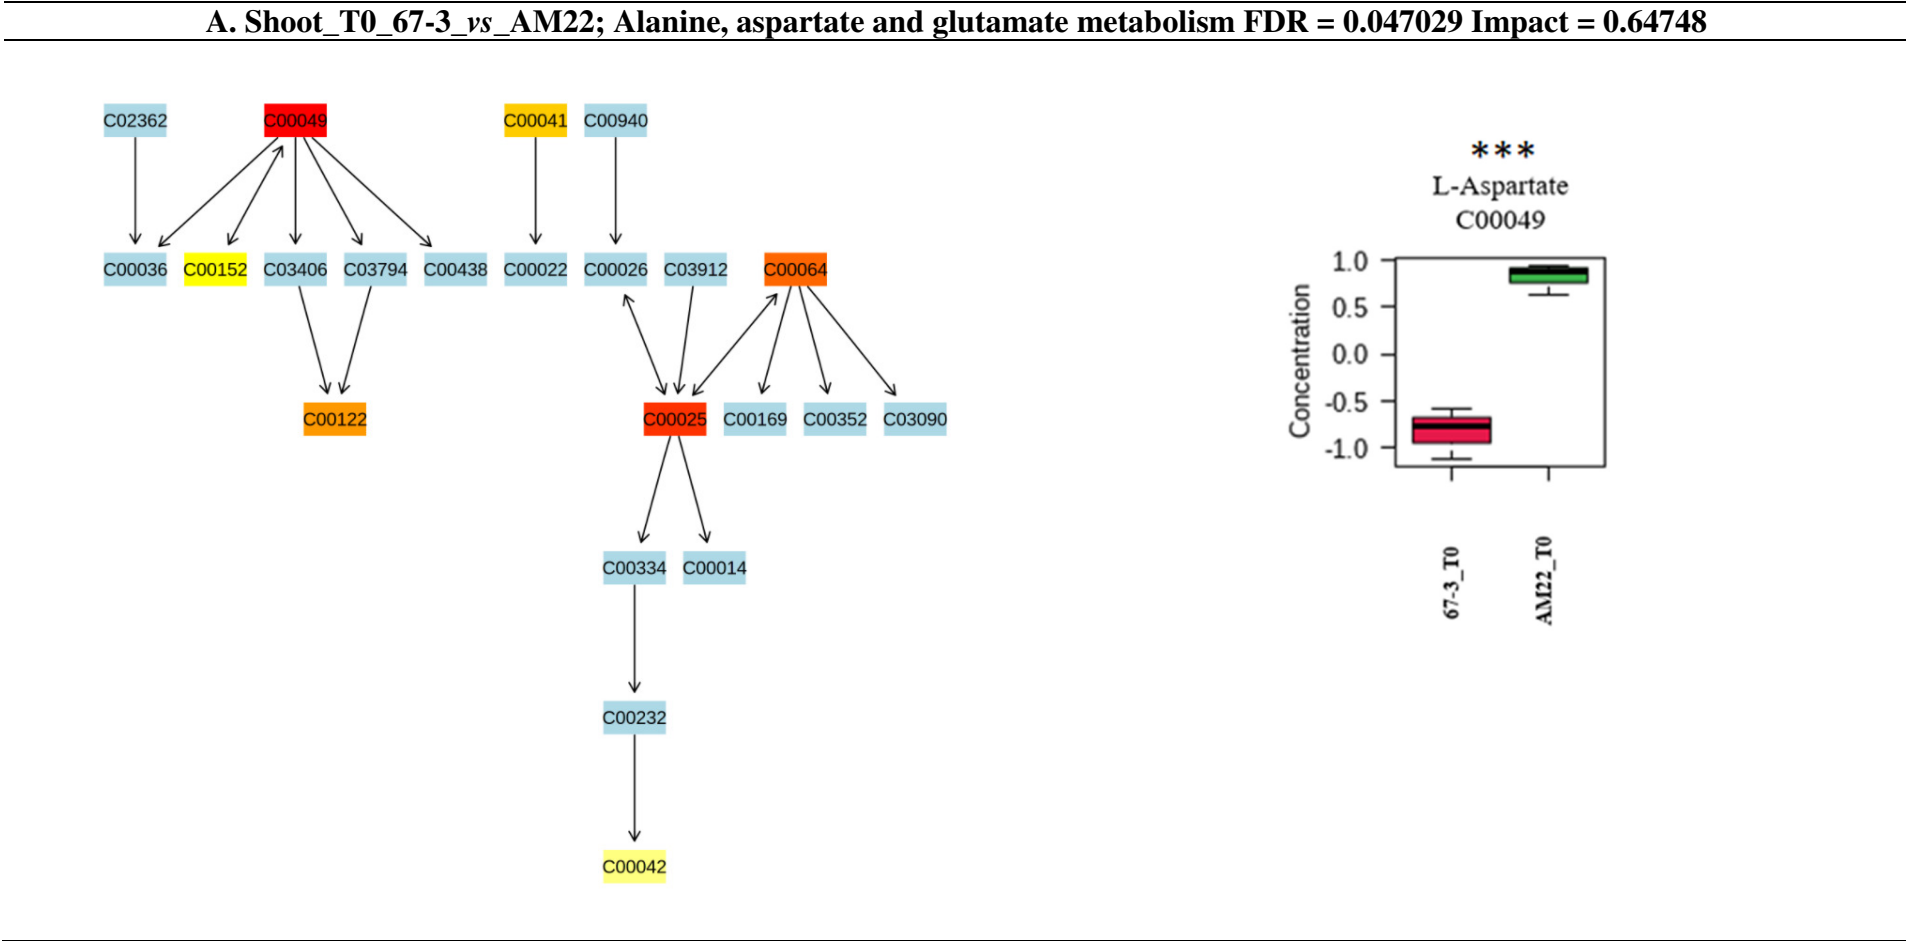

---

**B. Shoot\_T0\_305E40\_vs\_AM22; Alanine, aspartate and glutamate metabolism FDR = 0.0094 Impact = 0.64748**

---

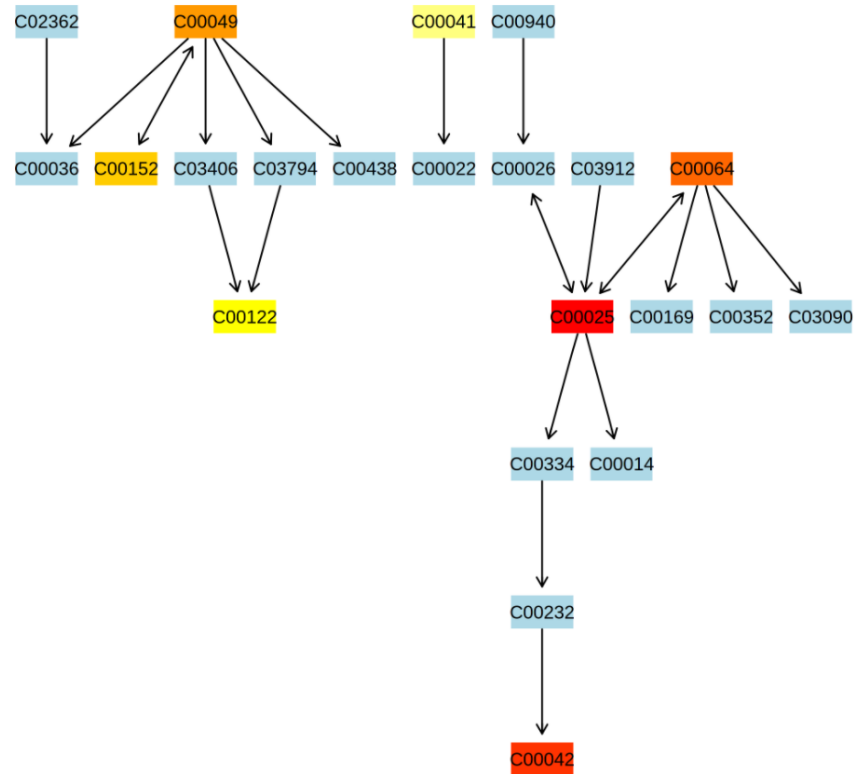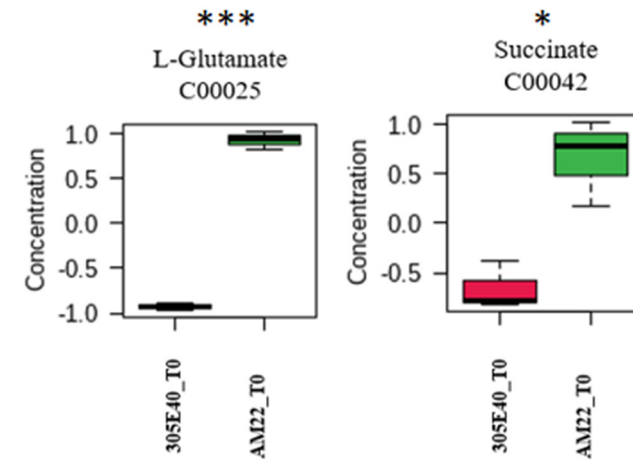

---

**C. Shoot\_T1\_AM222\_vs\_AM22; Alanine, aspartate and glutamate metabolism FDR = 0.010616 Impact = 0.64748**

---

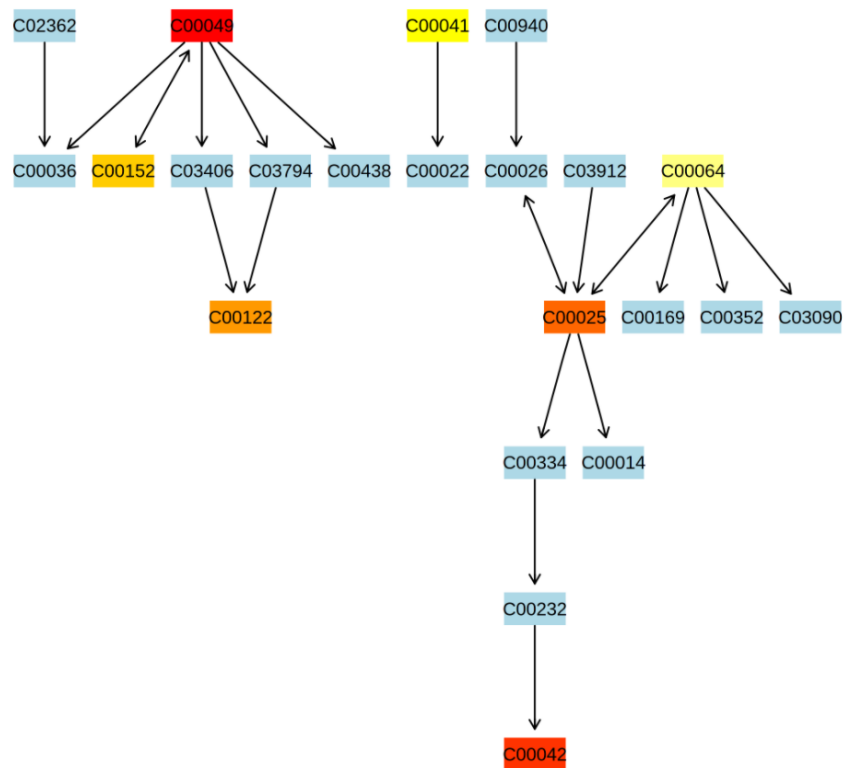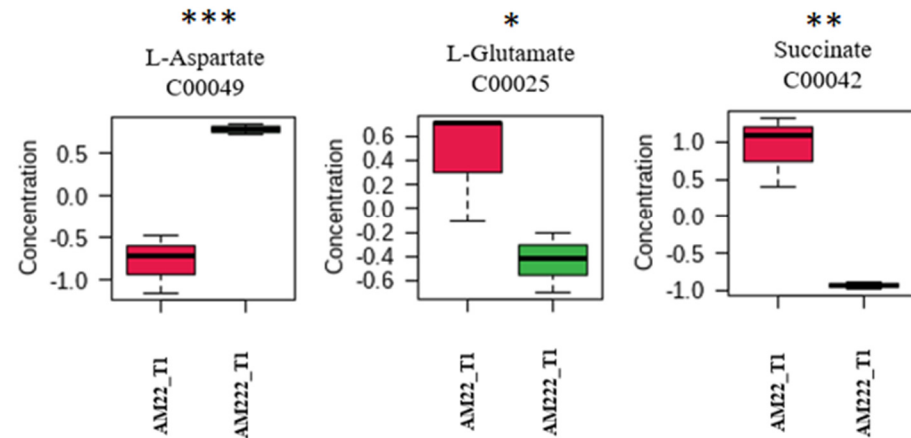

---

**D. Shoot\_T1\_67-3\_vs\_AM22; Alanine, aspartate and glutamate metabolism FDR = 0.00020894 Impact = 0.64748**

---

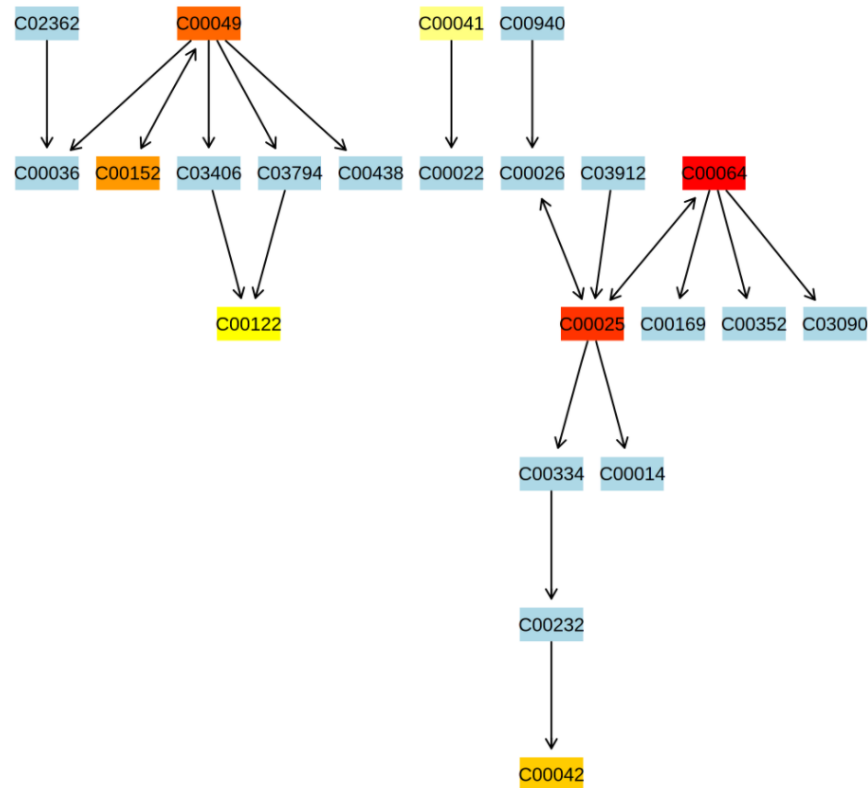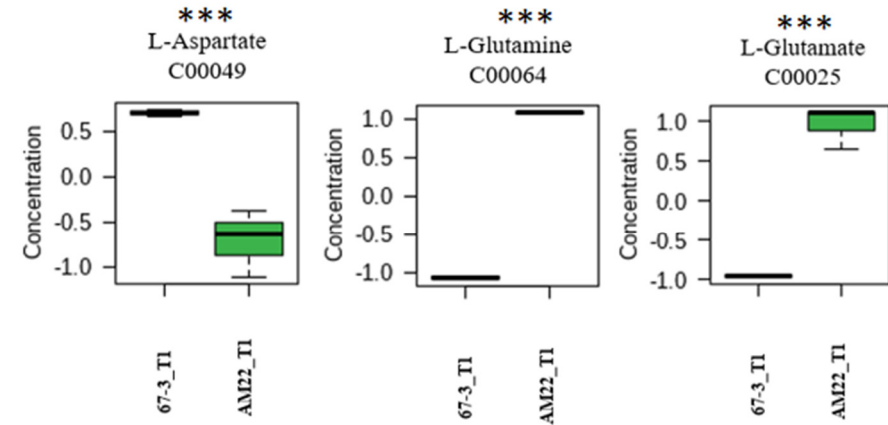

---

**E. Shoot\_T1\_305E40\_vs\_AM22; Alanine, aspartate and glutamate metabolism FDR = 0.00029036 Impact = 0.64748**

---

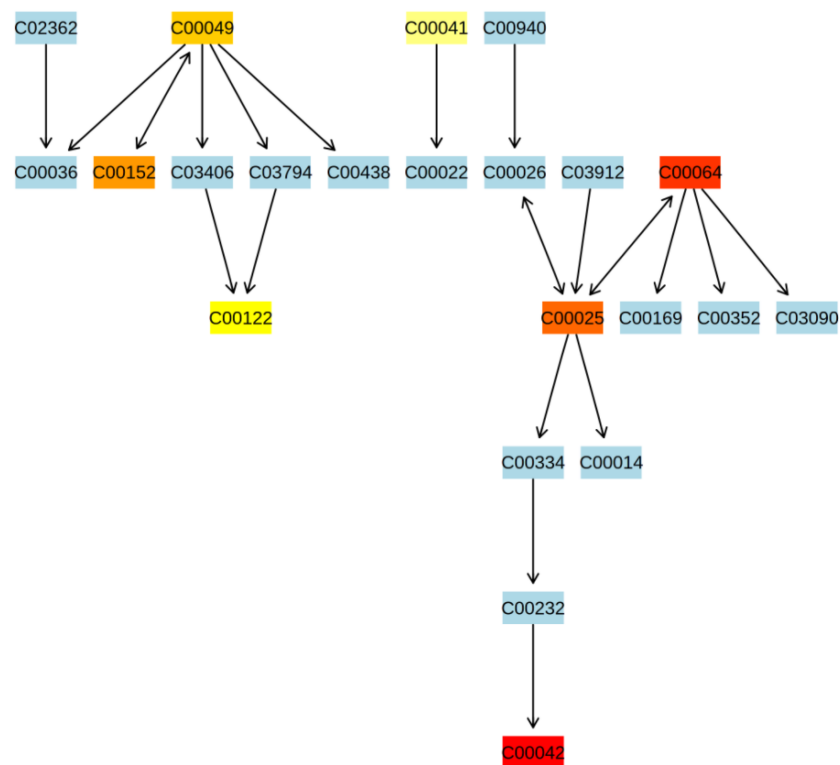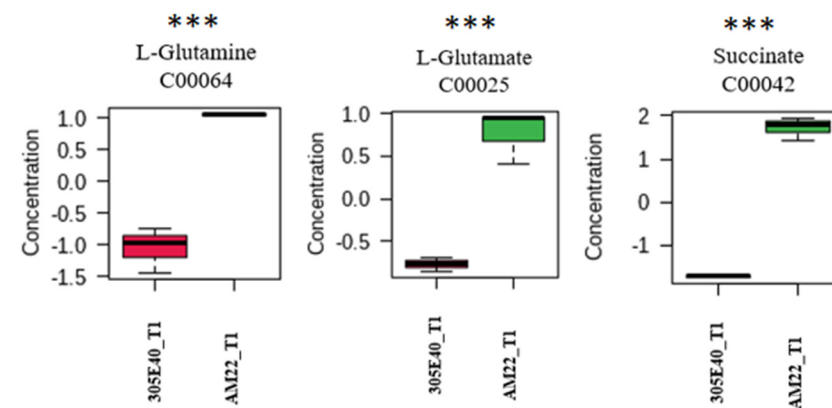

---

**F. Shoot\_T2\_AM222\_vs\_AM22; Glyoxylate and dicarboxylate metabolism FDR = 0.018191 Impact = 0.28209**

---

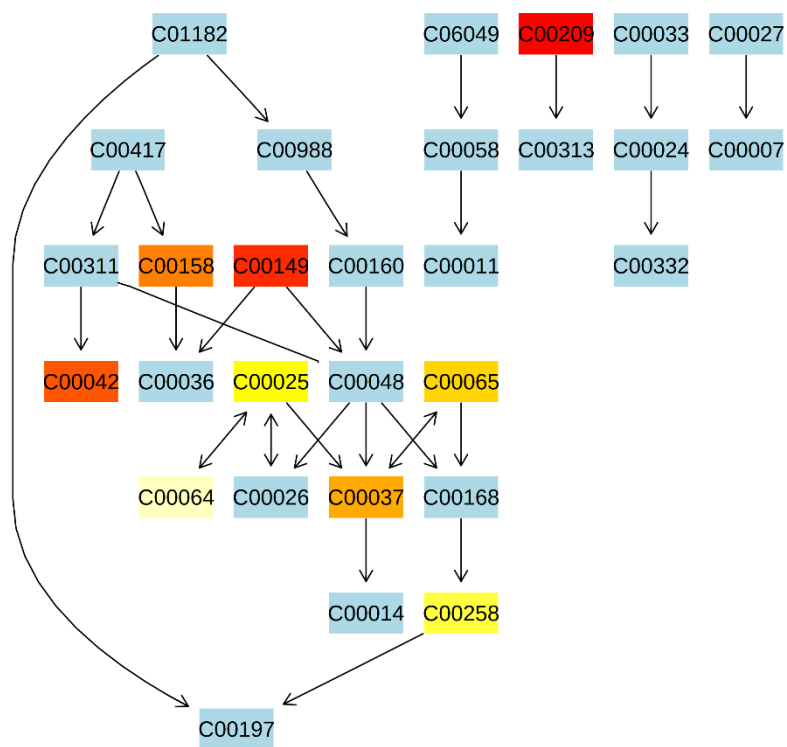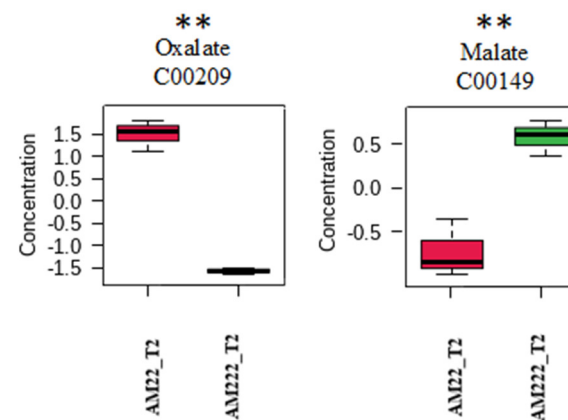

---

**G. Shoot\_T2\_67-3\_vs\_AM22; Alanine, aspartate and glutamate metabolism FDR = 0.0032463 Impact = 0.64748**

---

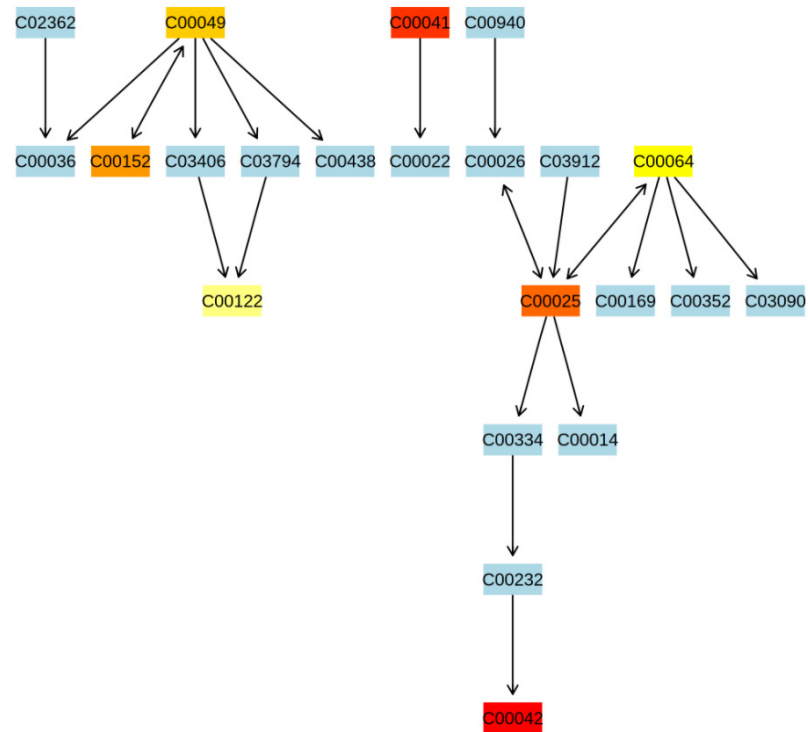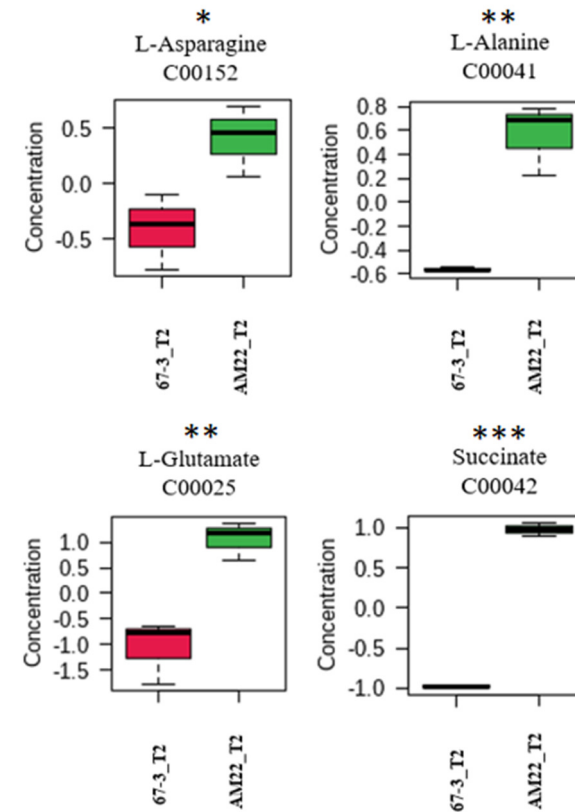

---

**H. Shoot\_T2\_305E40\_vs\_AM22; Glycine, serine and threonine metabolism FDR = 0.0055903 Impact = 0.53598**

---

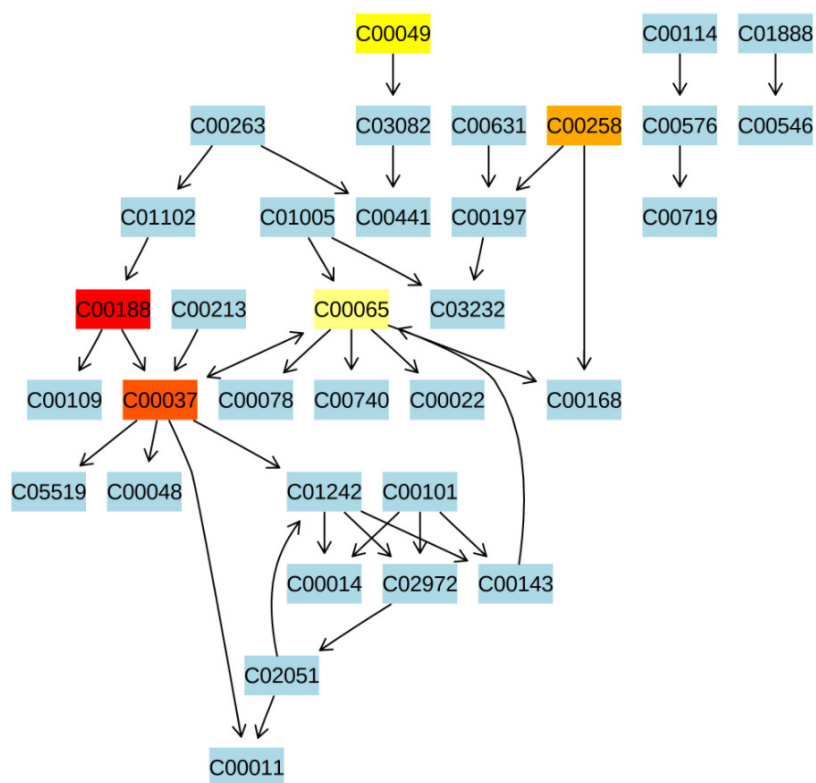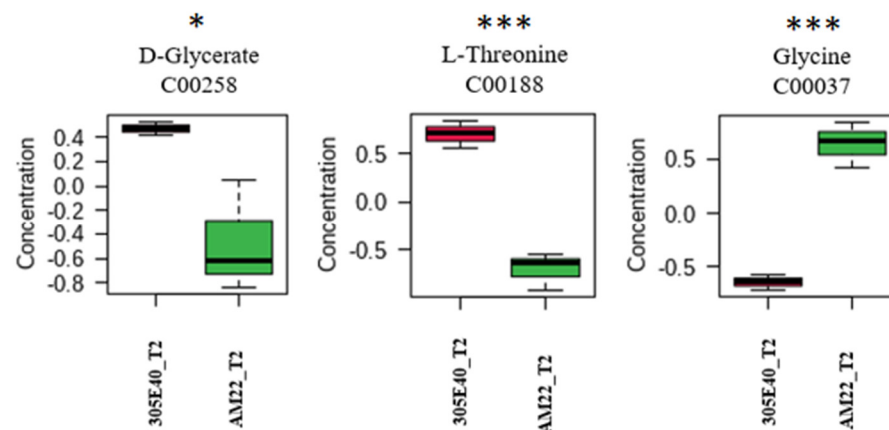





### C. Pathway enrichment analysis and pathway impact

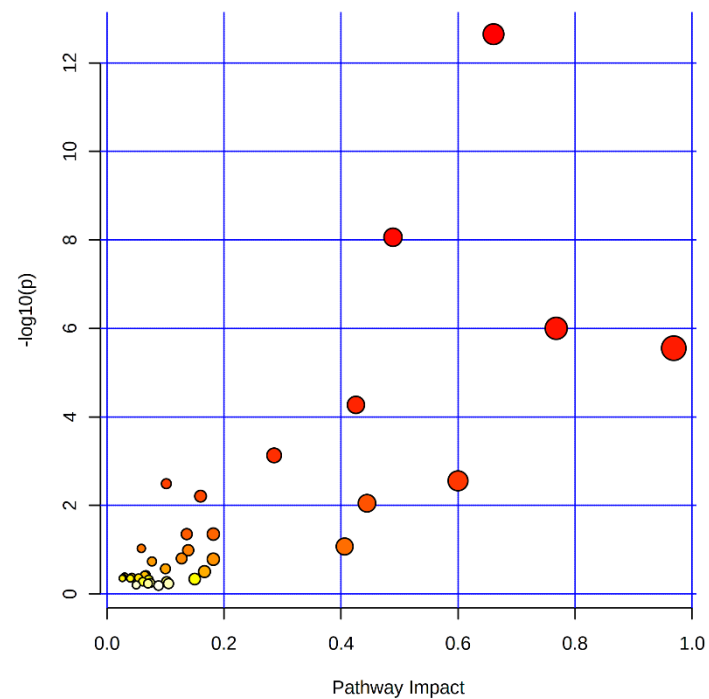

|                                             | Total | Expected | Hits | Raw p    | $-\log(p)$ | Holm adjust | FDR      | Impact  |
|---------------------------------------------|-------|----------|------|----------|------------|-------------|----------|---------|
| Glyoxylate and dicarboxylate metabolism     | 57    | 0.84534  | 13   | 2.24E-13 | 12.649     | 2.15E-11    | 2.15E-11 | 0.66071 |
| Alanine, aspartate and glutamate metabolism | 46    | 0.6822   | 9    | 8.70E-09 | 8.0605     | 8.27E-07    | 4.18E-07 | 0.48889 |
| Starch and sucrose metabolism               | 57    | 0.84534  | 8    | 9.95E-07 | 6.0024     | 9.35E-05    | 3.18E-05 | 0.76786 |
| Glycine, serine and threonine metabolism    | 65    | 0.96398  | 8    | 2.80E-06 | 5.5535     | 0.00026     | 6.71E-05 | 0.96875 |
| Cyanoamino acid metabolism                  | 48    | 0.71186  | 6    | 5.34E-05 | 4.2723     | 0.0049145   | 0.001026 | 0.42553 |
| Butanoate metabolism                        | 29    | 0.43008  | 4    | 0.000741 | 3.1304     | 0.067397    | 0.01185  | 0.28571 |
| Citrate cycle (TCA cycle)                   | 41    | 0.60805  | 4    | 0.002783 | 2.5556     | 0.25043     | 0.038161 | 0.6     |
| Aminoacyl-tRNA biosynthesis                 | 70    | 1.0381   | 5    | 0.00323  | 2.4909     | 0.28743     | 0.038754 | 0.10145 |

**Figure S3.** Heatmap of correlations in eggplant accession between metabolites and transcripts by the Pearson's correlation coefficient ( $p < 0.05$ ) at T0. Correlations between eggplant metabolites and transcripts are based on 70 variables in shoot (A) and root (B).

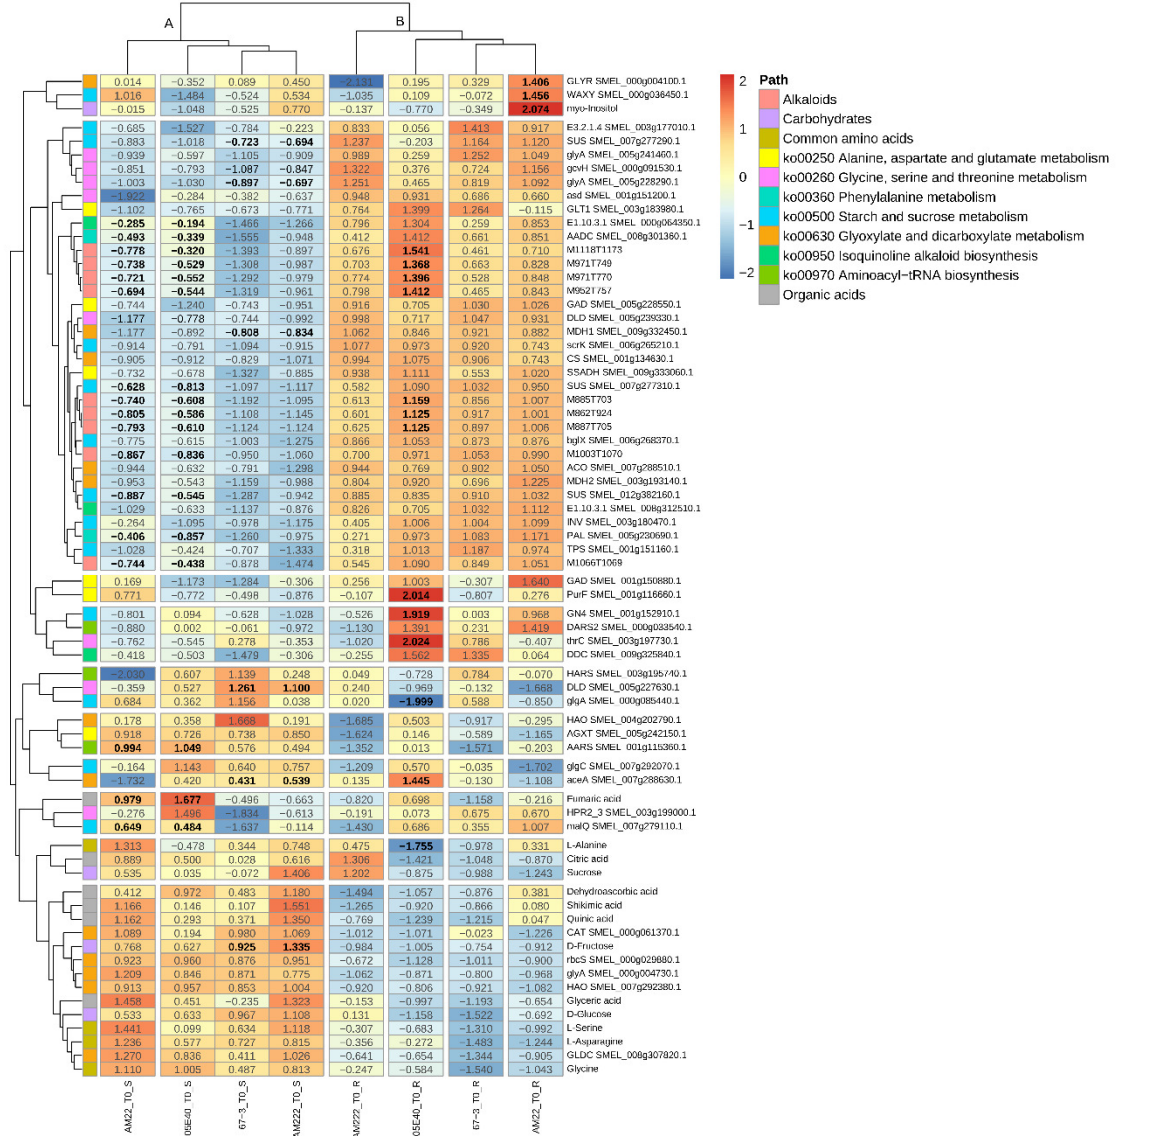

**Figure S4.** Heatmap of correlations in eggplant accession between metabolites and transcripts by the Pearson's correlation coefficient ( $p < 0.05$ ) at T1. Correlations between eggplant metabolites and transcripts are based on 70 variables in shoot (A) and root (B).

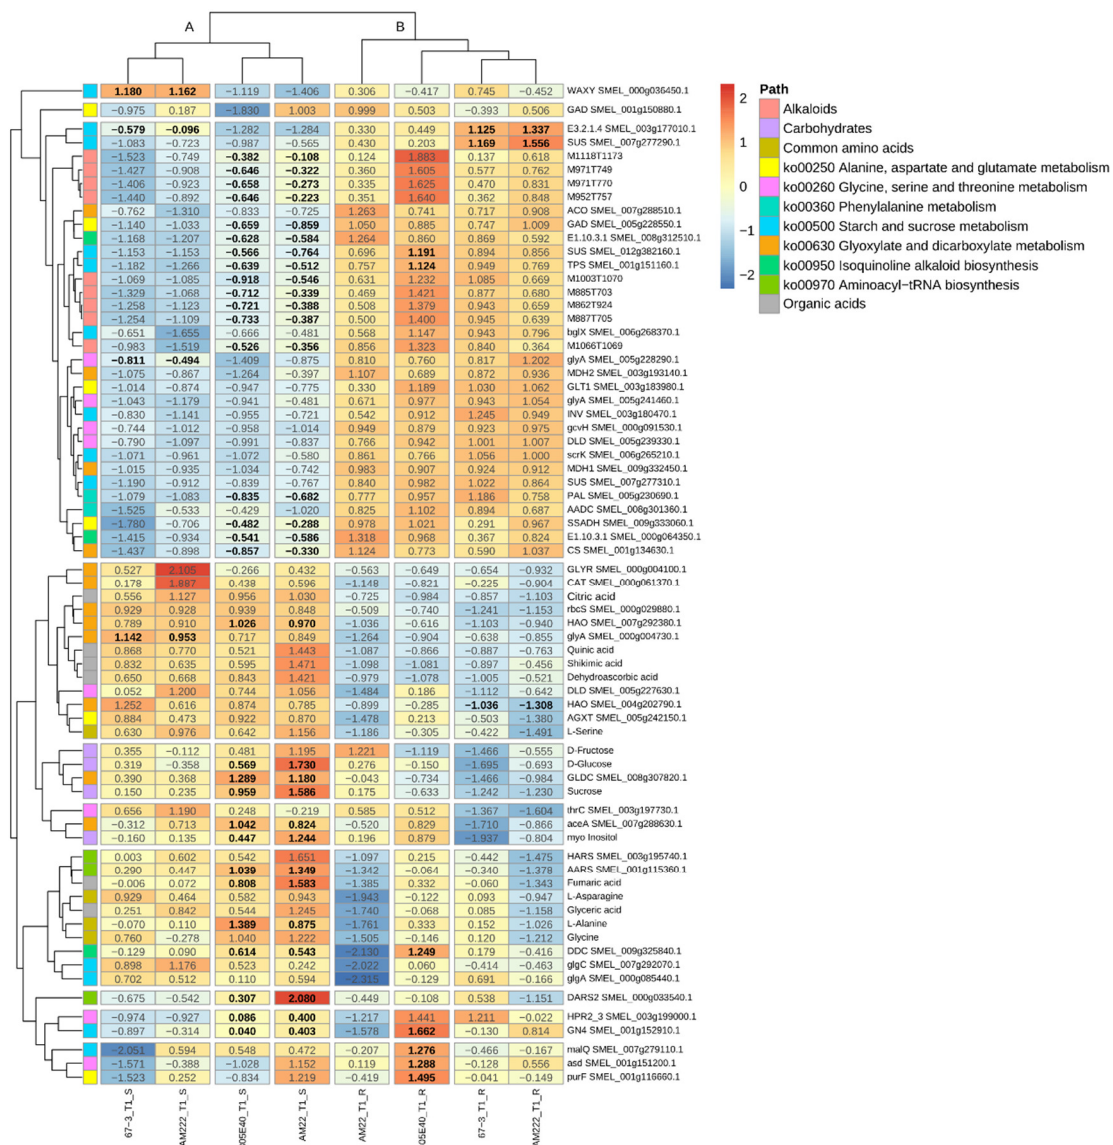



**Figure S5.** Heatmap of correlations in eggplant accession between metabolites and transcripts by the Pearson's correlation coefficient ( $p < 0.05$ ) at T2. Correlations between eggplant metabolites and transcripts are based on 70 variables in shoot (A) and root (B).

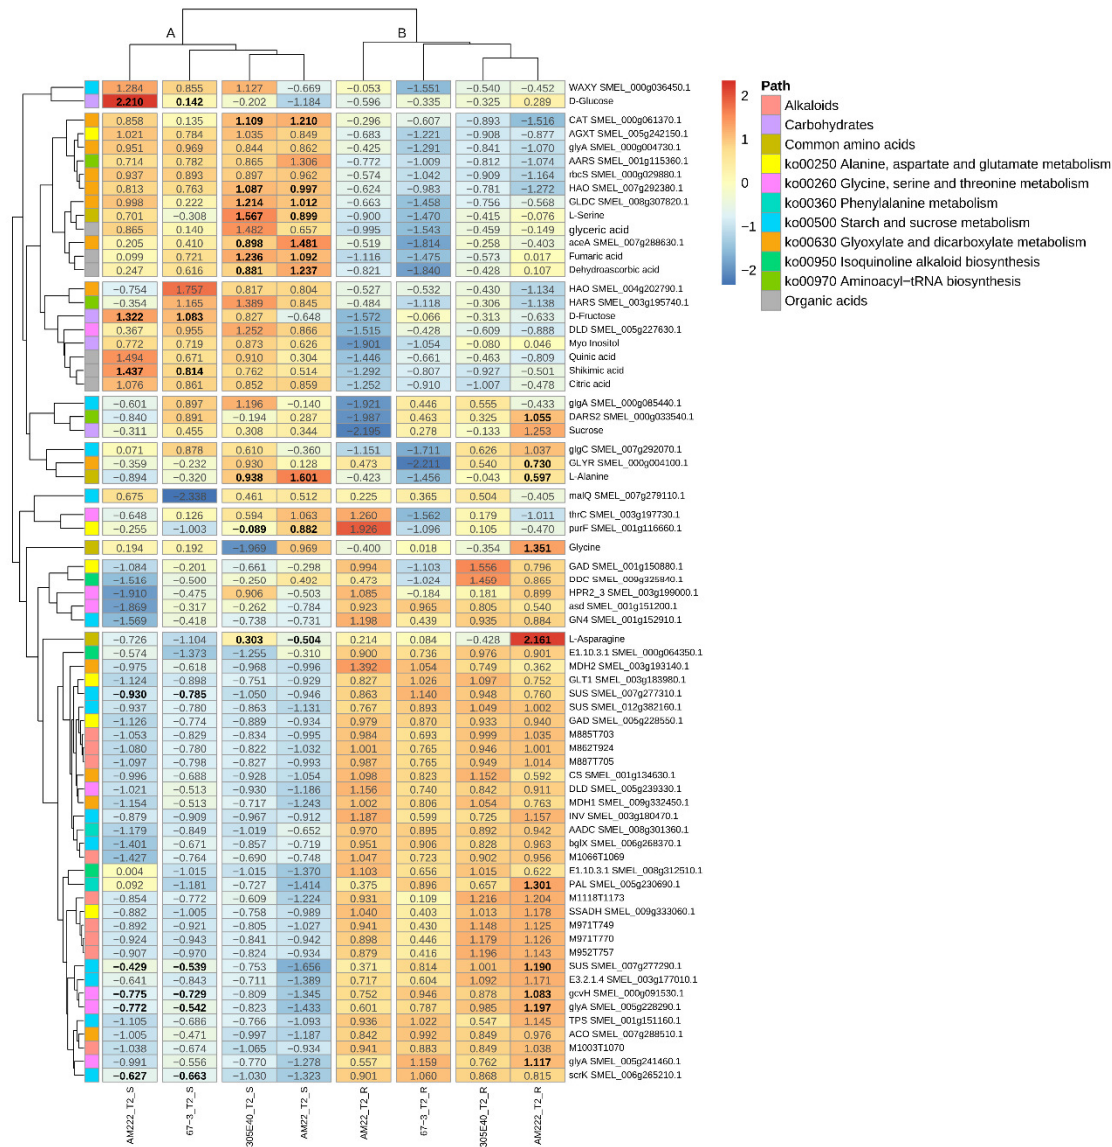

**Figure S6.** Exemplary scheme of Glycine, serine and threonine metabolism between efficient vs inefficient genotypes in shoots: A. T0, B. T1 and C. T2. In gray the metabolites and metabolic genes identified and not statistically different, in green the up-regulated and in yellow the down-regulated.

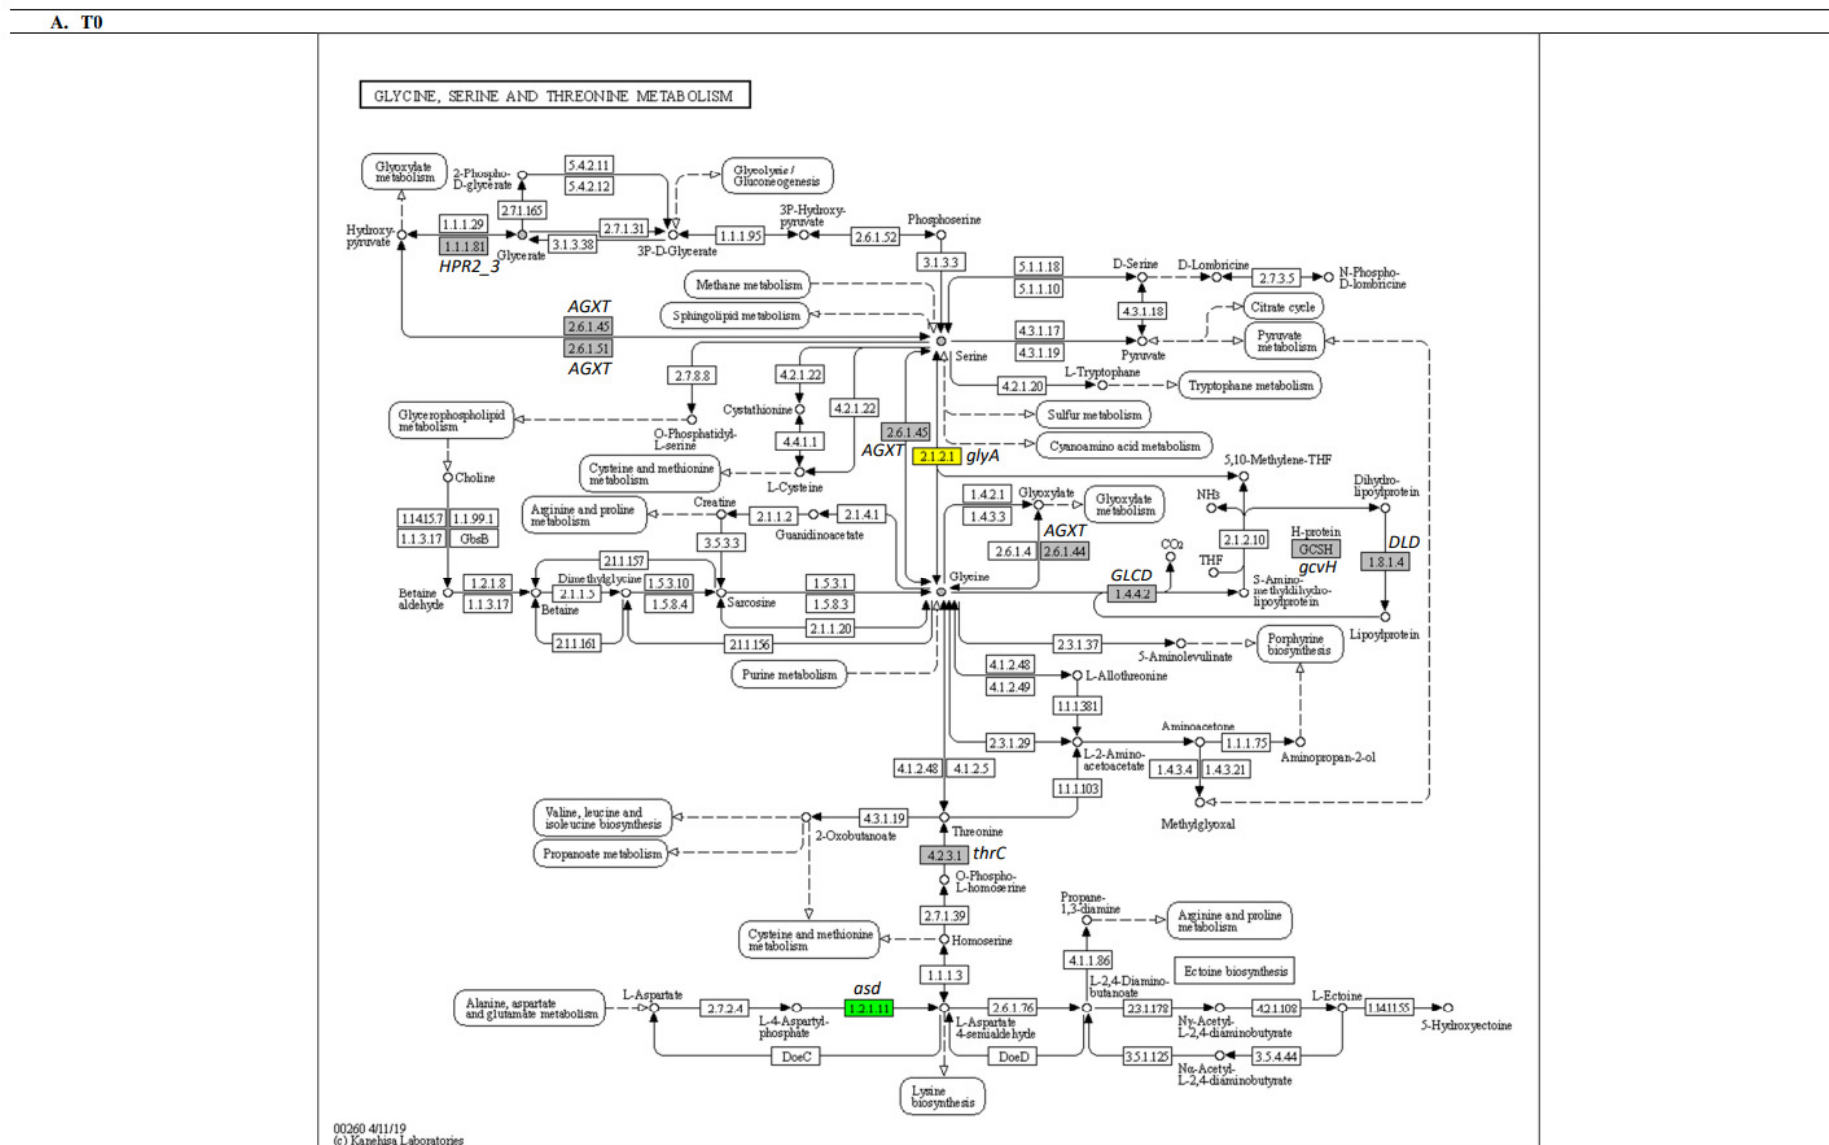

## GLYCINE, SERINE AND THREONINE METABOLISM

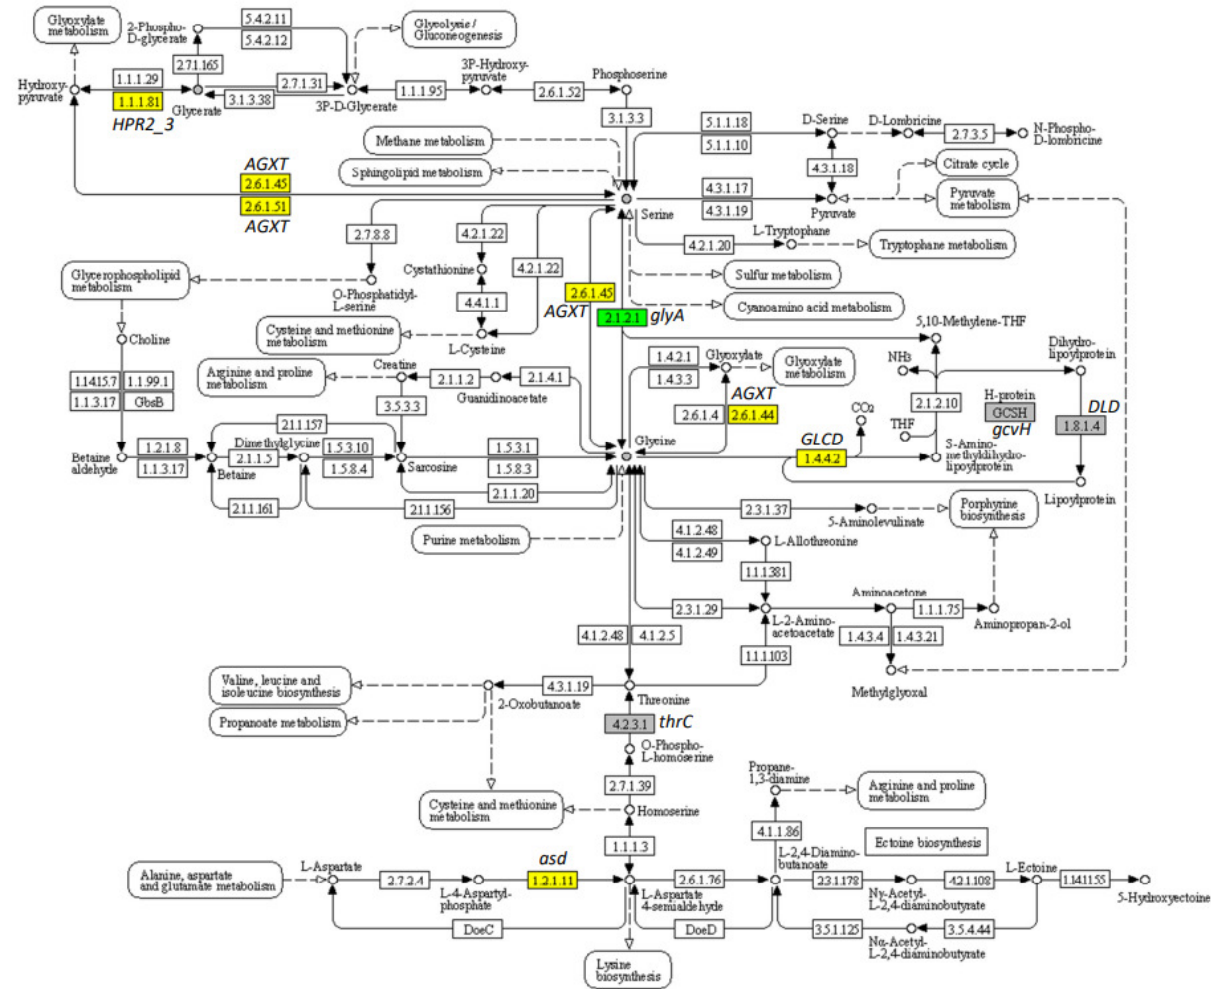

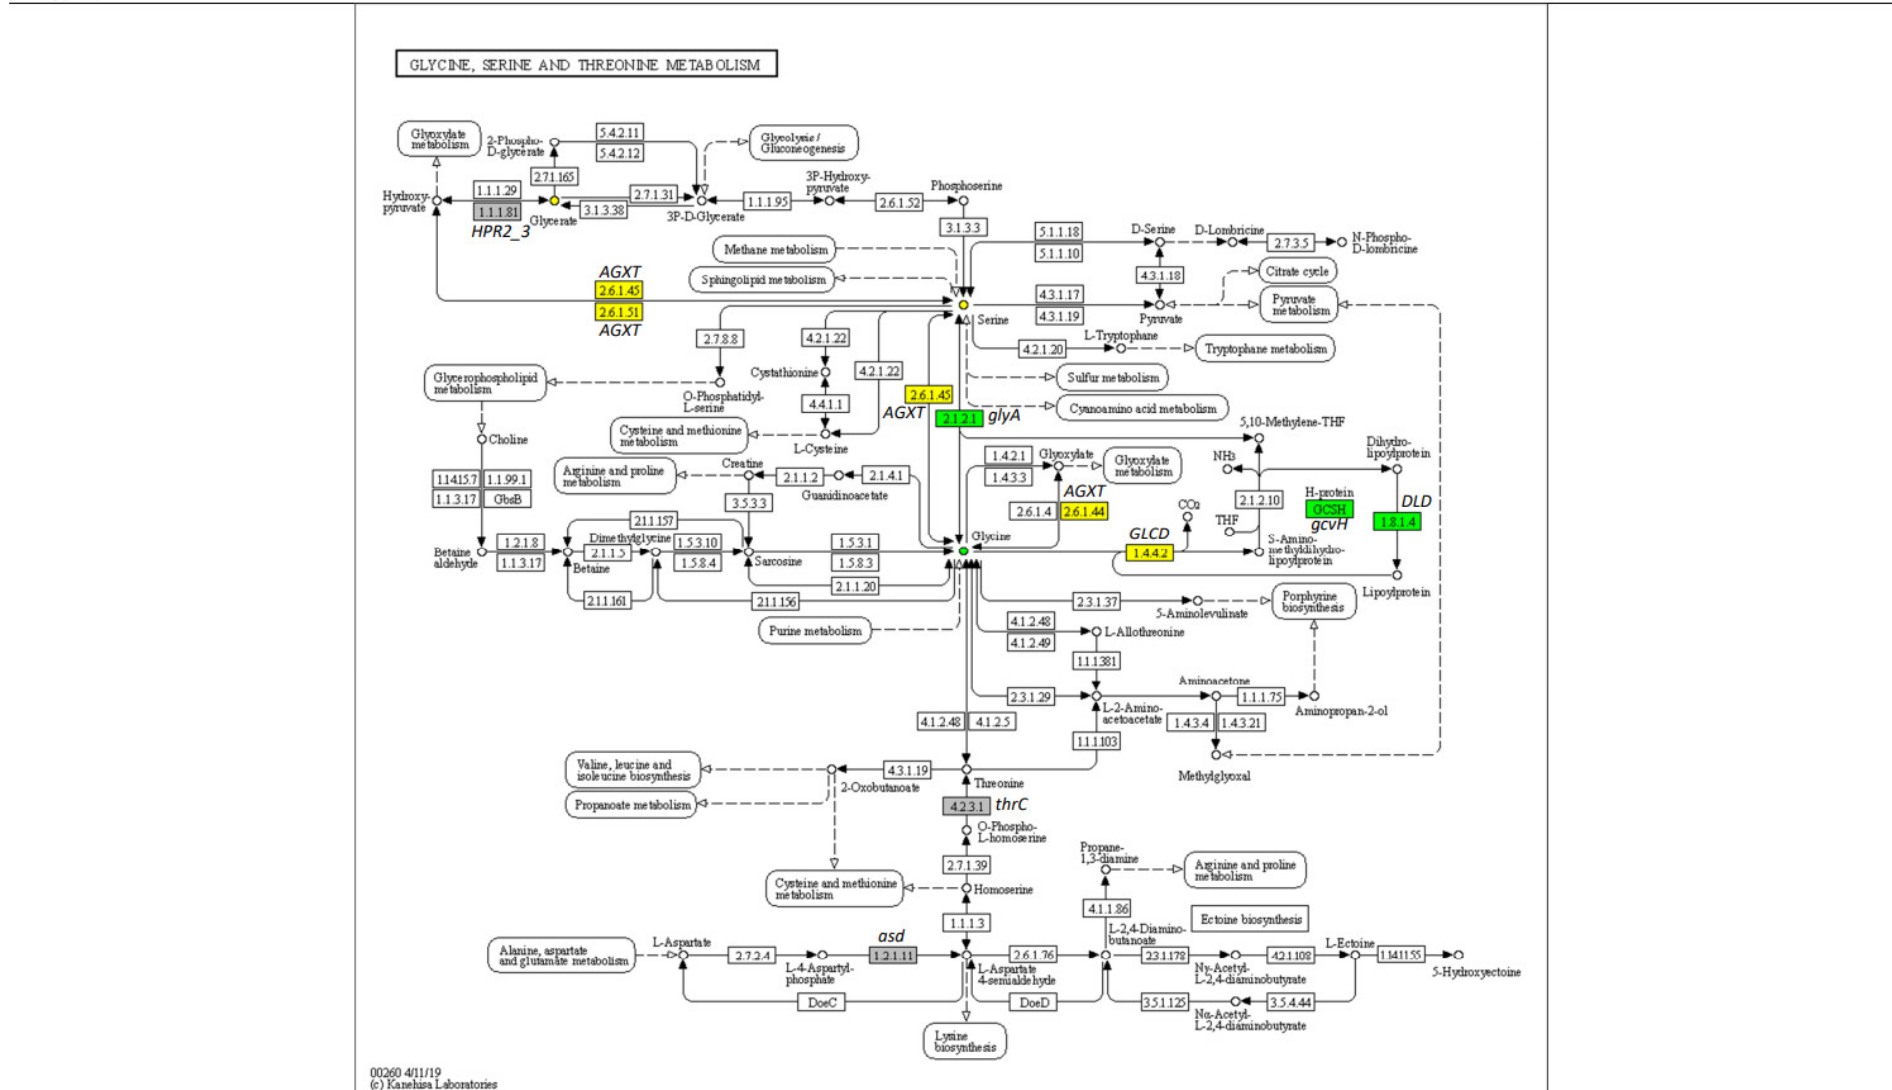



**Figure S7.** Exemplary scheme of Glyoxylate and dicarboxylate metabolism between efficient vs inefficient genotypes in shoots: A. T0, B. T1, C. T2. In gray the metabolites and metabolic genes identified and not statistically different, in green the up-regulated and in yellow the down-regulated. In red the pathway modules relating to the Glyoxylate cycle and Photorespiration.

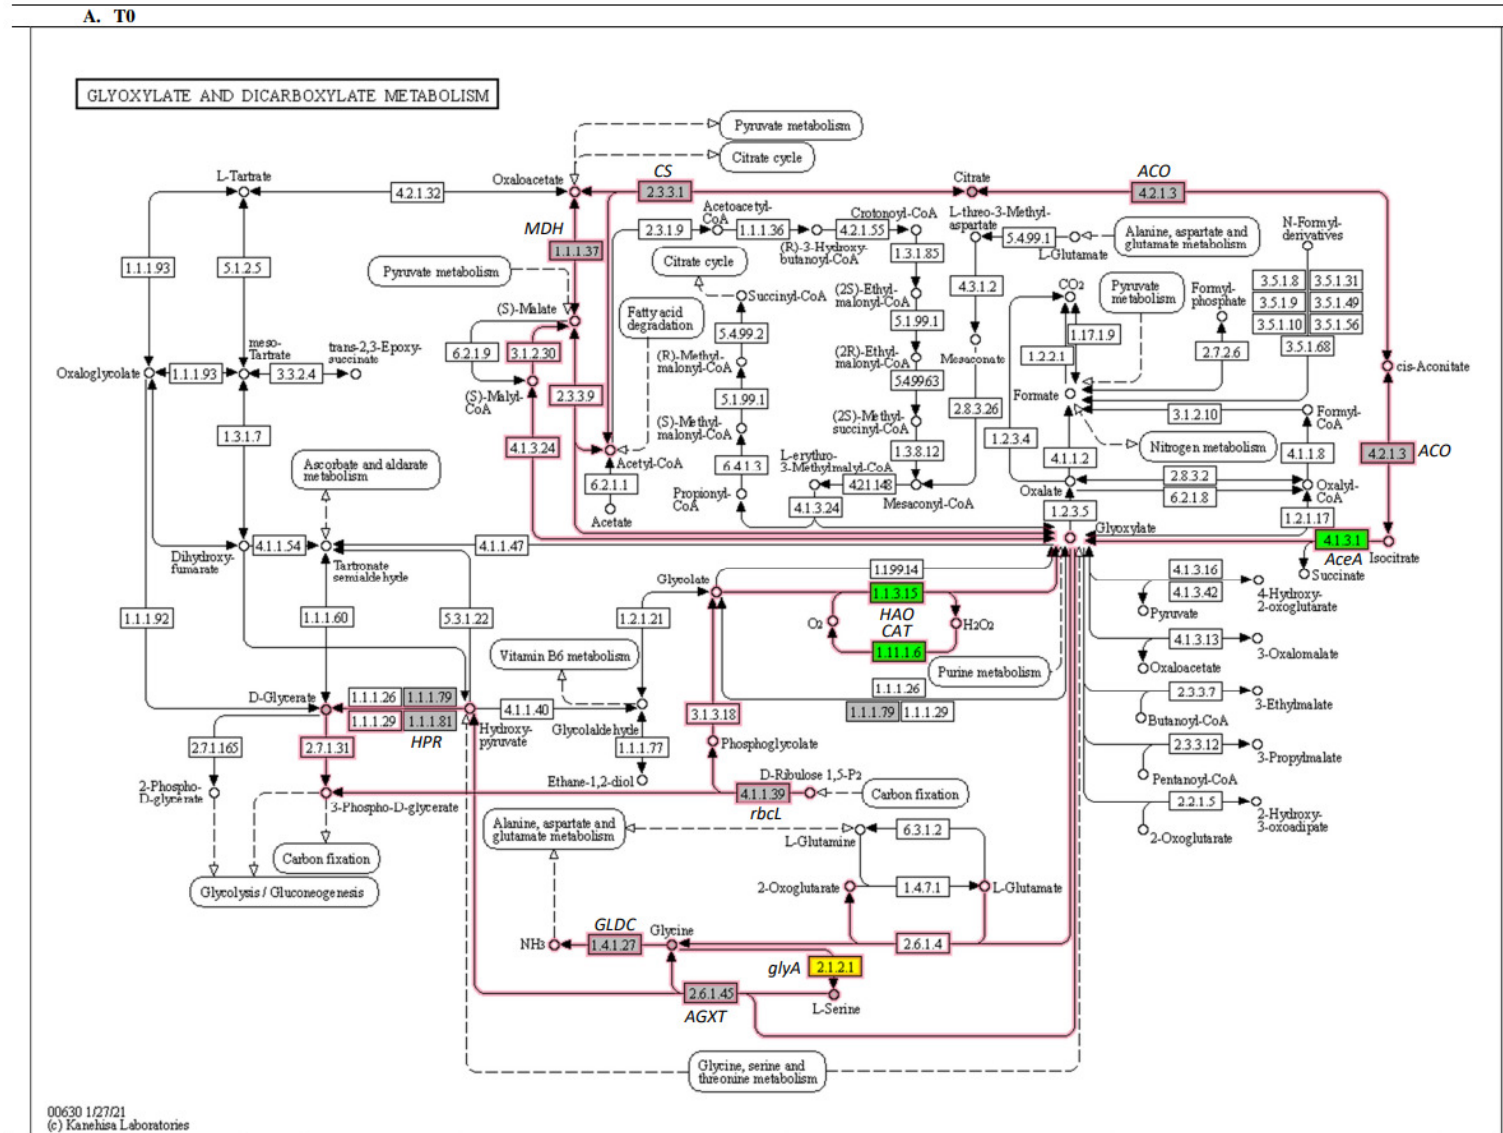

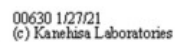

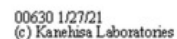

**Figure S8.** Exemplary scheme of Starch and sucrose metabolism between efficient vs inefficient genotypes in shoots: A. T0, B. T1, C. T2. In gray the metabolites and metabolic genes identified and not statistically different, in green the up-regulated and in yellow the down-regulated. In red the pathway modules relating to the Glycogen biosynthesis and Trehalose biosynthesis.

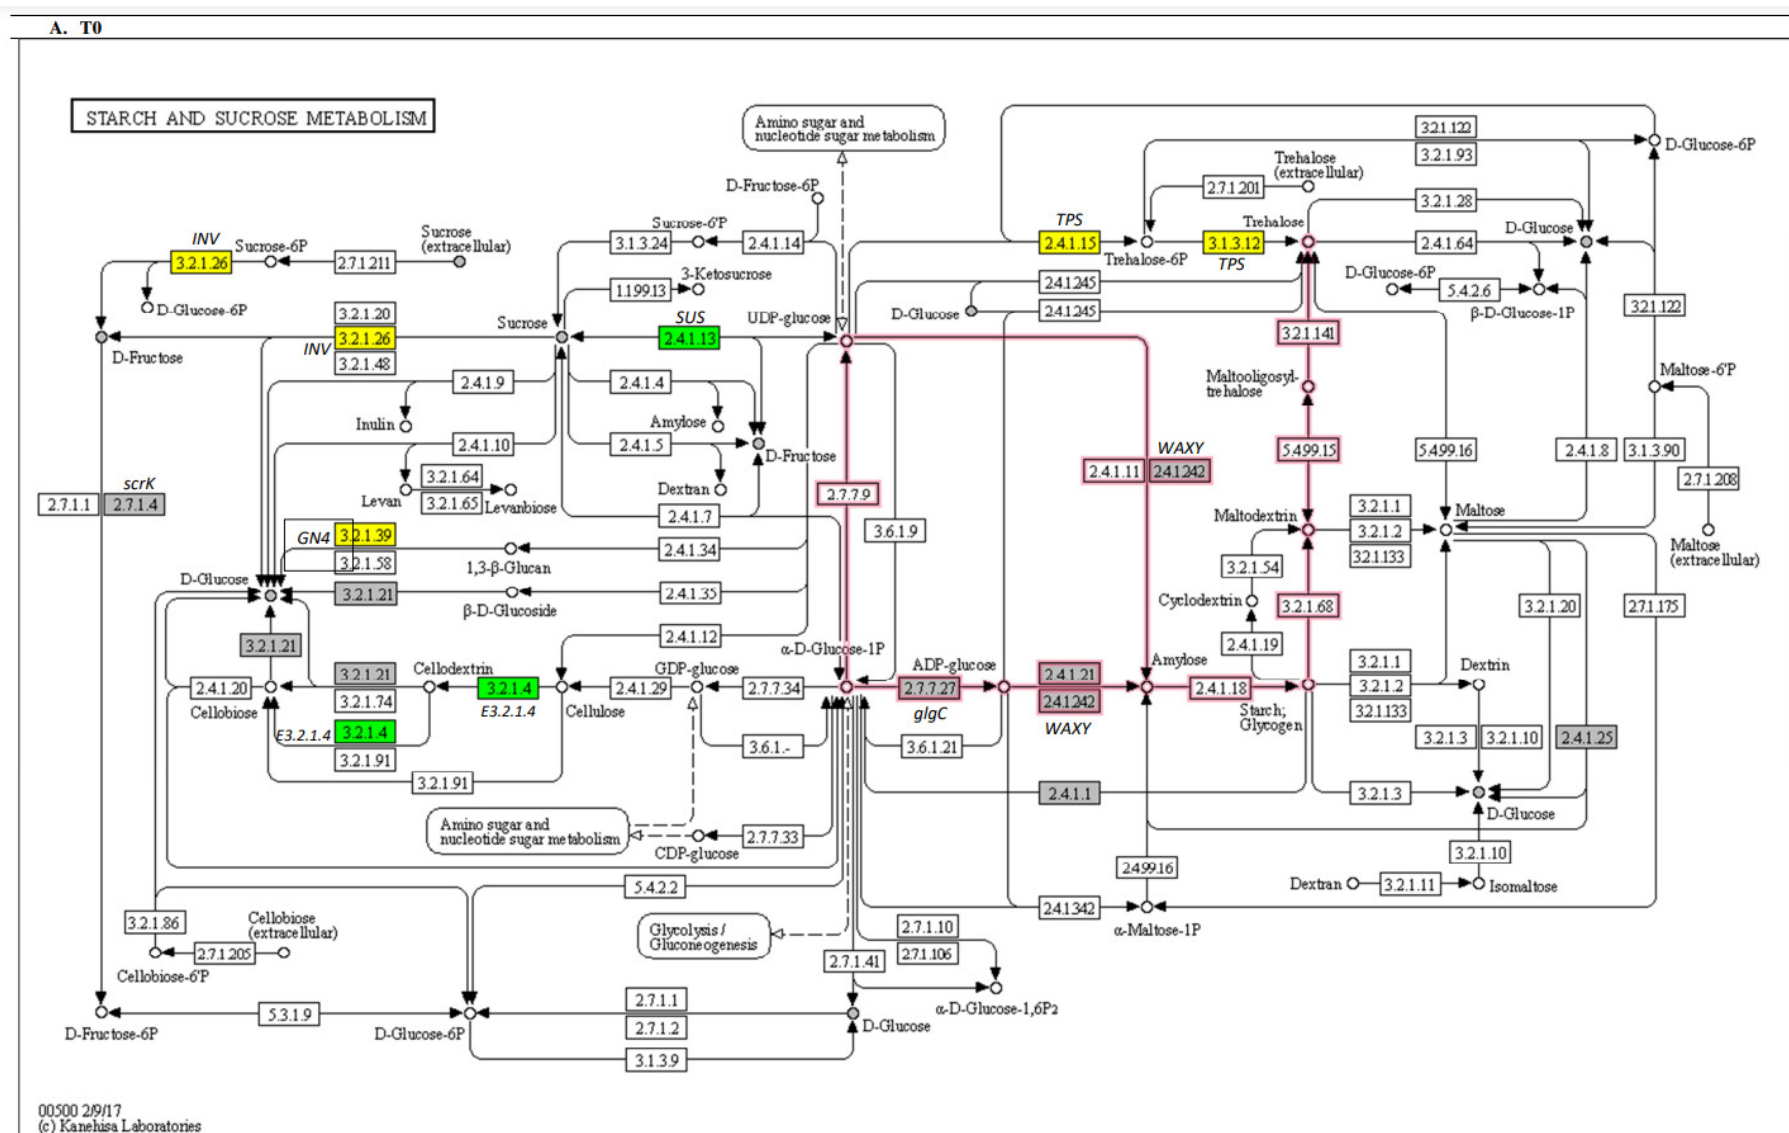



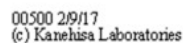

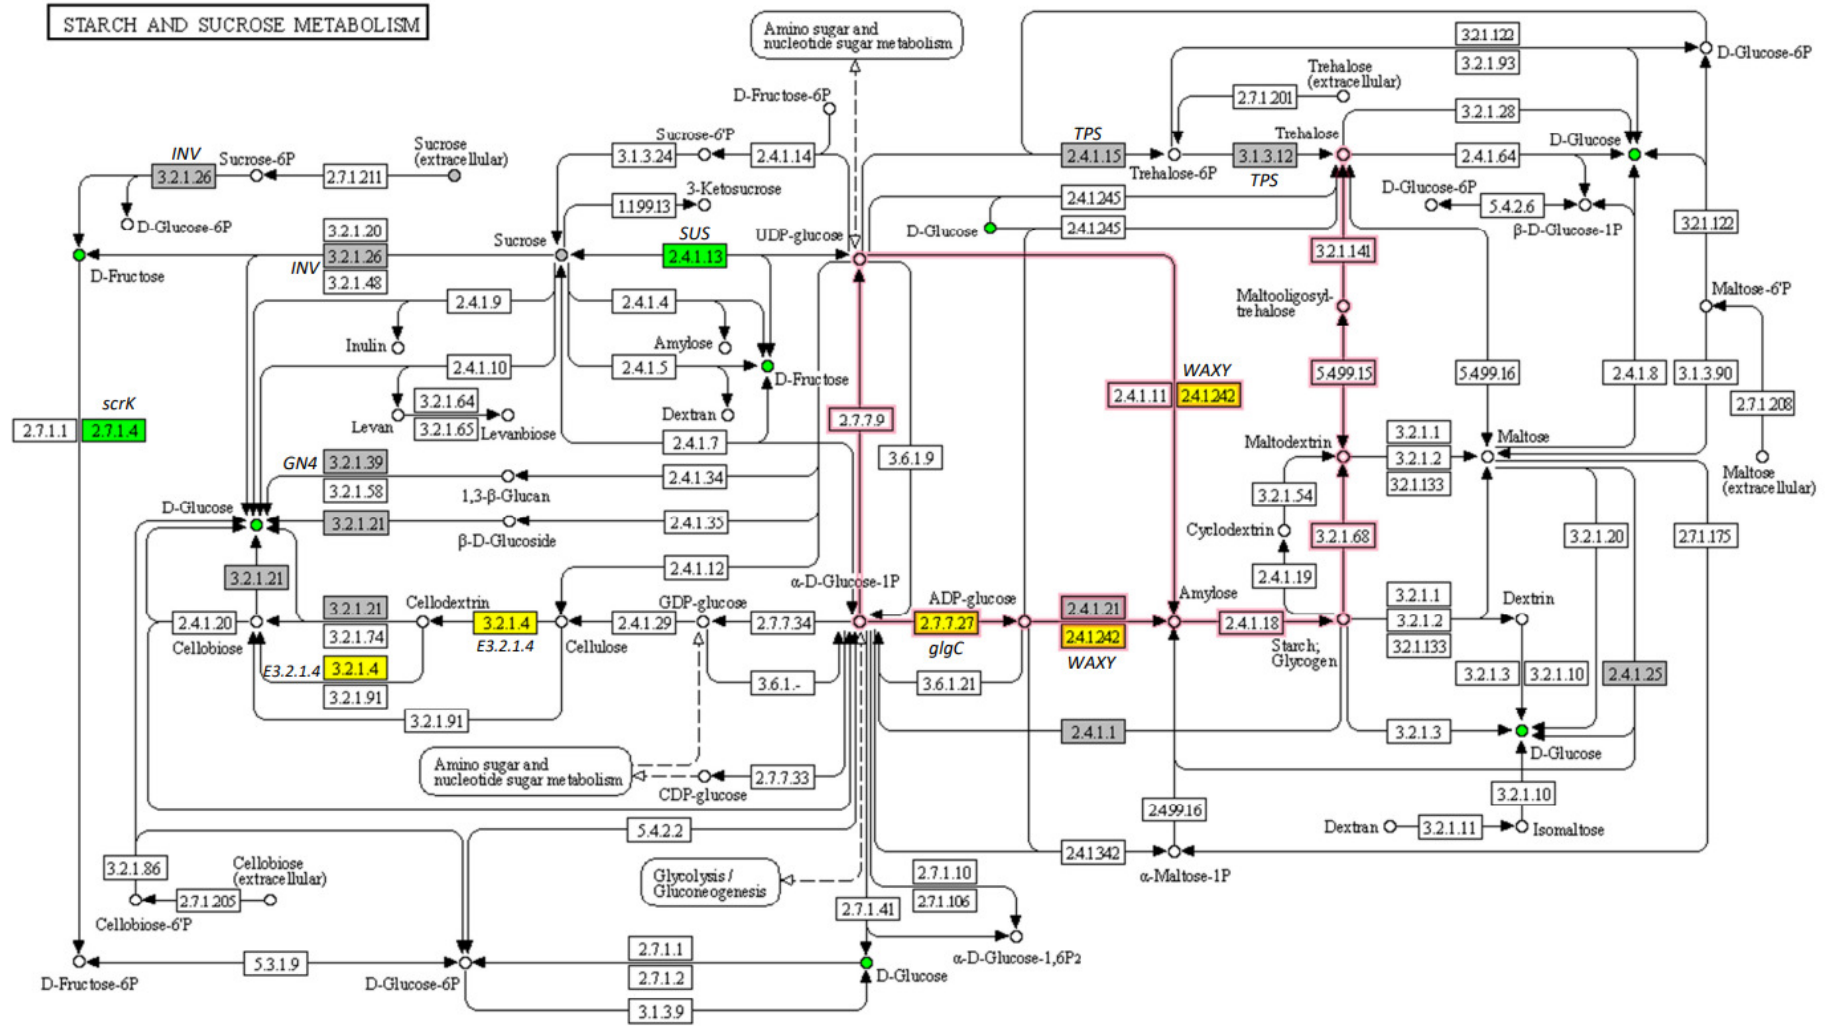

Supplement: s1 [file s1]
