# Supplementary material for: Uncovering Pathways Highly Correlated to NUE through a Combined Metabolomics and Transcriptomics Approach in Eggplant
Source: Plants (Basel). 2022 Mar 4;11(5):700. doi: 10.3390/plants11050700 (PMC8912549; doi:10.3390/plants11050700)
Supplement: Supplementary file 1 [file plants-11-00700-s001.zip › plants-1602087 R3 supplementary.xlsx]

## Sheet: Table S1
Table S1. A. Putatively metabolites identiﬁed from eggplant roots and shoots by GC –MS.
	B. Putatively metabolites identified from eggplant roots and shoots by UPLC-QTOF-MS analysis.
A.	Amino acid	Organic acid	Sugar				B.	ID PeakName	Putative annotated metabolites	references
	Acetic acid*	Citric acid	D-Fructose					M1118T1173	Unsaturated malonyl furostanol type Saponin	Sonawane et al., (2018)
	Glycine	Dehydroascorbic acid	D-Glucose					M1066T1069	Unknown steroidal saponin
	L-Alanine	Fumaric acid	L-Arabinose					M869T830	Solamargine isomer
	L-Asparagine	Glyceric acid	myo-Inositol					M862T924	Unsaturated UGA	Lelario et al., (2019)
	L-Aspartic acid	L-Malic acid	Sucrose					M885T703	Hydroxy-solamargine isomer 1
	L-Cysteine	Oxalic acid						M887T705	Hydroxy dihydro solamargine
	L-Glutamic acid	Pyroglutamic acid						M971T749	Hydroxy malonyl solamargine
	L-Glutamine**	Quinic acid						M971T770	Hydroxy malonyl solamargine isomer
	L-Isoleucine	Shikimic acid						M1003T1070	UGA
	L-Leucine	Succinic acid						M952T757	Unsaturated malonyl solamargine
	L-Phenylalanine	Stearic acid*						M866T819	Unsaturated UGA
	L-Proline							M1120T1174*	Saturated malonyl furostanol type Saponin	Sonawane et al., (2018)
	L-Serine							M1034T1131*	Saturated furostanol type saponin	Sonawane et al., (2018)
	L-Threonine							M1032T1123*	Furostanol type saponin	Sonawane et al., (2018)
	L-Tryptophan*							M1001T1036*	Arudonine	Lelario et al., (2019)
	L-Tyrosine*							M955T1107*	Malonyl-solamargine	Sonawane et al., (2018)
	L-Valine							M885T1016*	Solasonine (S)
								M885T678*	Hydroxy-solamargine
	* Detected in root; **Detected in shoot							M885T1060*	Solasonine isomer
								M885T1031*	Solasonine isomer
								M871T1092*	Soladulcine A	Sonawane et al., 2018
								M869T1056*	Solamargine (S)
								M205T220*	Tryptophan (S)
								M166T126*	Phenylalanine (S)
								M903T687*	Hydroxy dihydro solasonine
								M885T877*	Hydroxylated UGA
								M885T649*	Hydroxylated UGA
								M1017T860*	UGA with 4 sugars
								M1048T1106*	Furostanol-type saponine
								* Detected in root; UGA=unknown glycoalkaloid; (S) = commercial standard

## Sheet: Table S2
Table S2. A) Loading plot root and B) Loading plot shoot. Marked in yellow variable with cutoff +/- 0.14.
A.	PC1		PC2			B.	PC1		PC2
Fumaric acid	0.2781	L-Asparagine	0.42232			L-Proline	0.45793	L-Malic acid	0.36511
Acetic acid	0.27791	L-Isoleucine	0.39766			L-Phenylalanine	0.33395	L-Phenylalanine	0.25894
Glycine	0.27198	L-Aspartic acid	0.29891			L-Glutamic acid	0.28547	Glyceric acid	0.24655
L-Valine	0.25454	L-Tyrosine	0.24998			L-Isoleucine	0.28162	M869T830	0.22681
L-Proline	0.25359	Glycine	0.14241			Succinic acid	0.27341	L-Isoleucine	0.22294
L-Threonine	0.24464	L-Tryptophan	0.1277			L-Cysteine	0.18934	Shikimic acid	0.20843
Glyceric acid	0.24329	D-Glucose	0.12289			L-Asparagine	0.1773	M885T703	0.19274
L-Phenylalanine	0.24082	Citric acid	0.12048			D-Glucose	0.14877	Fumaric acid	0.16771
Oxalic acid	0.2387	Sucrose	0.10815			Glycine	0.13209	L-Glutamic acid	0.16754
L-Tyrosine	0.2314	L-Arabinose	0.085203			Oxalic acid	0.12206	M862T924	0.16663
Succinic acid	0.22616	Oxalic acid	0.0835			L-Arabinose	0.1078	L-Threonine	0.16487
L-Cysteine	0.21229	M1017T860	0.074358			L-Serine	0.096396	M887T705	0.16033
L-Aspartic acid	0.20521	M1118T1173	0.065865			L-Aspartic acid	0.090249	myo-Inositol	0.15295
L-Glutamic acid	0.19477	M866T819	0.065654			M869T830	0.086129	L-Leucine	0.1422
L-Isoleucine	0.19157	M885T877	0.062891			L-Glutamine	0.077027	L-Serine	0.14089
L-Asparagine	0.18239	M205T220	0.055177			L-Valine	0.066594	L-Cysteine	0.11833
L-Malic acid	0.14312	M971T749	0.055014			Sucrose	0.065376	L-Arabinose	0.11744
L-Tryptophan	0.12957	M1001T1036	0.053372			M1066T1069	0.062791	Succinic acid	0.1066
L-Leucine	0.1096	M166T126	0.052875			myo-Inositol	0.06104	L-Alanine	0.084448
L-Alanine	0.10843	M887T705	0.050217			M866T819	0.049568	L-Valine	0.082296
L-Serine	0.10287	M862T924	0.048552			D-Fructose	0.038183	Citric acid	0.07874
L-Arabinose	0.068792	M885T1016	0.037718			L-Alanine	0.025158	L-Proline	0.071991
Citric acid	0.051956	M1034T1131	0.036499			Dehydroascorbic acid	0.018946	Pyroglutamic acid	0.065134
Stearic acid	0.051047	L-Cysteine	0.021144			M1118T1173	0.017181	Quinic acid	0.059321
M1003T1070	0.050287	M1048T1106	0.014256			Glyceric acid	0.009287	Dehydroascorbic acid	0.054536
Pyroglutamic acid	0.04942	Pyroglutamic acid	0.008418			L-Threonine	-0.00236	M866T819	0.032069
Sucrose	0.046457	D-Fructose	0.000422			M971T770	-0.01817	L-Aspartic acid	0.02234
Dehydroascorbic acid	0.043974	M869T1056	-0.00734			M1003T1070	-0.02023	M952T757	0.013369
Quinic acid	0.042108	M1120T1174	-0.00832			M952T757	-0.02127	Sucrose	0.010074
Shikimic acid	0.040476	L-Valine	-0.00951			Citric acid	-0.03964	M971T770	-0.00829
M166T126	0.039716	M885T703	-0.00963			Shikimic acid	-0.04008	M971T749	-0.01509
M866T819	0.036082	M885T649	-0.01208			Quinic acid	-0.04765	M1118T1173	-0.02399
D-Glucose	0.029688	M1003T1070	-0.01568			Fumaric acid	-0.07548	M1066T1069	-0.02594
M1001T1036	0.024595	M1066T1069	-0.01677			L-Malic acid	-0.08305	M1003T1070	-0.0677
myo-Inositol	0.020758	Acetic acid	-0.01709			M971T749	-0.10102	D-Glucose	-0.07659
M1032T1123	0.017989	M871T1092	-0.02083			Pyroglutamic acid	-0.13304	L-Asparagine	-0.10081
M1118T1173	0.017116	myo-Inositol	-0.02537			M887T705	-0.17633	D-Fructose	-0.13104
M903T687	0.011075	L-Leucine	-0.02564			M885T703	-0.18891	L-Glutamine	-0.13957
M885T649	0.008126	M952T757	-0.0279			M862T924	-0.21194	Glycine	-0.15418
M885T877	0.004201	M885T1031	-0.02997			L-Leucine	-0.25072	Oxalic acid	-0.40012
M1120T1174	0.004065	M1032T1123	-0.03081
M862T924	0.001689	M885T678	-0.0328
M869T830	-0.00385	M955T1107	-0.03457
M885T1031	-0.00508	M869T830	-0.03537
M1066T1069	-0.00669	M903T687	-0.03939
M971T749	-0.00677	L-Glutamic acid	-0.04267
M971T770	-0.00727	Quinic acid	-0.04335
M952T757	-0.00787	L-Proline	-0.04656
M885T1060	-0.00932	Stearic acid	-0.05023
M869T1056	-0.01035	M885T1060	-0.05238
M885T703	-0.01115	Shikimic acid	-0.05452
M205T220	-0.01432	M971T770	-0.06505
M1034T1131	-0.01692	L-Serine	-0.07571
M1017T860	-0.018	Dehydroascorbic acid	-0.10416
M885T1016	-0.02215	L-Phenylalanine	-0.12165
M887T705	-0.02351	L-Alanine	-0.12877
M885T678	-0.0264	L-Malic acid	-0.15911
M1048T1106	-0.02984	Succinic acid	-0.22125
M955T1107	-0.03661	Glyceric acid	-0.24335
D-Fructose	-0.03923	L-Threonine	-0.28346
M871T1092	-0.04362	Fumaric acid	-0.30083

## Sheet: Table S3
Table S3. Partial Least Squares Discriminant Analysis (PLS-DA) based on variable importance in projection (VIP) measure for each single metabolites.
They are taken into consideration starting from a VIP score of 1 in shoot.
Shoot	Comp. 1
Succinic acid	2.55
Oxalic acid	2.5196
M869T830	1.988
L-Glutamic acid	1.8922
Shikimic acid	1.7641
L-Phenylalanine	1.7533
myo-Inositol	1.4577
L-Cysteine	1.2709
L-Isoleucine	1.1124
L-Glutamine	1.0922
L-Leucine	0.95863
M1003T1070	0.95405
L-Serine	0.86808
Pyroglutamic acid	0.8434
Glyceric acid	0.76555
L-Aspartic acid	0.75704
D-Fructose	0.66977
M1066T1069	0.63681
L-Threonine	0.63666
L-Arabinose	0.61134
L-Malic acid	0.57113
L-Proline	0.52831
L-Alanine	0.52644
Quinic acid	0.52125
Glycine	0.51245
M866T819	0.3943
L-Valine	0.38015
M971T770	0.31226
M887T705	0.30961
Fumaric acid	0.22361
M952T757	0.21654
M971T749	0.19466
L-Asparagine	0.18229
M1118T1173	0.16386
Citric acid	0.16069
D-Glucose	0.1466
Sucrose	0.10077
M862T924	0.074771
Dehydroascorbic acid	0.072652
M885T703	0.016144
M885T703.1	0.016144

## Sheet: Table S4
Table S4. A)Root and B)shoot metabolites. One-way ANOVA & post-hoc Tests Adjusted p-value (FDR) cutoff: 0.05 Post-hoc analysis: Fisher’s LSD.
Differences between genotypes at the same time marked in yellow. Marked in green the differences for the same genotype at different times.
No marked differences between genotypes at different times.
A. Root	f.value	p.value	log10(p)	FDR	Fisher's LSD
M1066T1069	1.0331	1.2268e-06	5.91123	7.4835e-05	305E40_T0_R - 67-3_T1_R	305E40_T0_R - 67-3_T2_R	305E40_T0_R - AM222_T0_R	305E40_T0_R - AM222_T1_R	305E40_T1_R - 67-3_T1_R	305E40_T1_R - 67-3_T2_R	AM22_T1_R - 305E40_T1_R	305E40_T1_R - AM222_T1_R	AM22_T1_R - 305E40_T2_R	AM22_T2_R - 305E40_T2_R	305E40_T2_R - AM222_T1_R	67-3_T0_R - 67-3_T2_R	AM22_T1_R - 67-3_T0_R	67-3_T0_R - AM222_T1_R	AM22_T0_R - 67-3_T1_R	AM22_T1_R - 67-3_T1_R	AM22_T2_R - 67-3_T1_R	67-3_T1_R - AM222_T1_R	AM22_T0_R - 67-3_T2_R	AM22_T1_R - 67-3_T2_R	AM22_T2_R - 67-3_T2_R	67-3_T2_R - AM222_T1_R	AM22_T0_R - AM222_T0_R	AM22_T0_R - AM222_T1_R	AM22_T1_R - AM222_T0_R	AM22_T1_R - AM222_T1_R	AM22_T1_R - AM222_T2_R	AM22_T2_R - AM222_T0_R	AM22_T2_R - AM222_T1_R	AM22_T2_R - AM222_T2_R	AM222_T0_R - AM222_T1_R	AM222_T2_R - AM222_T1_R
M871T1092	6.2433	9.1319e-05	4.03944	0.0025128	67-3_T1_R - 305E40_T0_R	67-3_T2_R - 305E40_T0_R	AM22_T0_R - 305E40_T0_R	AM22_T1_R - 305E40_T0_R	AM22_T2_R - 305E40_T0_R	AM222_T1_R - 305E40_T0_R	67-3_T0_R - 305E40_T1_R	67-3_T1_R - 305E40_T1_R	67-3_T2_R - 305E40_T1_R	AM22_T0_R - 305E40_T1_R	AM22_T1_R - 305E40_T1_R	AM22_T2_R - 305E40_T1_R	AM222_T0_R - 305E40_T1_R	AM222_T1_R - 305E40_T1_R	AM222_T2_R - 305E40_T1_R	67-3_T1_R - 305E40_T2_R	67-3_T2_R - 305E40_T2_R	AM22_T0_R - 305E40_T2_R	AM22_T1_R - 305E40_T2_R	AM22_T2_R - 305E40_T2_R	AM222_T1_R - 305E40_T2_R	67-3_T1_R - 67-3_T0_R	67-3_T2_R - 67-3_T0_R	AM22_T0_R - 67-3_T0_R	AM22_T1_R - 67-3_T0_R	AM22_T2_R - 67-3_T0_R	AM222_T1_R - 67-3_T0_R	67-3_T1_R - AM222_T0_R	67-3_T1_R - AM222_T2_R	67-3_T2_R - AM222_T0_R	67-3_T2_R - AM222_T2_R	AM22_T0_R - AM222_T0_R	AM22_T0_R - AM222_T2_R	AM22_T1_R - AM222_T0_R	AM22_T1_R - AM222_T2_R	AM22_T2_R - AM222_T0_R	AM22_T2_R - AM222_T2_R	AM222_T1_R - AM222_T0_R	AM222_T1_R - AM222_T2_R
myo-Inositol	6.0056	0.00012358	3.90805	0.0025128	305E40_T0_R - 67-3_T1_R	305E40_T0_R - 67-3_T2_R	305E40_T0_R - AM22_T2_R	305E40_T1_R - 67-3_T1_R	305E40_T1_R - 67-3_T2_R	305E40_T1_R - AM22_T2_R	AM22_T0_R - 305E40_T2_R	AM22_T1_R - 305E40_T2_R	305E40_T2_R - AM22_T2_R	67-3_T0_R - 67-3_T1_R	67-3_T0_R - 67-3_T2_R	67-3_T0_R - AM22_T2_R	AM22_T0_R - 67-3_T1_R	AM22_T1_R - 67-3_T1_R	AM222_T0_R - 67-3_T1_R	AM222_T1_R - 67-3_T1_R	AM222_T2_R - 67-3_T1_R	AM22_T0_R - 67-3_T2_R	AM22_T1_R - 67-3_T2_R	AM222_T0_R - 67-3_T2_R	AM222_T1_R - 67-3_T2_R	AM222_T2_R - 67-3_T2_R	AM22_T0_R - AM22_T2_R	AM22_T1_R - AM22_T2_R	AM222_T0_R - AM22_T2_R	AM222_T1_R - AM22_T2_R	AM222_T2_R - AM22_T2_R
M885T1031	5.3963	0.0002777	3.55642	0.004235	305E40_T0_R - 67-3_T1_R	AM22_T2_R - 305E40_T0_R	AM222_T1_R - 305E40_T0_R	AM222_T2_R - 305E40_T0_R	305E40_T1_R - 67-3_T1_R	AM22_T2_R - 305E40_T1_R	AM222_T1_R - 305E40_T1_R	AM222_T2_R - 305E40_T1_R	305E40_T2_R - 67-3_T1_R	67-3_T2_R - 305E40_T2_R	AM22_T2_R - 305E40_T2_R	AM222_T1_R - 305E40_T2_R	AM222_T2_R - 305E40_T2_R	67-3_T0_R - 67-3_T1_R	AM22_T2_R - 67-3_T0_R	AM222_T1_R - 67-3_T0_R	AM222_T2_R - 67-3_T0_R	67-3_T2_R - 67-3_T1_R	AM22_T0_R - 67-3_T1_R	AM22_T1_R - 67-3_T1_R	AM22_T2_R - 67-3_T1_R	AM222_T0_R - 67-3_T1_R	AM222_T1_R - 67-3_T1_R	AM222_T2_R - 67-3_T1_R
M903T687	4.8306	0.00061748	3.20938	0.0075332	305E40_T0_R - 67-3_T0_R	305E40_T0_R - 67-3_T1_R	305E40_T0_R - AM22_T1_R	305E40_T0_R - AM222_T0_R	305E40_T2_R - 305E40_T1_R	305E40_T1_R - 67-3_T1_R	AM22_T0_R - 305E40_T1_R	AM22_T2_R - 305E40_T1_R	AM222_T2_R - 305E40_T1_R	305E40_T2_R - 67-3_T0_R	305E40_T2_R - 67-3_T1_R	305E40_T2_R - AM22_T1_R	305E40_T2_R - AM222_T0_R	67-3_T2_R - 67-3_T0_R	AM22_T0_R - 67-3_T0_R	AM22_T2_R - 67-3_T0_R	AM222_T1_R - 67-3_T0_R	AM222_T2_R - 67-3_T0_R	67-3_T2_R - 67-3_T1_R	AM22_T0_R - 67-3_T1_R	AM22_T2_R - 67-3_T1_R	AM222_T1_R - 67-3_T1_R	AM222_T2_R - 67-3_T1_R	67-3_T2_R - AM22_T1_R	67-3_T2_R - AM222_T0_R	AM22_T0_R - AM22_T1_R	AM22_T0_R - AM222_T0_R	AM22_T2_R - AM22_T1_R	AM222_T1_R - AM22_T1_R	AM222_T2_R - AM22_T1_R	AM22_T2_R - AM222_T0_R	AM222_T1_R - AM222_T0_R	AM222_T2_R - AM222_T0_R
M1032T1123	4.5994	0.0008683	3.06133	0.00088277	67-3_T1_R - 305E40_T0_R	67-3_T2_R - 305E40_T0_R	AM22_T2_R - 305E40_T0_R	AM222_T1_R - 305E40_T0_R	AM222_T2_R - 305E40_T0_R	67-3_T1_R - 305E40_T1_R	67-3_T2_R - 305E40_T1_R	AM22_T2_R - 305E40_T1_R	AM222_T1_R - 305E40_T1_R	AM222_T2_R - 305E40_T1_R	67-3_T1_R - 305E40_T2_R	67-3_T2_R - 305E40_T2_R	AM22_T2_R - 305E40_T2_R	67-3_T1_R - 67-3_T0_R	67-3_T2_R - 67-3_T0_R	AM22_T2_R - 67-3_T0_R	AM222_T1_R - 67-3_T0_R	AM222_T2_R - 67-3_T0_R	67-3_T1_R - AM22_T0_R	67-3_T1_R - AM22_T1_R	67-3_T1_R - AM222_T0_R	67-3_T2_R - AM22_T0_R	67-3_T2_R - AM22_T1_R	67-3_T2_R - AM222_T0_R	AM22_T2_R - AM22_T0_R	AM22_T2_R - AM22_T1_R	AM222_T1_R - AM22_T1_R	AM222_T2_R - AM22_T1_R	AM22_T2_R - AM222_T0_R	AM222_T1_R - AM222_T0_R	AM222_T2_R - AM222_T0_R
M869T830	4.4147	0.0011472	2.94036	0.009997	305E40_T2_R - 305E40_T0_R	AM22_T0_R - 305E40_T0_R	AM22_T2_R - 305E40_T0_R	AM222_T0_R - 305E40_T0_R	AM222_T1_R - 305E40_T0_R	AM222_T2_R - 305E40_T0_R	305E40_T2_R - 305E40_T1_R	AM22_T0_R - 305E40_T1_R	AM22_T1_R - 305E40_T1_R	AM22_T2_R - 305E40_T1_R	AM222_T0_R - 305E40_T1_R	AM222_T1_R - 305E40_T1_R	AM222_T2_R - 305E40_T1_R	305E40_T2_R - 67-3_T0_R	305E40_T2_R - 67-3_T1_R	305E40_T2_R - 67-3_T2_R	AM22_T0_R - 67-3_T0_R	AM22_T2_R - 67-3_T0_R	AM222_T0_R - 67-3_T0_R	AM222_T1_R - 67-3_T0_R	AM222_T2_R - 67-3_T0_R	AM22_T0_R - 67-3_T1_R	AM22_T2_R - 67-3_T1_R	AM222_T0_R - 67-3_T1_R	AM222_T1_R - 67-3_T1_R	AM222_T2_R - 67-3_T1_R	AM22_T0_R - 67-3_T2_R	AM22_T2_R - 67-3_T2_R	AM222_T0_R - 67-3_T2_R	AM222_T1_R - 67-3_T2_R	AM222_T2_R - 67-3_T2_R
M885T1016	3.7336	0.0033705	2.47231	0.0257	67-3_T2_R - 305E40_T0_R	AM22_T2_R - 305E40_T0_R	67-3_T2_R - 305E40_T1_R	AM22_T2_R - 305E40_T1_R	305E40_T2_R - AM22_T1_R	AM22_T2_R - 305E40_T2_R	305E40_T2_R - AM222_T0_R	67-3_T2_R - 67-3_T0_R	AM22_T2_R - 67-3_T0_R	67-3_T2_R - 67-3_T1_R	AM22_T2_R - 67-3_T1_R	67-3_T2_R - AM22_T0_R	67-3_T2_R - AM22_T1_R	67-3_T2_R - AM222_T0_R	67-3_T2_R - AM222_T2_R	AM22_T0_R - AM22_T1_R	AM22_T2_R - AM22_T0_R	AM22_T0_R - AM222_T0_R	AM22_T2_R - AM22_T1_R	AM222_T1_R - AM22_T1_R	AM22_T2_R - AM222_T0_R	AM22_T2_R - AM222_T2_R	AM222_T1_R - AM222_T0_R
M955T1107	3.6009	0.0041982	2.37694	0.028454	67-3_T0_R - 305E40_T0_R	67-3_T1_R - 305E40_T0_R	67-3_T2_R - 305E40_T0_R	AM22_T0_R - 305E40_T0_R	AM22_T1_R - 305E40_T0_R	AM22_T2_R - 305E40_T0_R	67-3_T0_R - 305E40_T1_R	67-3_T1_R - 305E40_T1_R	67-3_T2_R - 305E40_T1_R	AM22_T0_R - 305E40_T1_R	AM22_T1_R - 305E40_T1_R	AM22_T2_R - 305E40_T1_R	305E40_T2_R - AM222_T0_R	67-3_T0_R - AM222_T0_R	67-3_T0_R - AM222_T2_R	67-3_T1_R - AM222_T0_R	67-3_T1_R - AM222_T2_R	67-3_T2_R - AM222_T0_R	67-3_T2_R - AM222_T2_R	AM22_T0_R - AM222_T0_R	AM22_T0_R - AM222_T2_R	AM22_T1_R - AM222_T0_R	AM22_T1_R - AM222_T2_R	AM22_T2_R - AM222_T0_R	AM22_T2_R - AM222_T2_R
M885T649	3.2698	0.0073647	2.13284	0.044925	67-3_T2_R - 305E40_T0_R	67-3_T2_R - 305E40_T1_R	67-3_T2_R - 305E40_T2_R	67-3_T2_R - 67-3_T0_R	67-3_T2_R - 67-3_T1_R	67-3_T2_R - AM22_T0_R	67-3_T2_R - AM22_T1_R	67-3_T2_R - AM22_T2_R	67-3_T2_R - AM222_T0_R	67-3_T2_R - AM222_T1_R	67-3_T2_R - AM222_T2_R
B. Shoot	f.value	p.value	-log10(p)	FDR	Fisher's LSD
Oxalic acid	7.6635	6.1555e-16	15.2107	2.5238e-10	305E40_T0_S - 305E40_T1_S	305E40_T0_S - 305E40_T2_S	305E40_T0_S - AM22_T0_S	305E40_T0_S - AM222_T0_S	305E40_T0_S - AM222_T2_S	67-3_T0_S - 305E40_T1_S	67-3_T1_S - 305E40_T1_S	305E40_T1_S - AM222_T2_S	67-3_T0_S - 305E40_T2_S	67-3_T1_S - 305E40_T2_S	67-3_T2_S - 305E40_T2_S	AM22_T1_S - 305E40_T2_S	AM22_T2_S - 305E40_T2_S	AM222_T1_S - 305E40_T2_S	305E40_T2_S - AM222_T2_S	67-3_T0_S - 67-3_T2_S	67-3_T0_S - AM22_T0_S	67-3_T0_S - AM222_T0_S	67-3_T0_S - AM222_T1_S	67-3_T0_S - AM222_T2_S	67-3_T1_S - AM22_T0_S	67-3_T1_S - AM222_T0_S	67-3_T1_S - AM222_T2_S	67-3_T2_S - AM222_T2_S	AM22_T0_S - AM222_T2_S	AM22_T1_S - AM222_T0_S	AM22_T1_S - AM222_T2_S	AM22_T2_S - AM222_T0_S	AM22_T2_S - AM222_T2_S	AM222_T0_S - AM222_T2_S	AM222_T1_S - AM222_T2_S
Succinic acid	4.5705	2.253e-13	12.6472	4.6187e-08	305E40_T0_S - 305E40_T1_S	67-3_T0_S - 305E40_T0_S	67-3_T1_S - 305E40_T0_S	AM22_T0_S - 305E40_T0_S	AM22_T1_S - 305E40_T0_S	AM22_T2_S - 305E40_T0_S	AM222_T0_S - 305E40_T0_S	AM222_T2_S - 305E40_T0_S	305E40_T2_S - 305E40_T1_S	67-3_T0_S - 305E40_T1_S	67-3_T1_S - 305E40_T1_S	67-3_T2_S - 305E40_T1_S	AM22_T0_S - 305E40_T1_S	AM22_T1_S - 305E40_T1_S	AM22_T2_S - 305E40_T1_S	AM222_T0_S - 305E40_T1_S	AM222_T1_S - 305E40_T1_S	AM222_T2_S - 305E40_T1_S	67-3_T0_S - 305E40_T2_S	67-3_T1_S - 305E40_T2_S	AM22_T0_S - 305E40_T2_S	AM22_T1_S - 305E40_T2_S	AM22_T2_S - 305E40_T2_S	AM222_T0_S - 305E40_T2_S	AM222_T2_S - 305E40_T2_S	67-3_T0_S - 67-3_T2_S	67-3_T0_S - AM222_T1_S	67-3_T1_S - 67-3_T2_S	67-3_T1_S - AM222_T1_S	AM22_T0_S - 67-3_T2_S	AM22_T1_S - 67-3_T2_S	AM22_T2_S - 67-3_T2_S	AM222_T0_S - 67-3_T2_S	AM222_T2_S - 67-3_T2_S	AM22_T1_S - AM22_T0_S	AM22_T2_S - AM22_T0_S	AM22_T0_S - AM222_T1_S	AM22_T1_S - AM222_T0_S	AM22_T1_S - AM222_T1_S	AM22_T1_S - AM222_T2_S	AM22_T2_S - AM222_T0_S	AM22_T2_S - AM222_T1_S	AM22_T2_S - AM222_T2_S	AM222_T0_S - AM222_T1_S	AM222_T2_S - AM222_T1_S
L-Malic acid	1.4687	4.2271e-08	7.37396	0.0057348	305E40_T1_S - 305E40_T0_S	305E40_T2_S - 305E40_T0_S	67-3_T2_S - 305E40_T0_S	AM22_T0_S - 305E40_T0_S	AM22_T1_S - 305E40_T0_S	AM22_T2_S - 305E40_T0_S	AM222_T0_S - 305E40_T0_S	AM222_T1_S - 305E40_T0_S	AM222_T2_S - 305E40_T0_S	305E40_T2_S - 305E40_T1_S	305E40_T1_S - 67-3_T0_S	AM222_T2_S - 305E40_T1_S	305E40_T2_S - 67-3_T0_S	305E40_T2_S - 67-3_T1_S	305E40_T2_S - 67-3_T2_S	305E40_T2_S - AM22_T0_S	305E40_T2_S - AM22_T1_S	305E40_T2_S - AM22_T2_S	305E40_T2_S - AM222_T0_S	305E40_T2_S - AM222_T1_S	305E40_T2_S - AM222_T2_S	67-3_T2_S - 67-3_T0_S	AM22_T0_S - 67-3_T0_S	AM22_T1_S - 67-3_T0_S	AM22_T2_S - 67-3_T0_S	AM222_T0_S - 67-3_T0_S	AM222_T1_S - 67-3_T0_S	AM222_T2_S - 67-3_T0_S	AM222_T2_S - 67-3_T1_S	AM222_T2_S - 67-3_T2_S	AM222_T2_S - AM22_T0_S	AM222_T2_S - AM22_T1_S	AM222_T2_S - AM22_T2_S	AM222_T2_S - AM222_T0_S	AM222_T2_S - AM222_T1_S
L-Glutamic acid	1.4277	5.595e-08	7.2522	0.0057348	67-3_T0_S - 305E40_T0_S	305E40_T0_S - 67-3_T1_S	305E40_T0_S - 67-3_T2_S	AM22_T0_S - 305E40_T0_S	AM22_T1_S - 305E40_T0_S	AM22_T2_S - 305E40_T0_S	AM222_T0_S - 305E40_T0_S	AM222_T1_S - 305E40_T0_S	AM222_T2_S - 305E40_T0_S	67-3_T0_S - 305E40_T1_S	305E40_T1_S - 67-3_T2_S	AM22_T0_S - 305E40_T1_S	AM22_T1_S - 305E40_T1_S	AM22_T2_S - 305E40_T1_S	AM222_T0_S - 305E40_T1_S	AM222_T1_S - 305E40_T1_S	AM222_T2_S - 305E40_T1_S	305E40_T2_S - 67-3_T1_S	305E40_T2_S - 67-3_T2_S	AM22_T0_S - 305E40_T2_S	AM22_T1_S - 305E40_T2_S	AM22_T2_S - 305E40_T2_S	AM222_T2_S - 305E40_T2_S	67-3_T0_S - 67-3_T1_S	67-3_T0_S - 67-3_T2_S	AM22_T0_S - 67-3_T0_S	AM22_T0_S - 67-3_T1_S	AM22_T1_S - 67-3_T1_S	AM22_T2_S - 67-3_T1_S	AM222_T0_S - 67-3_T1_S	AM222_T1_S - 67-3_T1_S	AM222_T2_S - 67-3_T1_S	AM22_T0_S - 67-3_T2_S	AM22_T1_S - 67-3_T2_S	AM22_T2_S - 67-3_T2_S	AM222_T0_S - 67-3_T2_S	AM222_T1_S - 67-3_T2_S	AM222_T2_S - 67-3_T2_S	AM22_T0_S - AM222_T0_S	AM22_T0_S - AM222_T1_S
L-Isoleucine	1.321	1.1972e-07	6.92183	0.0098167	305E40_T0_S - 67-3_T2_S	305E40_T0_S - AM222_T1_S	305E40_T1_S - 67-3_T2_S	305E40_T1_S - AM222_T1_S	305E40_T2_S - 67-3_T0_S	305E40_T2_S - 67-3_T2_S	305E40_T2_S - AM222_T1_S	67-3_T0_S - 67-3_T2_S	AM22_T0_S - 67-3_T0_S	AM22_T1_S - 67-3_T0_S	AM22_T2_S - 67-3_T0_S	AM222_T0_S - 67-3_T0_S	67-3_T0_S - AM222_T1_S	67-3_T1_S - 67-3_T2_S	67-3_T1_S - AM222_T1_S	AM22_T0_S - 67-3_T2_S	AM22_T1_S - 67-3_T2_S	AM22_T2_S - 67-3_T2_S	AM222_T0_S - 67-3_T2_S	AM222_T2_S - 67-3_T2_S	AM22_T0_S - AM222_T1_S	AM22_T1_S - AM222_T1_S	AM22_T2_S - AM222_T1_S	AM222_T0_S - AM222_T1_S	AM222_T2_S - AM222_T1_S
L-Proline	1.2643	1.8309e-07	6.73734	0.012511	305E40_T2_S - 305E40_T0_S	67-3_T0_S - 305E40_T0_S	AM22_T0_S - 305E40_T0_S	AM22_T1_S - 305E40_T0_S	AM22_T2_S - 305E40_T0_S	AM222_T0_S - 305E40_T0_S	305E40_T0_S - AM222_T2_S	305E40_T2_S - 305E40_T1_S	67-3_T0_S - 305E40_T1_S	AM22_T0_S - 305E40_T1_S	AM22_T1_S - 305E40_T1_S	AM22_T2_S - 305E40_T1_S	AM222_T0_S - 305E40_T1_S	AM222_T1_S - 305E40_T1_S	305E40_T2_S - 67-3_T1_S	305E40_T2_S - 67-3_T2_S	305E40_T2_S - AM222_T1_S	305E40_T2_S - AM222_T2_S	67-3_T0_S - 67-3_T1_S	67-3_T0_S - 67-3_T2_S	67-3_T0_S - AM222_T1_S	67-3_T0_S - AM222_T2_S	AM22_T0_S - 67-3_T1_S	AM22_T1_S - 67-3_T1_S	AM22_T2_S - 67-3_T1_S	AM222_T0_S - 67-3_T1_S	AM222_T1_S - 67-3_T1_S	AM22_T0_S - 67-3_T2_S	AM22_T1_S - 67-3_T2_S	AM22_T2_S - 67-3_T2_S	AM222_T0_S - 67-3_T2_S	AM222_T1_S - 67-3_T2_S	AM22_T0_S - AM222_T1_S	AM22_T0_S - AM222_T2_S	AM22_T1_S - AM222_T1_S	AM22_T1_S - AM222_T2_S	AM22_T2_S - AM222_T1_S	AM22_T2_S - AM222_T2_S	AM222_T0_S - AM222_T2_S	AM222_T1_S - AM222_T2_S
D-Glucose	1.133	5.1985e-07	6.28412	0.030448	305E40_T0_S - 305E40_T2_S	305E40_T0_S - 67-3_T2_S	305E40_T0_S - AM22_T2_S	305E40_T0_S - AM222_T1_S	305E40_T1_S - 305E40_T2_S	67-3_T0_S - 305E40_T1_S	305E40_T1_S - 67-3_T2_S	AM22_T1_S - 305E40_T1_S	305E40_T1_S - AM22_T2_S	AM222_T0_S - 305E40_T1_S	67-3_T0_S - 305E40_T2_S	67-3_T1_S - 305E40_T2_S	AM22_T0_S - 305E40_T2_S	AM22_T1_S - 305E40_T2_S	AM222_T0_S - 305E40_T2_S	AM222_T2_S - 305E40_T2_S	67-3_T0_S - 67-3_T1_S	67-3_T0_S - 67-3_T2_S	67-3_T0_S - AM22_T2_S	67-3_T0_S - AM222_T1_S	67-3_T1_S - 67-3_T2_S	AM22_T1_S - 67-3_T1_S	67-3_T1_S - AM22_T2_S	AM222_T0_S - 67-3_T1_S	AM22_T0_S - 67-3_T2_S	AM22_T1_S - 67-3_T2_S	AM222_T0_S - 67-3_T2_S	AM222_T2_S - 67-3_T2_S	AM22_T0_S - AM22_T2_S	AM22_T0_S - AM222_T1_S	AM22_T1_S - AM22_T2_S	AM22_T1_S - AM222_T1_S	AM222_T0_S - AM22_T2_S	AM222_T1_S - AM22_T2_S	AM222_T2_S - AM22_T2_S	AM222_T0_S - AM222_T1_S	AM222_T0_S - AM222_T2_S	AM222_T2_S - AM222_T1_S
M869T830	1.092	7.3433e-07	6.13411	0.037634	305E40_T2_S - 305E40_T0_S	305E40_T0_S - 67-3_T0_S	AM22_T0_S - 305E40_T0_S	AM22_T1_S - 305E40_T0_S	AM22_T2_S - 305E40_T0_S	AM222_T0_S - 305E40_T0_S	AM222_T1_S - 305E40_T0_S	AM222_T2_S - 305E40_T0_S	305E40_T2_S - 305E40_T1_S	AM22_T0_S - 305E40_T1_S	AM22_T1_S - 305E40_T1_S	AM22_T2_S - 305E40_T1_S	AM222_T0_S - 305E40_T1_S	AM222_T1_S - 305E40_T1_S	AM222_T2_S - 305E40_T1_S	305E40_T2_S - 67-3_T0_S	305E40_T2_S - 67-3_T1_S	305E40_T2_S - 67-3_T2_S	67-3_T1_S - 67-3_T0_S	67-3_T2_S - 67-3_T0_S	AM22_T0_S - 67-3_T0_S	AM22_T1_S - 67-3_T0_S	AM22_T2_S - 67-3_T0_S	AM222_T0_S - 67-3_T0_S	AM222_T1_S - 67-3_T0_S	AM222_T2_S - 67-3_T0_S	AM22_T0_S - 67-3_T1_S	AM22_T1_S - 67-3_T1_S	AM222_T0_S - 67-3_T1_S	AM222_T1_S - 67-3_T1_S	AM222_T2_S - 67-3_T1_S	AM22_T0_S - 67-3_T2_S	AM22_T1_S - 67-3_T2_S	AM222_T0_S - 67-3_T2_S	AM222_T1_S - 67-3_T2_S	AM222_T2_S - 67-3_T2_S
L-Glutamine	9.4468	2.768e-06	5.55783	0.01261	305E40_T0_S - 305E40_T1_S	305E40_T0_S - 305E40_T2_S	305E40_T0_S - 67-3_T1_S	305E40_T0_S - AM22_T2_S	305E40_T0_S - AM222_T2_S	67-3_T0_S - 305E40_T1_S	67-3_T2_S - 305E40_T1_S	AM22_T0_S - 305E40_T1_S	AM22_T1_S - 305E40_T1_S	AM22_T2_S - 305E40_T1_S	AM222_T0_S - 305E40_T1_S	AM222_T1_S - 305E40_T1_S	AM222_T2_S - 305E40_T1_S	67-3_T0_S - 305E40_T2_S	67-3_T2_S - 305E40_T2_S	AM22_T0_S - 305E40_T2_S	AM22_T1_S - 305E40_T2_S	AM222_T0_S - 305E40_T2_S	AM222_T1_S - 305E40_T2_S	AM222_T2_S - 305E40_T2_S	67-3_T0_S - 67-3_T1_S	67-3_T2_S - 67-3_T1_S	AM22_T0_S - 67-3_T1_S	AM22_T1_S - 67-3_T1_S	AM22_T2_S - 67-3_T1_S	AM222_T0_S - 67-3_T1_S	AM222_T1_S - 67-3_T1_S	AM222_T2_S - 67-3_T1_S	67-3_T2_S - AM22_T2_S	AM22_T0_S - AM22_T2_S	AM22_T1_S - AM22_T2_S
Shikimic acid	9.3271	3.1036e-06	5.50813	0.12725	305E40_T1_S - 305E40_T0_S	305E40_T2_S - 305E40_T0_S	67-3_T1_S - 305E40_T0_S	67-3_T2_S - 305E40_T0_S	AM22_T0_S - 305E40_T0_S	AM22_T1_S - 305E40_T0_S	AM22_T2_S - 305E40_T0_S	AM222_T0_S - 305E40_T0_S	AM222_T1_S - 305E40_T0_S	AM222_T2_S - 305E40_T0_S	305E40_T1_S - 67-3_T0_S	AM22_T1_S - 305E40_T1_S	AM222_T2_S - 305E40_T1_S	305E40_T2_S - 67-3_T0_S	305E40_T2_S - AM22_T0_S	AM222_T2_S - 305E40_T2_S	67-3_T1_S - 67-3_T0_S	67-3_T2_S - 67-3_T0_S	AM22_T1_S - 67-3_T0_S	AM22_T2_S - 67-3_T0_S	AM222_T0_S - 67-3_T0_S	AM222_T1_S - 67-3_T0_S	AM222_T2_S - 67-3_T0_S	67-3_T1_S - AM22_T0_S	AM222_T2_S - 67-3_T1_S	67-3_T2_S - AM22_T0_S	AM222_T2_S - 67-3_T2_S	AM22_T1_S - AM22_T0_S	AM22_T2_S - AM22_T0_S	AM222_T0_S - AM22_T0_S	AM222_T2_S - AM22_T0_S	AM222_T2_S - AM22_T2_S	AM222_T2_S - AM222_T0_S	AM222_T2_S - AM222_T1_S
L-Phenylalanine	8.6671	5.9485e-06	5.22559	0.20975	305E40_T1_S - 305E40_T0_S	305E40_T2_S - 305E40_T0_S	67-3_T0_S - 305E40_T0_S	67-3_T1_S - 305E40_T0_S	305E40_T0_S - 67-3_T2_S	AM22_T0_S - 305E40_T0_S	AM22_T1_S - 305E40_T0_S	AM22_T2_S - 305E40_T0_S	AM222_T0_S - 305E40_T0_S	AM222_T1_S - 305E40_T0_S	AM222_T2_S - 305E40_T0_S	305E40_T1_S - 67-3_T2_S	305E40_T2_S - 67-3_T2_S	67-3_T0_S - 67-3_T2_S	67-3_T1_S - 67-3_T2_S	AM22_T0_S - 67-3_T2_S	AM22_T1_S - 67-3_T2_S	AM22_T2_S - 67-3_T2_S	AM222_T0_S - 67-3_T2_S	AM222_T1_S - 67-3_T2_S	AM222_T2_S - 67-3_T2_S
M887T705	8.636	6.1391e-06	5.2119	0.20975	305E40_T2_S - 305E40_T0_S	67-3_T2_S - 305E40_T0_S	AM222_T2_S - 305E40_T0_S	305E40_T2_S - 305E40_T1_S	67-3_T2_S - 305E40_T1_S	AM222_T2_S - 305E40_T1_S	305E40_T2_S - 67-3_T0_S	305E40_T2_S - 67-3_T1_S	305E40_T2_S - AM22_T0_S	305E40_T2_S - AM22_T1_S	305E40_T2_S - AM22_T2_S	305E40_T2_S - AM222_T0_S	305E40_T2_S - AM222_T1_S	67-3_T2_S - 67-3_T0_S	AM222_T2_S - 67-3_T0_S	67-3_T2_S - 67-3_T1_S	AM222_T2_S - 67-3_T1_S	67-3_T2_S - AM22_T0_S	67-3_T2_S - AM22_T1_S	67-3_T2_S - AM22_T2_S	67-3_T2_S - AM222_T0_S	67-3_T2_S - AM222_T1_S	AM222_T2_S - AM22_T0_S	AM222_T2_S - AM22_T1_S	AM222_T2_S - AM22_T2_S	AM222_T2_S - AM222_T0_S	AM222_T2_S - AM222_T1_S
M885T703	7.6183	1.8042e-05	4.74372	0.52839	305E40_T2_S - 305E40_T0_S	305E40_T0_S - 67-3_T0_S	67-3_T2_S - 305E40_T0_S	AM222_T2_S - 305E40_T0_S	305E40_T2_S - 305E40_T1_S	305E40_T1_S - 67-3_T0_S	67-3_T2_S - 305E40_T1_S	AM222_T2_S - 305E40_T1_S	305E40_T2_S - 67-3_T0_S	305E40_T2_S - 67-3_T1_S	305E40_T2_S - AM22_T0_S	305E40_T2_S - AM22_T1_S	305E40_T2_S - AM22_T2_S	305E40_T2_S - AM222_T0_S	305E40_T2_S - AM222_T1_S	67-3_T1_S - 67-3_T0_S	67-3_T2_S - 67-3_T0_S	AM22_T0_S - 67-3_T0_S	AM22_T1_S - 67-3_T0_S	AM22_T2_S - 67-3_T0_S	AM222_T2_S - 67-3_T0_S	67-3_T2_S - 67-3_T1_S	67-3_T1_S - AM222_T0_S	67-3_T1_S - AM222_T1_S	AM222_T2_S - 67-3_T1_S	67-3_T2_S - AM22_T0_S	67-3_T2_S - AM22_T1_S	67-3_T2_S - AM22_T2_S	67-3_T2_S - AM222_T0_S	67-3_T2_S - AM222_T1_S	AM222_T2_S - AM22_T0_S	AM222_T2_S - AM22_T1_S	AM222_T2_S - AM22_T2_S	AM222_T2_S - AM222_T0_S	AM222_T2_S - AM222_T1_S
Glyceric acid	6.7976	4.6311e-05	4.33432	0.00012658	305E40_T2_S - 305E40_T0_S	AM22_T2_S - 305E40_T0_S	AM222_T2_S - 305E40_T0_S	305E40_T2_S - 305E40_T1_S	AM22_T2_S - 305E40_T1_S	AM222_T2_S - 305E40_T1_S	305E40_T2_S - 67-3_T0_S	305E40_T2_S - 67-3_T1_S	305E40_T2_S - 67-3_T2_S	305E40_T2_S - AM22_T0_S	305E40_T2_S - AM22_T1_S	305E40_T2_S - AM22_T2_S	305E40_T2_S - AM222_T0_S	305E40_T2_S - AM222_T1_S	AM22_T0_S - 67-3_T0_S	AM22_T1_S - 67-3_T0_S	AM22_T2_S - 67-3_T0_S	AM222_T2_S - 67-3_T0_S	AM22_T0_S - 67-3_T1_S	AM22_T1_S - 67-3_T1_S	AM22_T2_S - 67-3_T1_S	AM222_T0_S - 67-3_T1_S	AM222_T1_S - 67-3_T1_S	AM222_T2_S - 67-3_T1_S	AM22_T2_S - 67-3_T2_S	AM222_T2_S - 67-3_T2_S	AM22_T2_S - AM222_T0_S	AM222_T2_S - AM222_T0_S	AM222_T2_S - AM222_T1_S
D-Fructose	5.7195	1.796e-05	4.74569	0.00046023	305E40_T0_S - 305E40_T1_S	305E40_T0_S - 305E40_T2_S	305E40_T0_S - 67-3_T2_S	305E40_T0_S - AM22_T2_S	305E40_T0_S - AM222_T1_S	305E40_T1_S - AM22_T2_S	67-3_T0_S - 305E40_T2_S	67-3_T1_S - 305E40_T2_S	AM22_T0_S - 305E40_T2_S	AM22_T1_S - 305E40_T2_S	AM222_T2_S - 305E40_T2_S	67-3_T0_S - AM22_T2_S	67-3_T0_S - AM222_T1_S	67-3_T1_S - AM22_T2_S	AM22_T0_S - 67-3_T2_S	67-3_T2_S - AM22_T2_S	AM22_T0_S - AM22_T2_S	AM22_T0_S - AM222_T1_S	AM22_T1_S - AM22_T2_S	AM22_T1_S - AM222_T1_S	AM222_T0_S - AM22_T2_S	AM222_T1_S - AM22_T2_S	AM222_T2_S - AM22_T2_S
L-Asparagine	5.5437	0.00022723	3.64353	0.00054804	305E40_T0_S - 305E40_T1_S	305E40_T0_S - 305E40_T2_S	305E40_T0_S - 67-3_T2_S	305E40_T0_S - AM222_T2_S	67-3_T0_S - 305E40_T1_S	67-3_T1_S - 305E40_T1_S	AM22_T0_S - 305E40_T1_S	AM22_T1_S - 305E40_T1_S	AM222_T0_S - 305E40_T1_S	AM222_T1_S - 305E40_T1_S	67-3_T0_S - 305E40_T2_S	67-3_T1_S - 305E40_T2_S	AM22_T0_S - 305E40_T2_S	AM222_T0_S - 305E40_T2_S	AM222_T1_S - 305E40_T2_S	67-3_T0_S - 67-3_T2_S	67-3_T0_S - AM22_T2_S	67-3_T0_S - AM222_T2_S	67-3_T1_S - 67-3_T2_S	67-3_T1_S - AM22_T2_S	67-3_T1_S - AM222_T2_S	AM22_T0_S - 67-3_T2_S	AM22_T1_S - 67-3_T2_S	AM222_T0_S - 67-3_T2_S	AM222_T1_S - 67-3_T2_S	AM22_T0_S - AM22_T2_S	AM22_T0_S - AM222_T2_S	AM22_T1_S - AM222_T2_S	AM222_T0_S - AM22_T2_S	AM222_T0_S - AM222_T2_S	AM222_T1_S - AM222_T2_S
Pyroglutamic acid	4.4204	0.0011374	2.94409	0.0025278	305E40_T0_S - 67-3_T0_S	305E40_T0_S - AM22_T1_S	305E40_T0_S - AM22_T2_S	305E40_T0_S - AM222_T0_S	305E40_T1_S - AM22_T2_S	305E40_T1_S - AM222_T0_S	305E40_T2_S - 67-3_T0_S	305E40_T2_S - 67-3_T1_S	305E40_T2_S - AM22_T1_S	305E40_T2_S - AM22_T2_S	305E40_T2_S - AM222_T0_S	67-3_T2_S - 67-3_T0_S	AM22_T0_S - 67-3_T0_S	AM222_T2_S - 67-3_T0_S	67-3_T1_S - AM22_T2_S	67-3_T2_S - AM22_T1_S	67-3_T2_S - AM22_T2_S	67-3_T2_S - AM222_T0_S	AM22_T0_S - AM22_T1_S	AM22_T0_S - AM22_T2_S	AM22_T0_S - AM222_T0_S	AM222_T2_S - AM22_T1_S	AM222_T1_S - AM22_T2_S	AM222_T2_S - AM22_T2_S	AM222_T2_S - AM222_T0_S
M862T924	4.401	0.0011714	2.93129	0.0025278	305E40_T2_S - 305E40_T0_S	67-3_T2_S - 305E40_T0_S	AM222_T2_S - 305E40_T0_S	67-3_T2_S - 305E40_T1_S	AM222_T2_S - 305E40_T1_S	305E40_T2_S - 67-3_T0_S	305E40_T2_S - AM22_T1_S	305E40_T2_S - AM22_T2_S	305E40_T2_S - AM222_T0_S	305E40_T2_S - AM222_T1_S	67-3_T2_S - 67-3_T0_S	AM222_T2_S - 67-3_T0_S	67-3_T2_S - 67-3_T1_S	AM222_T2_S - 67-3_T1_S	67-3_T2_S - AM22_T0_S	67-3_T2_S - AM22_T1_S	67-3_T2_S - AM22_T2_S	67-3_T2_S - AM222_T0_S	67-3_T2_S - AM222_T1_S	AM222_T2_S - AM22_T0_S	AM222_T2_S - AM22_T1_S	AM222_T2_S - AM22_T2_S	AM222_T2_S - AM222_T0_S	AM222_T2_S - AM222_T1_S
L-Threonine	4.3215	0.0013232	2.87837	0.0027125	305E40_T2_S - 305E40_T0_S	305E40_T0_S - 67-3_T0_S	305E40_T0_S - AM222_T1_S	305E40_T2_S - 305E40_T1_S	305E40_T2_S - 67-3_T0_S	305E40_T2_S - 67-3_T1_S	305E40_T2_S - 67-3_T2_S	305E40_T2_S - AM22_T0_S	305E40_T2_S - AM22_T1_S	305E40_T2_S - AM22_T2_S	305E40_T2_S - AM222_T0_S	305E40_T2_S - AM222_T1_S	305E40_T2_S - AM222_T2_S	AM22_T0_S - 67-3_T0_S	AM222_T0_S - 67-3_T0_S	AM22_T0_S - AM222_T1_S	AM222_T0_S - AM222_T1_S
L-Leucine	4.1951	0.0016096	2.79328	0.0031426	305E40_T0_S - 67-3_T1_S	305E40_T0_S - AM22_T1_S	305E40_T0_S - AM22_T2_S	305E40_T1_S - AM22_T1_S	305E40_T2_S - 67-3_T1_S	305E40_T2_S - AM22_T1_S	305E40_T2_S - AM22_T2_S	67-3_T0_S - 67-3_T1_S	67-3_T0_S - AM22_T1_S	67-3_T0_S - AM22_T2_S	67-3_T2_S - 67-3_T1_S	AM22_T0_S - 67-3_T1_S	AM222_T2_S - 67-3_T1_S	67-3_T2_S - AM22_T1_S	67-3_T2_S - AM22_T2_S	AM22_T0_S - AM22_T1_S	AM22_T0_S - AM22_T2_S	AM222_T0_S - AM22_T1_S	AM222_T1_S - AM22_T1_S	AM222_T2_S - AM22_T1_S	AM222_T2_S - AM22_T2_S
L-Aspartic acid	4.1259	0.0017939	2.7462	0.0033432	305E40_T0_S - 305E40_T1_S	305E40_T0_S - 67-3_T0_S	305E40_T0_S - 67-3_T2_S	67-3_T1_S - 305E40_T1_S	AM22_T0_S - 305E40_T1_S	AM222_T1_S - 305E40_T1_S	67-3_T1_S - 305E40_T2_S	AM22_T0_S - 305E40_T2_S	AM222_T1_S - 305E40_T2_S	67-3_T1_S - 67-3_T0_S	AM22_T0_S - 67-3_T0_S	AM22_T2_S - 67-3_T0_S	AM222_T1_S - 67-3_T0_S	67-3_T1_S - 67-3_T2_S	67-3_T1_S - AM22_T1_S	67-3_T1_S - AM222_T0_S	AM22_T0_S - 67-3_T2_S	AM22_T2_S - 67-3_T2_S	AM222_T1_S - 67-3_T2_S	AM22_T0_S - AM22_T1_S	AM22_T0_S - AM222_T0_S	AM222_T1_S - AM22_T1_S	AM222_T1_S - AM222_T0_S	AM222_T1_S - AM222_T2_S
Glycine	3.8718	0.0026909	2.5701	0.0047969	305E40_T0_S - 305E40_T2_S	305E40_T0_S - 67-3_T2_S	305E40_T0_S - AM222_T1_S	305E40_T0_S - AM222_T2_S	305E40_T1_S - 305E40_T2_S	305E40_T1_S - 67-3_T2_S	305E40_T1_S - AM222_T1_S	305E40_T1_S - AM222_T2_S	67-3_T0_S - 305E40_T2_S	67-3_T1_S - 305E40_T2_S	AM22_T0_S - 305E40_T2_S	AM22_T1_S - 305E40_T2_S	AM22_T2_S - 305E40_T2_S	AM222_T0_S - 305E40_T2_S	AM22_T0_S - 67-3_T2_S	AM222_T0_S - 67-3_T2_S	AM22_T0_S - AM22_T2_S	AM22_T0_S - AM222_T1_S	AM22_T0_S - AM222_T2_S	AM222_T0_S - AM222_T1_S	AM222_T0_S - AM222_T2_S
L-Cysteine	3.7473	0.0032959	2.48203	0.0054879	305E40_T2_S - 305E40_T0_S	67-3_T1_S - 305E40_T0_S	AM22_T0_S - 305E40_T0_S	AM22_T1_S - 305E40_T0_S	AM22_T2_S - 305E40_T0_S	AM222_T0_S - 305E40_T0_S	AM222_T1_S - 305E40_T0_S	AM222_T2_S - 305E40_T0_S	305E40_T1_S - 67-3_T2_S	AM22_T0_S - 305E40_T1_S	305E40_T2_S - 67-3_T2_S	67-3_T0_S - 67-3_T2_S	67-3_T1_S - 67-3_T2_S	AM22_T0_S - 67-3_T2_S	AM22_T1_S - 67-3_T2_S	AM22_T2_S - 67-3_T2_S	AM222_T0_S - 67-3_T2_S	AM222_T1_S - 67-3_T2_S	AM222_T2_S - 67-3_T2_S
L-Valine	3.738	0.0033463	2.47544	0.0054879	305E40_T1_S - 305E40_T0_S	305E40_T2_S - 305E40_T0_S	67-3_T1_S - 305E40_T0_S	AM22_T0_S - 305E40_T0_S	AM222_T0_S - 305E40_T0_S	AM222_T1_S - 305E40_T0_S	305E40_T1_S - 67-3_T2_S	305E40_T1_S - AM22_T1_S	305E40_T2_S - 67-3_T2_S	305E40_T2_S - AM22_T1_S	AM22_T0_S - 67-3_T0_S	67-3_T1_S - 67-3_T2_S	AM22_T0_S - 67-3_T1_S	AM22_T0_S - 67-3_T2_S	AM222_T0_S - 67-3_T2_S	AM222_T1_S - 67-3_T2_S	AM22_T0_S - AM22_T1_S	AM22_T0_S - AM22_T2_S	AM22_T0_S - AM222_T2_S	AM222_T0_S - AM22_T1_S	AM222_T1_S - AM22_T1_S
L-Serine	3.5731	0.0043979	2.35675	0.0069352	305E40_T2_S - 305E40_T0_S	67-3_T0_S - 305E40_T0_S	67-3_T1_S - 305E40_T0_S	AM22_T0_S - 305E40_T0_S	AM22_T1_S - 305E40_T0_S	AM22_T2_S - 305E40_T0_S	AM222_T0_S - 305E40_T0_S	AM222_T1_S - 305E40_T0_S	AM222_T2_S - 305E40_T0_S	305E40_T2_S - 305E40_T1_S	305E40_T2_S - 67-3_T2_S	67-3_T1_S - 67-3_T2_S	AM22_T0_S - 67-3_T2_S	AM22_T1_S - 67-3_T2_S	AM22_T2_S - 67-3_T2_S	AM222_T0_S - 67-3_T2_S	AM222_T1_S - 67-3_T2_S	AM222_T2_S - 67-3_T2_S
M1118T1173	3.3823	0.006071	2.21674	0.0092189	305E40_T2_S - 305E40_T0_S	67-3_T0_S - 305E40_T0_S	67-3_T1_S - 305E40_T0_S	67-3_T2_S - 305E40_T0_S	AM22_T1_S - 305E40_T0_S	AM22_T2_S - 305E40_T0_S	67-3_T1_S - 305E40_T1_S	67-3_T2_S - 305E40_T1_S	AM22_T1_S - 305E40_T1_S	AM22_T2_S - 305E40_T1_S	305E40_T2_S - AM222_T2_S	67-3_T0_S - AM222_T2_S	67-3_T1_S - AM222_T0_S	67-3_T1_S - AM222_T1_S	67-3_T1_S - AM222_T2_S	67-3_T2_S - AM222_T0_S	67-3_T2_S - AM222_T1_S	67-3_T2_S - AM222_T2_S	AM22_T1_S - AM222_T0_S	AM22_T1_S - AM222_T1_S	AM22_T1_S - AM222_T2_S	AM22_T2_S - AM222_T0_S	AM22_T2_S - AM222_T1_S	AM22_T2_S - AM222_T2_S
Fumaric acid	2.7917	0.017174	1.76513	0.025148	305E40_T2_S - 305E40_T0_S	67-3_T2_S - 305E40_T0_S	AM22_T1_S - 305E40_T0_S	AM22_T2_S - 305E40_T0_S	305E40_T1_S - AM222_T0_S	305E40_T2_S - 67-3_T0_S	305E40_T2_S - AM222_T0_S	305E40_T2_S - AM222_T1_S	AM22_T1_S - 67-3_T0_S	67-3_T2_S - AM222_T0_S	67-3_T2_S - AM222_T1_S	AM22_T1_S - AM222_T0_S	AM22_T1_S - AM222_T1_S	AM22_T2_S - AM222_T0_S	AM22_T2_S - AM222_T1_S	AM222_T2_S - AM222_T0_S

## Sheet: Table S5
Table S5. Results from pathway analysis are presented in a detailed table, from letter “A-F” the pairwise comparison about Genotypes:
A) Shoot_T0_AM222_vs_AM22, Shoot_T0_67-3_vs_AM22 and Shoot_T0_305E40_vs_AM22;
B) Shoot_T1_AM222_vs_AM22; Shoot_T1_67-3_vs_AM22 and Shoot_T1_305E40_vs_AM22;
C) Shoot_T2_AM222_vs_AM22; Shoot_T2_67-3_vs_AM22 and Shoot_T2_305E40_vs_AM22;
D) Shoot_T0_67-3_vs_AM222, Shoot_T1_67-3_vs_AM222 and Shoot_T2_67-3_vs_AM222;
E) Shoot_T0_305E40_vs_AM222, Shoot_T1_305E40_vs_AM222 and Shoot_T2_305E40_vs_AM222;
F) Shoot_T0_67-3_vs_305E40, Shoot_T1_67-3_vs_305E40 and Shoot_T2_67-3_vs_305E40.
Total Cmpd is the total number of compounds in the pathway; Hits is the actually matched number from the user uploaded data;
Raw p is the original p value calculated from the enrichment analysis; Holm p is the p value adjusted by Holm-Bonferroni method;
the FDR p is the p value adjusted using False Discovery Rate; the Impact is the pathway impact value calculated from pathway topology analysis.
Pathways with FDR <0.05 are marked in yellow; pathways with FDR <0.05 and higher Impact value are marked in green.
A.
Shoot_T0_AM222_vs_AM22	Total Cmpd	Hits	Raw p	-log(p)	Holm adjust	FDR	Impact			Shoot_T0_67-3_vs_AM22	Total Cmpd	Hits	Raw p	-log(10)	Holm adjust	FDR	Impact			Shoot_T0_305E40_vs_AM22	Total Cmpd	Hits	Raw p	-log(p)	Holm adjust	FDR	Impact
Glucosinolate biosynthesis	65	4	5.7768e-05	4.23831	0.0024262	0.0019496	0			Carbon fixation in photosynthetic organisms	21	3	0.00082234	3.0849	0.034538	0.0071043	0.05846			Porphyrin and chlorophyll metabolism	48	1	7.7522e-06	5.1106	0.00032559	0.00032559	0
Valine, leucine and isoleucine degradation	37	3	0.00027941	3.5538	0.011456	0.0019496	0			Monobactam biosynthesis	8	1	0.00084575	3.0728	0.034676	0.0071043	0			Glyoxylate and dicarboxylate metabolism	29	9	8.7404e-05	4.0585	0.0035836	0.0018355	0.28209
Valine, leucine and isoleucine biosynthesis	22	4	0.00030438	3.5166	0.012175	0.0019496	0			Lysine biosynthesis	9	1	0.00084575	3.0728	0.034676	0.0071043	0			Butanoate metabolism	17	2	0.00043777	3.3588	0.017511	0.0050539	0
Aminoacyl-tRNA biosynthesis	46	14	0.00036717	3.4351	0.01432	0.0019496	0.11111			beta-Alanine metabolism	18	1	0.00084575	3.0728	0.034676	0.0071043	0			Glutathione metabolism	26	4	0.00048132	3.3176	0.018772	0.0050539	0.14117
Monobactam biosynthesis	8	1	0.00037135	3.4302	0.01432	0.0019496	0			Nicotinate and nicotinamide metabolism	13	1	0.00084575	3.0728	0.034676	0.0071043	0			Sulfur metabolism	15	3	0.00077865	3.1087	0.029589	0.0058958	0.09392
Lysine biosynthesis	9	1	0.00037135	3.4302	0.01432	0.0019496	0			Pyruvate metabolism	22	2	0.0031226	2.5055	0.11554	0.021859	0.15462			Nitrogen metabolism	12	2	0.00084226	3.0746	0.031163	0.0058958	0
beta-Alanine metabolism	18	1	0.00037135	3.4302	0.01432	0.0019496	0			Cyanoamino acid metabolism	29	6	0.0042057	2.3762	0.15141	0.022626	0			Valine, leucine and isoleucine degradation	37	3	0.0010204	2.9912	0.036735	0.0061225	0
Nicotinate and nicotinamide metabolism	13	1	0.00037135	3.4302	0.01432	0.0019496	0			Cysteine and methionine metabolism	46	3	0.0043098	2.3655	0.15141	0.022626	0.04897			Pantothenate and CoA biosynthesis	23	2	0.0018006	2.7446	0.06302	0.0094	0
Cysteine and methionine metabolism	46	3	0.0062137	2.2066	0.21127	0.028997	0.04897			Phenylalanine metabolism	11	1	0.0066899	2.1746	0.22746	0.025543	0.47059			Alanine, aspartate and glutamate metabolism	22	7	0.0020143	2.6959	0.068486	0.0094	0.64748
Arginine biosynthesis	18	4	0.0095992	2.0178	0.31677	0.040316	0.08544			Phenylpropanoid biosynthesis	46	1	0.0066899	2.1746	0.22746	0.025543	0			Valine, leucine and isoleucine biosynthesis	22	4	0.0022499	2.6478	0.074247	0.0094496	0
Pyruvate metabolism	22	2	0.017007	1.7694	0.54422	0.064936	0.15462			Tropane, piperidine and pyridine alkaloid biosynthesis	8	1	0.0066899	2.1746	0.22746	0.025543	0			Arginine biosynthesis	18	4	0.0028269	2.5487	0.09046	0.010337	0.08544
Alanine, aspartate and glutamate metabolism	22	7	0.030916	1.5098	0.95839	0.10723	0.64748			Citrate cycle (TCA cycle)	20	4	0.0073575	2.1333	0.22808	0.025751	0.21839			Aminoacyl-tRNA biosynthesis	46	14	0.0030774	2.5118	0.095399	0.010337	0.11111
Cyanoamino acid metabolism	29	6	0.036669	1.4357	1	0.10723	0			Aminoacyl-tRNA biosynthesis	46	14	0.011661	1.9333	0.34982	0.036023	0.11111			Citrate cycle (TCA cycle)	20	4	0.0031996	2.4949	0.095988	0.010337	0.21839
Carbon fixation in photosynthetic organisms	21	3	0.037122	1.4304	1	0.10723	0.05846			Glycine, serine and threonine metabolism	33	5	0.012696	1.8963	0.36817	0.036023	0.53598			Propanoate metabolism	20	1	0.010321	1.9863	0.2993	0.030962	0
Pantothenate and CoA biosynthesis	23	2	0.038295	1.4169	1	0.10723	0			Phenylalanine, tyrosine and tryptophan biosynthesis	22	2	0.013217	1.8789	0.37009	0.036023	0.08158			Cysteine and methionine metabolism	46	3	0.016232	1.7896	0.4545	0.04545	0.04897
Tyrosine metabolism	16	1	0.04236	1.373	1	0.1112	0.10811			Arginine biosynthesis	18	4	0.013727	1.8624	0.37064	0.036023	0.08544			Thiamine metabolism	22	2	0.017876	1.7477	0.48264	0.046924	0
Amino sugar and nucleotide sugar metabolism	50	2	0.053875	1.2686	1	0.1331	0.0125			Glyoxylate and dicarboxylate metabolism	29	9	0.014581	1.8362	0.3791	0.036023	0.28209			Amino sugar and nucleotide sugar metabolism	50	2	0.023529	1.6284	0.61176	0.055208	0.0125
Arginine and proline metabolism	34	2	0.062216	1.2061	1	0.14517	0.14404			Alanine, aspartate and glutamate metabolism	22	7	0.020155	1.6956	0.50388	0.047029	0.64748			Glucosinolate biosynthesis	65	4	0.02366	1.626	0.61176	0.055208	0
Nitrogen metabolism	12	2	0.081459	1.0891	1	0.18007	0			Glutathione metabolism	26	4	0.022975	1.6388	0.55139	0.050786	0.14117			Arginine and proline metabolism	34	2	0.025314	1.5966	0.61176	0.055956	0.14404
Glycine, serine and threonine metabolism	33	5	0.093905	1.0273	1	0.1972	0.53598			Pantothenate and CoA biosynthesis	23	2	0.027279	1.5642	0.62741	0.057285	0			Cyanoamino acid metabolism	29	6	0.041923	1.3775	0.96423	0.085128	0
Porphyrin and chlorophyll metabolism	48	1	0.10285	0.98778	1	0.20571	0			Thiamine metabolism	22	2	0.048165	1.3173	1	0.096329	0			Sphingolipid metabolism	17	1	0.042564	1.371	0.96423	0.085128	0
Phenylalanine, tyrosine and tryptophan biosynthesis	22	2	0.11976	0.92169	1	0.22863	0.08158			Glycerolipid metabolism	21	1	0.05307	1.2751	1	0.10132	0.00426			Phenylalanine, tyrosine and tryptophan biosynthesis	22	2	0.068596	1.1637	1	0.13096	0.08158
Phenylalanine metabolism	11	1	0.14497	0.83872	1	0.23759	0.47059			Nitrogen metabolism	12	2	0.066412	1.1778	1	0.12127	0			Phenylalanine metabolism	11	1	0.078068	1.1075	1	0.13115	0.47059
Phenylpropanoid biosynthesis	46	1	0.14497	0.83872	1	0.23759	0			Glucosinolate biosynthesis	65	4	0.070059	1.1545	1	0.1226	0			Phenylpropanoid biosynthesis	46	1	0.078068	1.1075	1	0.13115	0
Tropane, piperidine and pyridine alkaloid biosynthesis	8	1	0.14497	0.83872	1	0.23759	0			Porphyrin and chlorophyll metabolism	48	1	0.073973	1.1309	1	0.12427	0			Tropane, piperidine and pyridine alkaloid biosynthesis	8	1	0.078068	1.1075	1	0.13115	0
Citrate cycle (TCA cycle)	20	4	0.14708	0.83246	1	0.23759	0.21839			Purine metabolism	63	1	0.081345	1.0897	1	0.12522	0			Glycerolipid metabolism	21	1	0.094262	1.0257	1	0.15227	0.00426
Glutathione metabolism	26	4	0.16335	0.78688	1	0.2541	0.14117			Pyrimidine metabolism	38	1	0.081345	1.0897	1	0.12522	0			Glycine, serine and threonine metabolism	33	5	0.1144	0.94159	1	0.17795	0.53598
Purine metabolism	63	1	0.17564	0.75537	1	0.25438	0			Arginine and proline metabolism	34	2	0.084041	1.0755	1	0.12522	0.14404			Purine metabolism	63	1	0.2162	0.66515	1	0.29507	0
Pyrimidine metabolism	38	1	0.17564	0.75537	1	0.25438	0			Amino sugar and nucleotide sugar metabolism	50	2	0.086465	1.0632	1	0.12522	0.0125			Pyrimidine metabolism	38	1	0.2162	0.66515	1	0.29507	0
Butanoate metabolism	17	2	0.2127	0.67224	1	0.29777	0			Valine, leucine and isoleucine biosynthesis	22	4	0.1031	0.98673	1	0.14434	0			Monobactam biosynthesis	8	1	0.23184	0.63481	1	0.29507	0
Galactose metabolism	27	3	0.23476	0.62938	1	0.31309	0.04805			Butanoate metabolism	17	2	0.12407	0.90632	1	0.1681	0			Lysine biosynthesis	9	1	0.23184	0.63481	1	0.29507	0
Starch and sucrose metabolism	22	2	0.23854	0.62244	1	0.31309	0.39104			Valine, leucine and isoleucine degradation	37	3	0.14109	0.85051	1	0.18221	0			beta-Alanine metabolism	18	1	0.23184	0.63481	1	0.29507	0
Inositol phosphate metabolism	28	1	0.34387	0.46361	1	0.41264	0.10251			Sulfur metabolism	15	3	0.14316	0.84417	1	0.18221	0.09392			Nicotinate and nicotinamide metabolism	13	1	0.23184	0.63481	1	0.29507	0
Phosphatidylinositol signaling system	26	1	0.34387	0.46361	1	0.41264	0.03285			Tyrosine metabolism	16	1	0.2126	0.67244	1	0.26262	0.10811			Pyruvate metabolism	22	2	0.24961	0.60274	1	0.30834	0.15462
Ascorbate and aldarate metabolism	18	1	0.34387	0.46361	1	0.41264	0			Sphingolipid metabolism	17	1	0.27586	0.55931	1	0.33104	0			Carbon fixation in photosynthetic organisms	21	3	0.27963	0.55341	1	0.33556	0.05846
Glyoxylate and dicarboxylate metabolism	29	9	0.37053	0.43118	1	0.43228	0.28209			Starch and sucrose metabolism	22	2	0.34335	0.46427	1	0.40057	0.39104			Inositol phosphate metabolism	28	1	0.32954	0.48209	1	0.36423	0.10251
Selenocompound metabolism	13	1	0.47562	0.32274	1	0.5399	0			Galactose metabolism	27	3	0.47592	0.32247	1	0.54023	0.04805			Phosphatidylinositol signaling system	26	1	0.32954	0.48209	1	0.36423	0.03285
Glycerolipid metabolism	21	1	0.49317	0.307	1	0.54509	0.00426			Inositol phosphate metabolism	28	1	0.51539	0.28786	1	0.54116	0.10251			Ascorbate and aldarate metabolism	18	1	0.32954	0.48209	1	0.36423	0
Thiamine metabolism	22	2	0.60284	0.21979	1	0.64922	0			Phosphatidylinositol signaling system	26	1	0.51539	0.28786	1	0.54116	0.03285			Galactose metabolism	27	3	0.41801	0.37881	1	0.45016	0.04805
Propanoate metabolism	20	1	0.76476	0.11647	1	0.803	0			Ascorbate and aldarate metabolism	18	1	0.51539	0.28786	1	0.54116	0			Tyrosine metabolism	16	1	0.50894	0.29334	1	0.53438	0.10811
Sulfur metabolism	15	3	0.8081	0.092536	1	0.82781	0.09392			Selenocompound metabolism	13	1	0.55916	0.25246	1	0.5728	0			Selenocompound metabolism	13	1	0.85197	0.069573	1	0.87275	0
Sphingolipid metabolism	17	1	0.9005	0.045518	1	0.9005	0			Propanoate metabolism	20	1	0.90562	0.043054	1	0.90562	0			Starch and sucrose metabolism	22	2	0.99258	0.003236	1	0.99258	0.39104
B)
Shoot_T1_AM222_vs_AM22	Total Cmpd	Hits	Raw p	-log(p)	Holm adjust	FDR	Impact			Shoot_T1_67-3_vs_AM22	Total Cmpd	Hits	Raw p	-log10(p)	Holm adjust	FDR	Impact			Shoot_T1_305E40_vs_AM22	Total Cmpd	Hits	Raw p	-log(p)	Holm adjust	FDR	Impact
Aminoacyl-tRNA biosynthesis	46	14	0.00083552	3.078	0.035092	0.010193	0.11111			Purine metabolism	63	1	8.8134e-09	8.0549	0.0037016	0.0018508	0			Butanoate metabolism	17	2	1.1921e-05	4.9237	0.00050069	0.00029036	0
Monobactam biosynthesis	8	1	0.0014475	2.8394	0.059347	0.010193	0			Pyrimidine metabolism	38	1	8.8134e-09	8.0549	0.0037016	0.0018508	0			Alanine, aspartate and glutamate metabolism	22	7	2.2973e-05	4.6388	0.00094188	0.00029036	0.64748
Lysine biosynthesis	9	1	0.0014475	2.8394	0.059347	0.010193	0			Nitrogen metabolism	12	2	9.6879e-06	5.0138	0.00038752	0.00013563	0			Propanoate metabolism	20	1	2.3449e-05	4.6299	0.00094188	0.00029036	0
beta-Alanine metabolism	18	1	0.0014475	2.8394	0.059347	0.010193	0			Alanine, aspartate and glutamate metabolism	22	7	1.9899e-05	4.7012	0.00077607	0.00020894	0.64748			Citrate cycle (TCA cycle)	20	4	3.1562e-05	4.5008	0.0012309	0.00029036	0.21839
Nicotinate and nicotinamide metabolism	13	1	0.0014475	2.8394	0.059347	0.010193	0			Arginine and proline metabolism	34	2	2.5368e-05	4.5957	0.00096398	0.00021309	0.14404			Sulfur metabolism	15	3	3.4594e-05	4.461	0.0013146	0.00029036	0.09392
Butanoate metabolism	17	2	0.0014561	2.8368	0.059347	0.010193	0			Arginine biosynthesis	18	4	3.5839e-05	4.4456	0.001326	0.00025087	0.08544			Glyoxylate and dicarboxylate metabolism	29	9	4.148e-05	4.3822	0.0015348	0.00029036	0.28209
Valine, leucine and isoleucine biosynthesis	22	4	0.0019292	2.7146	0.069451	0.010608	0			Porphyrin and chlorophyll metabolism	48	1	0.00022195	3.6537	0.0079903	0.0013317	0			Arginine and proline metabolism	34	2	4.8764e-05	4.3119	0.0017555	0.00029259	0.14404
Valine, leucine and isoleucine degradation	37	3	0.0020205	2.6945	0.070717	0.010608	0			Glyoxylate and dicarboxylate metabolism	29	9	0.00028518	3.5449	0.0099814	0.0014972	0.28209			Nitrogen metabolism	12	2	0.00022248	3.6527	0.0077867	0.001168	0
Glucosinolate biosynthesis	65	4	0.0025331	2.5964	0.086125	0.010616	0			Butanoate metabolism	17	2	0.00056901	3.2449	0.019346	0.0026554	0			Purine metabolism	63	1	0.00050027	3.3008	0.017009	0.0021011	0
Propanoate metabolism	20	1	0.0025739	2.5894	0.086125	0.010616	0			Cysteine and methionine metabolism	46	3	0.00072167	3.1417	0.023815	0.0029187	0.04897			Pyrimidine metabolism	38	1	0.00050027	3.3008	0.017009	0.0021011	0
Alanine, aspartate and glutamate metabolism	22	7	0.0027803	2.5559	0.088969	0.010616	0.64748			Aminoacyl-tRNA biosynthesis	46	14	0.00076441	3.1167	0.024461	0.0029187	0.11111			Aminoacyl-tRNA biosynthesis	46	14	0.00069791	3.1562	0.022333	0.0026647	0.11111
Sulfur metabolism	15	3	0.0031209	2.5057	0.096749	0.010923	0.09392			Glycine, serine and threonine metabolism	33	5	0.00087292	3.059	0.027061	0.0030552	0.53598			Porphyrin and chlorophyll metabolism	48	1	0.0012657	2.8977	0.039238	0.0044301	0
Cysteine and methionine metabolism	46	3	0.0034624	2.4606	0.10387	0.011186	0.04897			Monobactam biosynthesis	8	1	0.0028227	2.5493	0.08468	0.0074095	0			Arginine biosynthesis	18	4	0.0024098	2.618	0.072295	0.0077857	0.08544
Galactose metabolism	27	3	0.0059014	2.229	0.17114	0.016603	0.04805			Lysine biosynthesis	9	1	0.0028227	2.5493	0.08468	0.0074095	0			Amino sugar and nucleotide sugar metabolism	50	2	0.0026901	2.5702	0.078014	0.0080704	0.0125
Carbon fixation in photosynthetic organisms	21	3	0.0059297	2.227	0.17114	0.016603	0.05846			beta-Alanine metabolism	18	1	0.0028227	2.5493	0.08468	0.0074095	0			Glutathione metabolism	26	4	0.008772	2.0569	0.24562	0.024562	0.14117
Starch and sucrose metabolism	22	2	0.0075364	2.1228	0.20348	0.019783	0.39104			Nicotinate and nicotinamide metabolism	13	1	0.0028227	2.5493	0.08468	0.0074095	0			Valine, leucine and isoleucine degradation	37	3	0.022331	1.6511	0.60294	0.058619	0
Citrate cycle (TCA cycle)	20	4	0.011967	1.922	0.31115	0.029566	0.21839			Glutathione metabolism	26	4	0.012845	1.8913	0.33398	0.031736	0.14117			Valine, leucine and isoleucine biosynthesis	22	4	0.024845	1.6048	0.64596	0.061381	0
Glyoxylate and dicarboxylate metabolism	29	9	0.012835	1.8916	0.32087	0.029948	0.28209			Carbon fixation in photosynthetic organisms	21	3	0.01962	1.7073	0.49051	0.045781	0.05846			Glucosinolate biosynthesis	65	4	0.029597	1.5288	0.73993	0.06906	0
Arginine biosynthesis	18	4	0.014782	1.8303	0.35477	0.032676	0.08544			Glycerolipid metabolism	21	1	0.069073	1.1607	1	0.14818	0.00426			Pantothenate and CoA biosynthesis	23	2	0.045452	1.3425	1	0.10047	0
Glycine, serine and threonine metabolism	33	5	0.028364	15472	0.65237	0.059564	0.53598			Galactose metabolism	27	3	0.073092	1.1361	1	0.14818	0.04805			Cysteine and methionine metabolism	46	3	0.048403	1.3151	1	0.10165	0.04897
Pantothenate and CoA biosynthesis	23	2	0.034786	14586	0.76529	0.069572	0			Starch and sucrose metabolism	22	2	0.07409	1.1302	1	0.14818	0.39104			Glycerolipid metabolism	21	1	0.053628	1.2706	1	0.10726	0.00426
Porphyrin and chlorophyll metabolism	48	1	0.046628	13314	0.97919	0.089017	0			Sulfur metabolism	15	3	0.10004	0.99984	1	0.19028	0.09392			Galactose metabolism	27	3	0.11891	0.92477	1	0.22543	0.04805
Cyanoamino acid metabolism	29	6	0.058394	12336	1	0.10663	0			Propanoate metabolism	20	1	0.1042	0.98212	1	0.19028	0			Starch and sucrose metabolism	22	2	0.12345	0.90851	1	0.22543	0.39104
Amino sugar and nucleotide sugar metabolism	50	2	0.073293	11349	1	0.12826	0.0125			Pantothenate and CoA biosynthesis	23	2	0.1137	0.94425	1	0.19897	0			Thiamine metabolism	22	2	0.1466	0.83387	1	0.25655	0
Tyrosine metabolism	16	1	0.13694	0.86346	1	0.23006	0.10811			Citrate cycle (TCA cycle)	20	4	0.12169	0.91476	1	0.20443	0.21839			Inositol phosphate metabolism	28	1	0.21939	0.65878	1	0.34128	0.10251
Pyruvate metabolism	22	2	0.14675	0.83341	1	0.23706	0.15462			Cyanoamino acid metabolism	29	6	0.12661	0.89754	1	0.20452	0			Phosphatidylinositol signaling system	26	1	0.21939	0.65878	1	0.34128	0.03285
Arginine and proline metabolism	34	2	0.18506	0.73269	1	0.28787	0.14404			Tyrosine metabolism	16	1	0.16989	0.76984	1	0.26427	0.10811			Ascorbate and aldarate metabolism	18	1	0.21939	0.65878	1	0.34128	0
Nitrogen metabolism	12	2	0.20143	0.69588	1	0.30214	0			Pyruvate metabolism	22	2	0.19963	0.69978	1	0.29944	0.15462			Cyanoamino acid metabolism	29	6	0.23497	0.62899	1	0.35246	0
Inositol phosphate metabolism	28	1	0.22619	0.64552	1	0.30645	0.10251			Inositol phosphate metabolism	28	1	0.26257	0.58075	1	0.35574	0.10251			Phenylalanine, tyrosine and tryptophan biosynthesis	22	2	0.34559	0.46144	1	0.43274	0.08158
Phosphatidylinositol signaling system	26	1	0.22619	0.64552	1	0.30645	0.03285			Phosphatidylinositol signaling system	26	1	0.26257	0.58075	1	0.35574	0.03285			Monobactam biosynthesis	8	1	0.34999	0.45595	1	0.43274	0
Ascorbate and aldarate metabolism	18	1	0.22619	0.64552	1	0.30645	0			Ascorbate and aldarate metabolism	18	1	0.26257	0.58075	1	0.35574	0			Lysine biosynthesis	9	1	0.34999	0.45595	1	0.43274	0
Sphingolipid metabolism	17	1	0.24121	0.6176	1	0.31606	0			Amino sugar and nucleotide sugar metabolism	50	2	0.2911	0.53596	1	0.38207	0.0125			beta-Alanine metabolism	18	1	0.34999	0.45595	1	0.43274	0
Glutathione metabolism	26	4	0.24834	0.60496	1	0.31606	0.14117			Valine, leucine and isoleucine biosynthesis	22	4	0.33556	0.47423	1	0.42707	0			Nicotinate and nicotinamide metabolism	13	1	0.34999	0.45595	1	0.43274	0
Selenocompound metabolism	13	1	0.37199	0.42946	1	0.45952	0			Valine, leucine and isoleucine degradation	37	3	0.36658	0.43583	1	0.45283	0			Sphingolipid metabolism	17	1	0.35031	0.45555	1	0.43274	0
Phenylalanine, tyrosine and tryptophan biosynthesis	22	2	0.46104	0.33626	1	0.55325	0.08158			Selenocompound metabolism	13	1	0.40171	0.39609	1	0.48123	0			Pyruvate metabolism	22	2	0.37314	0.42813	1	0.44777	0.15462
Thiamine metabolism	22	2	0.50076	0.30037	1	0.58422	0			Sphingolipid metabolism	17	1	0.41441	0.38256	1	0.48123	0			Tyrosine metabolism	16	1	0.46837	0.32941	1	0.54643	0.10811
Purine metabolism	63	1	0.63258	0.19888	1	0.69917	0			Glucosinolate biosynthesis	65	4	0.42394	0.3727	1	0.48123	0			Glycine, serine and threonine metabolism	33	5	0.55733	0.25389	1	0.63082	0.53598
Pyrimidine metabolism	38	1	0.63258	0.19888	1	0.69917	0			Phenylalanine, tyrosine and tryptophan biosynthesis	22	2	0.62032	0.20738	1	0.68562	0.08158			Carbon fixation in photosynthetic organisms	21	3	0.57074	0.24356	1	0.63082	0.05846
Glycerolipid metabolism	21	1	0.71299	0.14692	1	0.76783	0.00426			Thiamine metabolism	22	2	0.69883	0.15563	1	0.75259	0			Selenocompound metabolism	13	1	0.85098	0.070081	1	0.88395	0
Phenylalanine metabolism	11	1	0.96818	0.014044	1	0.96818	0.47059			Phenylalanine metabolism	11	1	0.9119	0.040052	1	0.9119	0.47059			Phenylalanine metabolism	11	1	0.88395	0.053571	1	0.88395	0.47059
Phenylpropanoid biosynthesis	46	1	0.96818	0.014044	1	0.96818	0			Phenylpropanoid biosynthesis	46	1	0.9119	0.040052	1	0.9119	0			Phenylpropanoid biosynthesis	46	1	0.88395	0.053571	1	0.88395	0
Tropane, piperidine and pyridine alkaloid biosynthesis	8	1	0.96818	0.014044	1	0.96818	0			Tropane, piperidine and pyridine alkaloid biosynthesis	8	1	0.9119	0.040052	1	0.9119	0			Tropane, piperidine and pyridine alkaloid biosynthesis	8	1	0.88395	0.053571	1	0.88395	0
C)
Shoot_T2_AM222_vs_AM22	Total Cmpd	Hits	Raw p	-log10(p)	Holm adjust	FDR	Impact			Shoot_T2_67-3_vs_AM22	Total Cmpd	Hits	Raw p	-log10(p)	Holm adjust	FDR	Impact			Shoot_T2_305E40_vs_AM22	Total Cmpd	Hits	Raw p	-log(p)	Holm adjust	FDR	Impact
Arginine and proline metabolism	34	2	8.9984e-06	5.0458	0.00037793	0.00037793	0.14404			Propanoate metabolism	20	1	3.1619e-06	5.5	0.0001328	0.0001328	0			Glyoxylate and dicarboxylate metabolism	29	9	4.9058e-06	5.3093	0.00020604	0.00020604	0.28209
Glyoxylate and dicarboxylate metabolism	29	9	0.0012692	2.8965	0.052036	0.026652	0.28209			Aminoacyl-tRNA biosynthesis	46	14	9.5242e-06	5.0212	0.00039049	0.00020001	0.11111			Glycine, serine and threonine metabolism	33	5	0.0003349	3.4751	0.013731	0.0055903	0.53598
Starch and sucrose metabolism	22	2	0.0034837	2.458	0.13935	0.038299	0.39104			Glutathione metabolism	26	4	4.7679e-05	4.3217	0.0019071	0.0006675	0.14117			Glutathione metabolism	26	4	0.00039931	3.3987	0.015972	0.0055903	0.14117
Galactose metabolism	27	3	0.0036475	2.438	0.14225	0.038299	0.04805			Citrate cycle (TCA cycle)	20	4	8.6039e-05	4.0653	0.0033555	0.00073185	0.21839			Carbon fixation in photosynthetic organisms	21	3	0.00067877	3.1683	0.026472	0.0058999	0.05846
Pyruvate metabolism	22	2	0.0089456	2.0484	0.33993	0.075143	0.15462			Glucosinolate biosynthesis	65	4	8.7125e-05	4.0599	0.0033555	0.00073185	0			Citrate cycle (TCA cycle)	20	4	0.00070236	3.1534	0.02669	0.0058999	0.21839
Aminoacyl-tRNA biosynthesis	46	14	0.014457	1.8399	0.53491	0.082176	0.11111			Arginine and proline metabolism	34	2	0.00021037	3.677	0.0077836	0.0014726	0.14404			Butanoate metabolism	17	2	0.0016759	2.7758	0.062007	0.011731	0
Selenocompound metabolism	13	1	0.014872	1.8276	0.5354	0.082176	0			Cyanoamino acid metabolism	29	6	0.00025391	3.5953	0.0091407	0.0015234	0			Pyruvate metabolism	22	2	0.002312	2.636	0.083232	0.013872	0.15462
Citrate cycle (TCA cycle)	20	4	0.015653	1.8054	0.54784	0.082176	0.21839			Alanine, aspartate and glutamate metabolism	22	7	0.00061835	3.2088	0.021642	0.0032463	0.64748			Propanoate metabolism	20	1	0.0064013	2.1937	0.22404	0.033607	0
Carbon fixation in photosynthetic organisms	21	3	0.020366	1.6911	0.69244	0.095041	0.05846			Butanoate metabolism	17	2	0.00086071	3.0651	0.029264	0.0040166	0			Sulfur metabolism	15	3	0.0078026	2.1078	0.26529	0.036412	0.09392
Amino sugar and nucleotide sugar metabolism	50	2	0.030453	1.5164	1	0.1279	0.0125			Glyoxylate and dicarboxylate metabolism	29	9	0.0010251	2.9892	0.033827	0.0043053	0.28209			Thiamine metabolism	22	2	0.012291	1.9104	0.4056	0.051621	0
Glutathione metabolism	26	4	0.046424	1.3333	1	0.17726	0.14117			Sulfur metabolism	15	3	0.0019537	2.7091	0.062518	0.0074595	0.09392			Alanine, aspartate and glutamate metabolism	22	7	0.016333	1.7869	0.52267	0.062364	0.64748
Valine, leucine and isoleucine degradation	37	3	0.10362	0.98454	1	0.35158	0			Selenocompound metabolism	13	1	0.0029702	2.5272	0.092077	0.0097848	0			Aminoacyl-tRNA biosynthesis	46	14	0.020976	1.6783	0.65027	0.068513	0.11111
Valine, leucine and isoleucine biosynthesis	22	4	0.10882	0.96328	1	0.35158	0			Phenylalanine, tyrosine and tryptophan biosynthesis	22	2	0.0036934	2.4326	0.1108	0.0097848	0.08158			Porphyrin and chlorophyll metabolism	48	1	0.022541	1.647	0.67623	0.068513	0
Glucosinolate biosynthesis	65	4	0.15871	0.79939	1	0.45774	0			Phenylalanine metabolism	11	1	0.0037276	2.4286	0.1108	0.0097848	0.47059			Valine, leucine and isoleucine biosynthesis	22	4	0.023604	1.627	0.68451	0.068513	0
Phenylalanine, tyrosine and tryptophan biosynthesis	22	2	0.16348	0.78654	1	0.45774	0.08158			Phenylpropanoid biosynthesis	46	1	0.0037276	2.4286	0.1108	0.0097848	0			Glycerolipid metabolism	21	1	0.024469	1.6114	0.68513	0.068513	0.00426
Propanoate metabolism	20	1	0.29908	0.52421	1	0.78509	0			Tropane, piperidine and pyridine alkaloid biosynthesis	8	1	0.0037276	2.4286	0.1108	0.0097848	0			Selenocompound metabolism	13	1	0.046387	1.3336	1	0.12177	0
Butanoate metabolism	17	2	0.46741	0.3303	1	0.90345	0			Amino sugar and nucleotide sugar metabolism	50	2	0.0053411	2.2724	0.13887	0.013196	0.0125			Valine, leucine and isoleucine degradation	37	3	0.055358	1.2568	1	0.13677	0
Phenylalanine metabolism	11	1	0.49694	0.30369	1	0.90345	0.47059			Porphyrin and chlorophyll metabolism	48	1	0.0074791	2.1262	0.18698	0.016295	0			Nitrogen metabolism	12	2	0.07232	1.1407	1	0.16875	0
Phenylpropanoid biosynthesis	46	1	0.49694	0.30369	1	0.90345	0			Arginine biosynthesis	18	4	0.007481	2.126	0.18698	0.016295	0.08544			Glucosinolate biosynthesis	65	4	0.093977	1.027	1	0.20774	0
Tropane, piperidine and pyridine alkaloid biosynthesis	8	1	0.49694	0.30369	1	0.90345	0			Valine, leucine and isoleucine degradation	37	3	0.0077593	2.1102	0.18698	0.016295	0			Arginine and proline metabolism	34	2	0.12097	0.91733	1	0.25403	0.14404
Sulfur metabolism	15	3	0.51592	0.28741	1	0.90345	0.09392			Valine, leucine and isoleucine biosynthesis	22	4	0.0081798	2.0873	0.18698	0.01636	0			Arginine biosynthesis	18	4	0.19127	0.71835	1	0.38254	0.08544
Tyrosine metabolism	16	1	0.52097	0.28318	1	0.90345	0.10811			Sphingolipid metabolism	17	1	0.0087013	2.0604	0.18698	0.016612	0			Amino sugar and nucleotide sugar metabolism	50	2	0.2207	0.65621	1	0.42133	0.0125
Sphingolipid metabolism	17	1	0.56349	0.24911	1	0.90345	0			Carbon fixation in photosynthetic organisms	21	3	0.010055	1.9976	0.20109	0.018361	0.05846			Starch and sucrose metabolism	22	2	0.26246	0.58094	1	0.47177	0.39104
Porphyrin and chlorophyll metabolism	48	1	0.59183	0.2278	1	0.90345	0			Cysteine and methionine metabolism	46	3	0.013765	1.8612	0.26153	0.024088	0.04897			Purine metabolism	63	1	0.28507	0.54505	1	0.47177	0
Alanine, aspartate and glutamate metabolism	22	7	0.6044	0.21868	1	0.90345	0.64748			Nitrogen metabolism	12	2	0.015429	1.8117	0.27772	0.02592	0			Pyrimidine metabolism	38	1	0.28507	0.54505	1	0.47177	0
Glycerolipid metabolism	21	1	0.615	0.21112	1	0.90345	0.00426			Glycine, serine and threonine metabolism	33	5	0.023681	1.6256	0.40258	0.038254	0.53598			Galactose metabolism	27	3	0.29205	0.53454	1	0.47177	0.04805
Inositol phosphate metabolism	28	1	0.74107	0.13014	1	0.90345	0.10251			Glycerolipid metabolism	21	1	0.03617	1.4417	0.57872	0.056264	0.00426			Inositol phosphate metabolism	28	1	0.36433	0.4385	1	0.52765	0.10251
Phosphatidylinositol signaling system	26	1	0.74107	0.13014	1	0.90345	0.03285			Monobactam biosynthesis	8	1	0.06484	1.1882	0.9726	0.087814	0			Phosphatidylinositol signaling system	26	1	0.36433	0.4385	1	0.52765	0.03285
Ascorbate and aldarate metabolism	18	1	0.74107	0.13014	1	0.90345	0			Lysine biosynthesis	9	1	0.06484	1.1882	0.9726	0.087814	0			Ascorbate and aldarate metabolism	18	1	0.36433	0.4385	1	0.52765	0
Monobactam biosynthesis	8	1	0.74661	0.1269	1	0.90345	0			beta-Alanine metabolism	18	1	0.06484	1.1882	0.9726	0.087814	0			Tyrosine metabolism	16	1	0.52644	0.27865	1	0.73173	0.10811
Lysine biosynthesis	9	1	0.74661	0.1269	1	0.90345	0			Nicotinate and nicotinamide metabolism	13	1	0.06484	1.1882	0.9726	0.087814	0			Cyanoamino acid metabolism	29	6	0.60292	0.21974	1	0.73173	0
beta-Alanine metabolism	18	1	0.74661	0.1269	1	0.90345	0			Thiamine metabolism	22	2	0.066906	1.1745	0.9726	0.087814	0			Monobactam biosynthesis	8	1	0.62635	0.20318	1	0.73173	0
Nicotinate and nicotinamide metabolism	13	1	0.74661	0.1269	1	0.90345	0			Pantothenate and CoA biosynthesis	23	2	0.10281	0.98796	1	0.13085	0			Lysine biosynthesis	9	1	0.62635	0.20318	1	0.73173	0
Purine metabolism	63	1	0.75288	0.12328	1	0.90345	0			Purine metabolism	63	1	0.20461	0.68907	1	0.24553	0			beta-Alanine metabolism	18	1	0.62635	0.20318	1	0.73173	0
Pyrimidine metabolism	38	1	0.75288	0.12328	1	0.90345	0			Pyrimidine metabolism	38	1	0.20461	0.68907	1	0.24553	0			Nicotinate and nicotinamide metabolism	13	1	0.62635	0.20318	1	0.73173	0
Thiamine metabolism	22	2	0.77743	0.10934	1	0.907	0			Inositol phosphate metabolism	28	1	0.33401	0.47625	1	0.36916	0.10251			Sphingolipid metabolism	17	1	0.6272	0.20259	1	0.73173	0
Nitrogen metabolism	12	2	0.84241	0.074478	1	0.93283	0			Phosphatidylinositol signaling system	26	1	0.33401	0.47625	1	0.36916	0.03285			Pantothenate and CoA biosynthesis	23	2	0.65752	0.18209	1	0.74637	0
Cyanoamino acid metabolism	29	6	0.86422	0.063376	1	0.93283	0			Ascorbate and aldarate metabolism	18	1	0.33401	0.47625	1	0.36916	0			Phenylalanine, tyrosine and tryptophan biosynthesis	22	2	0.82501	0.083541	1	0.91185	0.08158
Glycine, serine and threonine metabolism	33	5	0.8662	0.062382	1	0.93283	0.53598			Galactose metabolism	27	3	0.38887	0.41019	1	0.41878	0.04805			Cysteine and methionine metabolism	46	3	0.88321	0.053937	1	0.95115	0.04897
Arginine biosynthesis	18	4	0.90029	0.045617	1	0.94531	0.08544			Starch and sucrose metabolism	22	2	0.42556	0.37104	1	0.44684	0.39104			Phenylalanine metabolism	11	1	0.96444	0.015725	1	0.96444	0.47059
Cysteine and methionine metabolism	46	3	0.9629	0.016419	1	0.98638	0.04897			Tyrosine metabolism	16	1	0.93958	0.027068	1	0.96249	0.10811			Phenylpropanoid biosynthesis	46	1	0.96444	0.015725	1	0.96444	0
Pantothenate and CoA biosynthesis	23	2	0.99363	0.0027772	1	0.99363	0			Pyruvate metabolism	22	2	0.98891	0.004845	1	0.98891	0.15462			Tropane, piperidine and pyridine alkaloid biosynthesis	8	1	0.96444	0.015725	1	0.96444	0
D)
Shoot_T0_67-3_vs_AM222	Total Cmpd	Hits	Raw p	-log(p)	Holm adjust	FDR	Impact			Shoot_T1_67-3_vs_AM222	Total Cmpd	Hits	Raw p	-log(p)	Holm adjust	FDR	Impact			Shoot_T2_67-3_vs_AM222	Total Cmpd	Hits	Raw p	-log(p)	Holm adjust	FDR	Impact
Carbon fixation in photosynthetic organisms	21	3	0.0032194	2.4922	0.13522	0.10651	0.05846			Butanoate metabolism	17	2	4.1352e-06	5.3835	0.00017368	0.00017368	0			Phenylalanine, tyrosine and tryptophan biosynthesis	22	2	3.6175e-05	4.4416	0.0015194	0.00085061	0.08158
Pyruvate metabolism	22	2	0.0050719	2.2948	0.20795	0.10651	0.15462			Propanoate metabolism	20	1	3.865e-05	4.4129	0.0015846	0.00078846	0			Phenylalanine metabolism	11	1	9.7767e-05	4.0098	0.0040085	0.00085061	0.47059
Phenylalanine, tyrosine and tryptophan biosynthesis	22	2	0.020945	1.6789	0.8378	0.21348	0.08158			Porphyrin and chlorophyll metabolism	48	1	5.6318e-05	4.2493	0.0022527	0.00078846	0			Phenylpropanoid biosynthesis	46	1	9.7767e-05	4.0098	0.0040085	0.00085061	0
Arginine and proline metabolism	34	2	0.041108	1.3861	1	0.21348	0.14404			Sulfur metabolism	15	3	0.00037438	3.4267	0.014601	0.0039309	0.09392			Tropane, piperidine and pyridine alkaloid biosynthesis	8	1	9.7767e-05	4.0098	0.0040085	0.00085061	0
Aminoacyl-tRNA biosynthesis	46	14	0.047107	1.3269	1	0.21348	0.11111			Nitrogen metabolism	12	2	0.00059628	3.2246	0.022658	0.0050087	0			Glucosinolate biosynthesis	65	4	0.00010126	3.9945	0.0040085	0.00085061	0
Glyoxylate and dicarboxylate metabolism	29	9	0.047744	1.3211	1	0.21348	0.28209			Glyoxylate and dicarboxylate metabolism	29	9	0.00084815	3.0715	0.031381	0.005937	0.28209			Aminoacyl-tRNA biosynthesis	46	14	0.00012477	3.9039	0.0046165	0.0008734	0.11111
Phenylalanine metabolism	11	1	0.0597	1.224	1	0.21348	0.47059			Alanine, aspartate and glutamate metabolism	22	7	0.0012014	2.9203	0.043252	0.0072086	0.64748			Glyoxylate and dicarboxylate metabolism	29	9	0.0026561	2.5758	0.09562	0.014642	0.28209
Phenylpropanoid biosynthesis	46	1	0.0597	1.224	1	0.21348	0			Monobactam biosynthesis	8	1	0.0029062	2.5367	0.10172	0.011096	0			Cyanoamino acid metabolism	29	6	0.0027889	2.5546	0.097612	0.014642	0
Tropane, piperidine and pyridine alkaloid biosynthesis	8	1	0.0597	1.224	1	0.21348	0			Lysine biosynthesis	9	1	0.0029062	2.5367	0.10172	0.011096	0			Amino sugar and nucleotide sugar metabolism	50	2	0.0059567	2.25	0.20253	0.025508	0.0125
Citrate cycle (TCA cycle)	20	4	0.061939	1.208	1	0.21348	0.21839			beta-Alanine metabolism	18	1	0.0029062	2.5367	0.10172	0.011096	0			Glutathione metabolism	26	4	0.0060734	2.2166	0.20253	0.025508	0.14117
Monobactam biosynthesis	8	1	0.071159	1.1478	1	0.21348	0			Nicotinate and nicotinamide metabolism	13	1	0.0029062	2.5367	0.10172	0.011096	0			Valine, leucine and isoleucine biosynthesis	22	4	0.0081963	2.0864	0.26228	0.031295	0
Lysine biosynthesis	9	1	0.071159	1.1478	1	0.21348	0			Arginine biosynthesis	18	4	0.003272	2.4852	0.10172	0.011452	0.08544			Valine, leucine and isoleucine degradation	37	3	0.0091232	2.0399	0.28282	0.031931	0
beta-Alanine metabolism	18	1	0.071159	1.1478	1	0.21348	0			Purine metabolism	63	1	0.0043536	2.3612	0.13061	0.01249	0			Sphingolipid metabolism	17	1	0.013166	1.8805	0.39499	0.039861	0
Nicotinate and nicotinamide metabolism	13	1	0.071159	1.1478	1	0.21348	0			Pyrimidine metabolism	38	1	0.0043536	2.3612	0.13061	0.01249	0			Pyruvate metabolism	22	2	0.014684	1.8332	0.42584	0.039861	0.15462
Valine, leucine and isoleucine biosynthesis	22	4	0.077991	1.108	1	0.21838	0			Aminoacyl-tRNA biosynthesis	46	14	0.0044608	2.3506	0.13061	0.01249	0.11111			Porphyrin and chlorophyll metabolism	48	1	0.014744	1.8314	0.42584	0.039861	0
Glucosinolate biosynthesis	65	4	0.087079	1.0601	1	0.22858	0			Glutathione metabolism	26	4	0.0079314	2.1007	0.21415	0.02082	0.14117			Butanoate metabolism	17	2	0.015185	1.8186	0.42584	0.039861	0
Cyanoamino acid metabolism	29	6	0.093923	1.0272	1	0.23205	0			Valine, leucine and isoleucine biosynthesis	22	4	0.0091132	2.0403	0.23694	0.022515	0			Arginine and proline metabolism	34	2	0.017686	1.7524	0.45983	0.043694	0.14404
Valine, leucine and isoleucine degradation	37	3	0.11042	0.95694	1	0.25765	0			Valine, leucine and isoleucine degradation	37	3	0.01097	1.9598	0.27425	0.025056	0			Sulfur metabolism	15	3	0.026117	1.5831	0.65293	0.06094	0.09392
Amino sugar and nucleotide sugar metabolism	50	2	0.12164	0.91492	1	0.26889	0.0125			Glucosinolate biosynthesis	65	4	0.011417	1.9425	0.27425	0.025056	0			Alanine, aspartate and glutamate metabolism	22	7	0.030061	1.522	0.72147	0.066451	0.64748
Glycine, serine and threonine metabolism	33	5	0.14935	0.82579	1	0.31364	0.53598			Pantothenate and CoA biosynthesis	23	2	0.011932	1.9233	0.27442	0.025056	0			Nitrogen metabolism	12	2	0.034672	1.46	0.79746	0.071684	0
Purine metabolism	63	1	0.17581	0.75496	1	0.33485	0			Cysteine and methionine metabolism	46	3	0.015575	1.8076	0.34265	0.03115	0.04897			Glycerolipid metabolism	21	1	0.035842	1.4456	0.79746	0.071684	0.00426
Pyrimidine metabolism	38	1	0.17581	0.75496	1	0.33485	0			Arginine and proline metabolism	34	2	0.037746	1.4231	0.79266	0.07206	0.14404			Cysteine and methionine metabolism	46	3	0.041291	1.3841	0.86712	0.075764	0.04897
Cysteine and methionine metabolism	46	3	0.18337	0.73667	1	0.33485	0.04897			Citrate cycle (TCA cycle)	20	4	0.073204	1.1355	1	0.13368	0.21839			Arginine biosynthesis	18	4	0.04149	1.3821	0.86712	0.075764	0.08544
Tyrosine metabolism	16	1	0.25358	0.59588	1	0.41944	0.10811			Glycerolipid metabolism	21	1	0.07705	1.1132	1	0.13484	0.00426			Pantothenate and CoA biosynthesis	23	2	0.047453	1.3237	0.9016	0.083042	0
Inositol phosphate metabolism	28	1	0.26964	0.56922	1	0.41944	0.10251			Glycine, serine and threonine metabolism	33	5	0.10219	0.99059	1	0.17168	0.53598			Starch and sucrose metabolism	22	2	0.053158	1.2744	0.95684	0.088272	0.39104
Phosphatidylinositol signaling system	26	1	0.26964	0.56922	1	0.41944	0.03285			Sphingolipid metabolism	17	1	0.1292	0.88872	1	0.20871	0			Carbon fixation in photosynthetic organisms	21	3	0.054645	1.2625	0.95684	0.088272	0.05846
Ascorbate and aldarate metabolism	18	1	0.26964	0.56922	1	0.41944	0			Cyanoamino acid metabolism	29	6	0.27591	0.55923	1	0.42919	0			Citrate cycle (TCA cycle)	20	4	0.071877	1.1434	1	0.11181	0.21839
Sphingolipid metabolism	17	1	0.29905	0.52425	1	0.44858	0			Tyrosine metabolism	16	1	0.34905	0.45711	1	0.52357	0.10811			Thiamine metabolism	22	2	0.097873	1.0093	1	0.14067	0
Arginine biosynthesis	18	4	0.32309	0.49068	1	0.46792	0.08544			Thiamine metabolism	22	2	0.42682	0.36976	1	0.61815	0			Galactose metabolism	27	3	0.099175	1.0036	1	0.14067	0.04805
Thiamine metabolism	22	2	0.39425	0.40422	1	0.55196	0			Carbon fixation in photosynthetic organisms	21	3	0.44436	0.35227	1	0.6221	0.05846			Glycine, serine and threonine metabolism	33	5	0.10048	0.99794	1	0.14067	0.53598
Glycerolipid metabolism	21	1	0.42725	0.36932	1	0.57886	0.00426			Amino sugar and nucleotide sugar metabolism	50	2	0.57265	0.24211	1	0.77585	0.0125			Propanoate metabolism	20	1	0.11492	0.9396	1	0.1557	0
Galactose metabolism	27	3	0.52584	0.27915	1	0.68093	0.04805			Pyruvate metabolism	22	2	0.61241	0.21296	1	0.80378	0.15462			Purine metabolism	63	1	0.25246	0.59781	1	0.28994	0
Selenocompound metabolism	13	1	0.53502	0.27163	1	0.68093	0			Starch and sucrose metabolism	22	2	0.65708	0.18238	1	0.82601	0.39104			Pyrimidine metabolism	38	1	0.25246	0.59781	1	0.28994	0
Alanine, aspartate and glutamate metabolism	22	7	0.56023	0.25164	1	0.69204	0.64748			Phenylalanine, tyrosine and tryptophan biosynthesis	22	2	0.66867	0.17479	1	0.82601	0.08158			Monobactam biosynthesis	8	1	0.25542	0.59274	1	0.28994	0
Nitrogen metabolism	12	2	0.61474	0.21131	1	0.71904	0			Galactose metabolism	27	3	0.74271	0.12918	1	0.83283	0.04805			Lysine biosynthesis	9	1	0.25542	0.59274	1	0.28994	0
Sulfur metabolism	15	3	0.61632	0.21019	1	0.71904	0.09392			Inositol phosphate metabolism	28	1	0.76603	0.11575	1	0.83283	0.10251			beta-Alanine metabolism	18	1	0.25542	0.59274	1	0.28994	0
Pantothenate and CoA biosynthesis	23	2	0.65982	0.18057	1	0.74899	0			Phosphatidylinositol signaling system	26	1	0.76603	0.11575	1	0.83283	0.03285			Nicotinate and nicotinamide metabolism	13	1	0.25542	0.59274	1	0.28994	0
Propanoate metabolism	20	1	0.69041	0.16089	1	0.76309	0			Ascorbate and aldarate metabolism	18	1	0.76603	0.11575	1	0.83283	0			Inositol phosphate metabolism	28	1	0.29546	0.52949	1	0.31024	0.10251
Glutathione metabolism	26	4	0.71872	0.14344	1	0.774	0.14117			Selenocompound metabolism	13	1	0.77334	0.11163	1	0.83283	0			Phosphatidylinositol signaling system	26	1	0.29546	0.52949	1	0.31024	0.03285
Starch and sucrose metabolism	22	2	0.76198	0.11805	1	0.80008	0.39104			Phenylalanine metabolism	11	1	0.85455	0.068261	1	0.85455	0.47059			Ascorbate and aldarate metabolism	18	1	0.29546	0.52949	1	0.31024	0
Butanoate metabolism	17	2	0.88205	0.054509	1	0.90356	0			Phenylpropanoid biosynthesis	46	1	0.85455	0.068261	1	0.85455	0			Tyrosine metabolism	16	1	0.35652	0.44792	1	0.36521	0.10811
Porphyrin and chlorophyll metabolism	48	1	0.94866	0.02289	1	0.94866	0			Tropane, piperidine and pyridine alkaloid biosynthesis	8	1	0.85455	0.068261	1	0.85455	0			Selenocompound metabolism	13	1	0.74201	0.12959	1	0.74201	0
E)
Shoot_T0_305E40_vs_AM222	Total Cmpd	Hits	Raw p	-log(p)	Holm adjust	FDR	Impact			Shoot_T1_305E40_vs_AM222	Total Cmpd	Hits	Raw p	-log(p)	Holm adjust	FDR	Impact			Shoot_T2_305E40_vs_AM222	Total Cmpd	Hits	Raw p	-log(p)	Holm adjust	FDR	Impact
Aminoacyl-tRNA biosynthesis	46	14	0.00032006	3.4948	0.013443	0.013443	0.11111			Propanoate metabolism	20	1	1.5415e-08	7.8121	0.0064743	0.0064743	0			Glyoxylate and dicarboxylate metabolism	29	9	3.1407e-06	5.503	0.00013191	0.00013191	0.28209
Cysteine and methionine metabolism	46	3	0.0075148	2.1241	0.30811	0.091409	0.04897			Butanoate metabolism	17	2	1.3972e-06	5.8547	0.57287	0.22981	0			Pyruvate metabolism	22	2	7.2944e-05	4.137	0.0029907	0.0015318	0.15462
Glyoxylate and dicarboxylate metabolism	29	9	0.0080192	2.0959	0.32077	0.091409	0.28209			Sulfur metabolism	15	3	1.6415e-06	5.7848	0.65661	0.22981	0.09392			Arginine and proline metabolism	34	2	0.0029733	2.5268	0.11893	0.032333	0.14404
Amino sugar and nucleotide sugar metabolism	50	2	0.0087056	2.0602	0.33952	0.091409	0.0125			Cysteine and methionine metabolism	46	3	1.4984e-05	4.8244	0.00058437	0.00015733	0.04897			Tyrosine metabolism	16	1	0.0038002	2.4202	0.14821	0.032333	0.10811
Sulfur metabolism	15	3	0.015853	1.7999	0.60241	0.11279	0.09392			Alanine, aspartate and glutamate metabolism	22	7	4.3708e-05	4.3594	0.0016609	0.00036715	0.64748			Aminoacyl-tRNA biosynthesis	46	14	0.0038492	2.4146	0.14821	0.032333	0.11111
Pantothenate and CoA biosynthesis	23	2	0.018856	1.7245	0.69769	0.11279	0			Glyoxylate and dicarboxylate metabolism	29	9	0.00017306	3.7618	0.0064032	0.0012114	0.28209			Alanine, aspartate and glutamate metabolism	22	7	0.0070583	2.1513	0.26116	0.049408	0.64748
Glucosinolate biosynthesis	65	4	0.022472	1.6484	0.80899	0.11279	0			Citrate cycle (TCA cycle)	20	4	0.00020305	3.6924	0.0073097	0.0012183	0.21839			Glycine, serine and threonine metabolism	33	5	0.0096081	2.0174	0.34589	0.05447	0.53598
Alanine, aspartate and glutamate metabolism	22	7	0.025973	1.5855	0.90907	0.11279	0.64748			Monobactam biosynthesis	8	1	0.00046768	3.3301	0.016369	0.0017857	0			Arginine biosynthesis	18	4	0.010819	1.9658	0.37865	0.05447	0.08544
Nitrogen metabolism	12	2	0.026088	1.5836	0.90907	0.11279	0			Lysine biosynthesis	9	1	0.00046768	3.3301	0.016369	0.0017857	0			Phenylalanine, tyrosine and tryptophan biosynthesis	22	2	0.011672	1.9329	0.39685	0.05447	0.08158
Glutathione metabolism	26	4	0.028217	1.5495	0.93115	0.11279	0.14117			beta-Alanine metabolism	18	1	0.00046768	3.3301	0.016369	0.0017857	0			Nitrogen metabolism	12	2	0.024386	1.6129	0.80474	0.10242	0
Citrate cycle (TCA cycle)	20	4	0.031339	1.5039	1	0.11279	0.21839			Nicotinate and nicotinamide metabolism	13	1	0.00046768	3.3301	0.016369	0.0017857	0			Carbon fixation in photosynthetic organisms	21	3	0.029512	1.53	0.94439	0.1072	0.05846
Cyanoamino acid metabolism	29	6	0.03797	1.4206	1	0.11279	0			Porphyrin and chlorophyll metabolism	48	1	0.00092493	3.0339	0.028673	0.0032373	0			Citrate cycle (TCA cycle)	20	4	0.030628	1.5139	0.94945	0.1072	0.21839
Sphingolipid metabolism	17	1	0.039358	1.405	1	0.11279	0			Glucosinolate biosynthesis	65	4	0.0014086	2.8512	0.042257	0.004265	0			Selenocompound metabolism	13	1	0.042085	1.3759	1	0.13597	0
Valine, leucine and isoleucine degradation	37	3	0.041636	1.3805	1	0.11279	0			Valine, leucine and isoleucine biosynthesis	22	4	0.0015033	2.8229	0.043597	0.004265	0			Valine, leucine and isoleucine biosynthesis	22	4	0.049631	1.3043	1	0.14889	0
Propanoate metabolism	20	1	0.042143	1.3753	1	0.11279	0			Valine, leucine and isoleucine degradation	37	3	0.0015232	2.8172	0.043597	0.004265	0			Glutathione metabolism	26	4	0.066714	1.1758	1	0.1868	0.14117
Butanoate metabolism	17	2	0.043703	1.3595	1	0.11279	0			Carbon fixation in photosynthetic organisms	21	3	0.0025993	2.5851	0.070182	0.0064344	0.05846			Galactose metabolism	27	3	0.078318	1.1061	1	0.20558	0.04805
Porphyrin and chlorophyll metabolism	48	1	0.047916	1.3195	1	0.11279	0			Arginine biosynthesis	18	4	0.0026044	2.5843	0.070182	0.0064344	0.08544			Starch and sucrose metabolism	22	2	0.086504	1.063	1	0.21372	0.39104
Selenocompound metabolism	13	1	0.049694	1.3037	1	0.11279	0			Nitrogen metabolism	12	2	0.0027617	2.5588	0.070182	0.0064439	0			Porphyrin and chlorophyll metabolism	48	1	0.10261	0.9888	1	0.22485	0
Carbon fixation in photosynthetic organisms	21	3	0.051223	1.2905	1	0.11279	0.05846			Aminoacyl-tRNA biosynthesis	46	14	0.0035866	2.4453	0.086079	0.0079284	0.11111			Purine metabolism	63	1	0.10846	0.96475	1	0.22485	0
Phenylalanine, tyrosine and tryptophan biosynthesis	22	2	0.053711	1.2699	1	0.11279	0.08158			Cyanoamino acid metabolism	29	6	0.0048845	2.3112	0.11234	0.010257	0			Pyrimidine metabolism	38	1	0.10846	0.96475	1	0.22485	0
Valine, leucine and isoleucine biosynthesis	22	4	0.058806	1.2306	1	0.11761	0			Purine metabolism	63	1	0.0083958	2.0759	0.18471	0.016028	0			Glycerolipid metabolism	21	1	0.11846	0.92645	1	0.22485	0.00426
Arginine and proline metabolism	34	2	0.072758	1.1381	1	0.1389	0.14404			Pyrimidine metabolism	38	1	0.0083958	2.0759	0.18471	0.016028	0			Butanoate metabolism	17	2	0.12239	0.91224	1	0.22485	0
Arginine biosynthesis	18	4	0.07609	1.1187	1	0.13895	0.08544			Glycine, serine and threonine metabolism	33	5	0.010904	1.9624	0.21808	0.019912	0.53598			Phenylalanine metabolism	11	1	0.13384	0.87342	1	0.22485	0.47059
Thiamine metabolism	22	2	0.094397	1.025	1	0.155	0			Glutathione metabolism	26	4	0.012882	1.89	0.24476	0.022544	0.14117			Phenylpropanoid biosynthesis	46	1	0.13384	0.87342	1	0.22485	0
Purine metabolism	63	1	0.10076	0.99672	1	0.155	0			Pantothenate and CoA biosynthesis	23	2	0.016622	1.7793	0.29919	0.027924	0			Tropane, piperidine and pyridine alkaloid biosynthesis	8	1	0.13384	0.87342	1	0.22485	0
Pyrimidine metabolism	38	1	0.10076	0.99672	1	0.155	0			Glycerolipid metabolism	21	1	0.042533	1.3713	0.72307	0.068708	0.00426			Thiamine metabolism	22	2	0.15599	0.80692	1	0.25188	0
Phenylalanine metabolism	11	1	0.10703	0.97051	1	0.155	0.47059			Arginine and proline metabolism	34	2	0.071897	1.1433	1	0.11184	0.14404			Amino sugar and nucleotide sugar metabolism	50	2	0.16315	0.78742	1	0.25188	0.0125
Phenylpropanoid biosynthesis	46	1	0.10703	0.97051	1	0.155	0			Thiamine metabolism	22	2	0.085788	1.0666	1	0.12868	0			Glucosinolate biosynthesis	65	4	0.16792	0.7749	1	0.25188	0
Tropane, piperidine and pyridine alkaloid biosynthesis	8	1	0.10703	0.97051	1	0.155	0			Starch and sucrose metabolism	22	2	0.14584	0.83614	1	0.21121	0.39104			Valine, leucine and isoleucine degradation	37	3	0.2018	0.69508	1	0.29226	0
Monobactam biosynthesis	8	1	0.15018	0.8234	1	0.19113	0			Pyruvate metabolism	22	2	0.15867	0.7995	1	0.22214	0.15462			Propanoate metabolism	20	1	0.2436	0.61332	1	0.34104	0
Lysine biosynthesis	9	1	0.15018	0.8234	1	0.19113	0			Tyrosine metabolism	16	1	0.19484	0.71033	1	0.25554	0.10811			Inositol phosphate metabolism	28	1	0.31462	0.50221	1	0.40043	0.10251
beta-Alanine metabolism	18	1	0.15018	0.8234	1	0.19113	0			Galactose metabolism	27	3	0.20004	0.69888	1	0.25554	0.04805			Phosphatidylinositol signaling system	26	1	0.31462	0.50221	1	0.40043	0.03285
Nicotinate and nicotinamide metabolism	13	1	0.15018	0.8234	1	0.19113	0			Sphingolipid metabolism	17	1	0.20078	0.69728	1	0.25554	0			Ascorbate and aldarate metabolism	18	1	0.31462	0.50221	1	0.40043	0
Pyruvate metabolism	22	2	0.18465	0.73364	1	0.2281	0.15462			Phenylalanine metabolism	11	1	0.70779	0.15009	1	0.82576	0.47059			Sulfur metabolism	15	3	0.332	0.47886	1	0.41012	0.09392
Glycine, serine and threonine metabolism	33	5	0.23742	0.62448	1	0.2849	0.53598			Phenylpropanoid biosynthesis	46	1	0.70779	0.15009	1	0.82576	0			Sphingolipid metabolism	17	1	0.36159	0.44178	1	0.43391	0
Galactose metabolism	27	3	0.26505	0.57667	1	0.29668	0.04805			Tropane, piperidine and pyridine alkaloid biosynthesis	8	1	0.70779	0.15009	1	0.82576	0			Cyanoamino acid metabolism	29	6	0.39127	0.40752	1	0.45648	0
Inositol phosphate metabolism	28	1	0.27549	0.55989	1	0.29668	0.10251			Amino sugar and nucleotide sugar metabolism	50	2	0.74544	0.12759	1	0.84617	0.0125			Pantothenate and CoA biosynthesis	23	2	0.48014	0.31863	1	0.54502	0
Phosphatidylinositol signaling system	26	1	0.27549	0.55989	1	0.29668	0.03285			Phenylalanine, tyrosine and tryptophan biosynthesis	22	2	0.80281	0.095387	1	0.88732	0.08158			Monobactam biosynthesis	8	1	0.83961	0.075921	1	0.86009	0
Ascorbate and aldarate metabolism	18	1	0.27549	0.55989	1	0.29668	0			Inositol phosphate metabolism	28	1	0.95212	0.021307	1	0.97534	0.10251			Lysine biosynthesis	9	1	0.83961	0.075921	1	0.86009	0
Starch and sucrose metabolism	22	2	0.38357	0.41616	1	0.40275	0.39104			Phosphatidylinositol signaling system	26	1	0.95212	0.021307	1	0.97534	0.03285			beta-Alanine metabolism	18	1	0.83961	0.075921	1	0.86009	0
Glycerolipid metabolism	21	1	0.65679	0.18257	1	0.67281	0.00426			Ascorbate and aldarate metabolism	18	1	0.95212	0.021307	1	0.97534	0			Nicotinate and nicotinamide metabolism	13	1	0.83961	0.075921	1	0.86009	0
Tyrosine metabolism	16	1	0.88456	0.053274	1	0.88456	0.10811			Selenocompound metabolism	13	1	0.99807	0.00084076	1	0.99807	0			Cysteine and methionine metabolism	46	3	0.93643	0.028522	1	0.93643	0.04897
F)
Shoot_T0_67-3_vs_305E40	Total Cmpd	Hits	Raw p	-log(p)	Holm adjust	FDR	Impact			Shoot_T1_67-3_vs_305E40	Total Cmpd	Hits	Raw p	-log(p)	Holm adjust	FDR	Impact			Shoot_T2_67-3_vs_305E40	Total Cmpd	Hits	Raw p	-log(p)	Holm adjust	FDR	Impact
Aminoacyl-tRNA biosynthesis	46	14	0.00034462	3.4627	0.014474	0.014474	0.11111			Propanoate metabolism	20	1	8.2916e-08	7.0814	0.034825	0.034825	0			Purine metabolism	63	1	4.0072e-07	6.3972	0.01683	0.084151	0
Sulfur metabolism	15	3	0.0010174	2.9925	0.041713	0.021365	0.09392			Butanoate metabolism	17	2	3.3118e-07	6.4799	0.13578	0.069548	0			Pyrimidine metabolism	38	1	4.0072e-07	6.3972	0.01683	0.084151	0
Glyoxylate and dicarboxylate metabolism	29	9	0.0026727	2.5731	0.10691	0.037417	0.28209			Sulfur metabolism	15	3	1.967e-06	5.7062	0.78678	0.27537	0.09392			Phenylalanine metabolism	11	1	3.2147e-06	5.4929	0.00012859	0.27004	0.47059
Propanoate metabolism	20	1	0.0070637	2.151	0.27549	0.042414	0			Glyoxylate and dicarboxylate metabolism	29	9	5.8683e-06	5.2315	0.00022886	0.61617	0.28209			Phenylpropanoid biosynthesis	46	1	3.2147e-06	5.4929	0.00012859	0.27004	0
Cysteine and methionine metabolism	46	3	0.0077134	2.1128	0.29311	0.042414	0.04897			Alanine, aspartate and glutamate metabolism	22	7	2.0555e-05	4.6871	0.00078109	0.00017266	0.64748			Tropane, piperidine and pyridine alkaloid biosynthesis	8	1	3.2147e-06	5.4929	0.00012859	0.27004	0
Glutathione metabolism	26	4	0.0078038	2.1077	0.29311	0.042414	0.14117			Cysteine and methionine metabolism	46	3	5.9712e-05	4.2239	0.0022093	0.00041132	0.04897			Phenylalanine, tyrosine and tryptophan biosynthesis	22	2	4.4424e-06	5.3524	0.00016437	0.31097	0.08158
Thiamine metabolism	22	2	0.0079117	2.1017	0.29311	0.042414	0			Arginine and proline metabolism	34	2	7.6888e-05	4.1141	0.002768	0.00041132	0.14404			Glucosinolate biosynthesis	65	4	5.6384e-06	5.2488	0.00020298	0.03383	0
Nitrogen metabolism	12	2	0.0080788	2.0927	0.29311	0.042414	0			Porphyrin and chlorophyll metabolism	48	1	8.7942e-05	4.0558	0.003078	0.00041132	0			Valine, leucine and isoleucine degradation	37	3	1.3464e-05	4.8708	0.00047125	0.70687	0
Alanine, aspartate and glutamate metabolism	22	7	0.011505	1.9391	0.39118	0.053691	0.64748			Citrate cycle (TCA cycle)	20	4	8.814e-05	4.0548	0.003078	0.00041132	0.21839			Selenocompound metabolism	13	1	0.00029299	4.5331	0.00099618	0.00013255	0
Sphingolipid metabolism	17	1	0.014776	1.8304	0.4876	0.057597	0			Arginine biosynthesis	18	4	0.0005897	3.2294	0.01946	0.0024322	0.08544			Aminoacyl-tRNA biosynthesis	46	14	3.1559e-05	4.5009	0.0010415	0.00013255	0.11111
Butanoate metabolism	17	2	0.015085	1.8215	0.4876	0.057597	0			Monobactam biosynthesis	8	1	0.00081072	3.0911	0.025943	0.0024322	0			Valine, leucine and isoleucine biosynthesis	22	4	0.35945	4.4444	0.0011503	0.00013725	0
Arginine biosynthesis	18	4	0.030714	1.5127	0.95214	0.1075	0.08544			Lysine biosynthesis	9	1	0.00081072	3.0911	0.025943	0.0024322	0			Cyanoamino acid metabolism	29	6	0.00012394	3.9068	0.0038423	0.0004338	0
Cyanoamino acid metabolism	29	6	0.035718	1.4471	1	0.1154	0			beta-Alanine metabolism	18	1	0.00081072	3.0911	0.025943	0.0024322	0			Glyoxylate and dicarboxylate metabolism	29	9	0.00024648	3.6082	0.0073945	0.00079633	0.28209
Porphyrin and chlorophyll metabolism	48	1	0.040437	1.3932	1	0.11659	0			Nicotinate and nicotinamide metabolism	13	1	0.00081072	3.0911	0.025943	0.0024322	0			Glycerolipid metabolism	21	1	0.00034951	3.4565	0.010136	0.0010485	0.00426
Arginine and proline metabolism	34	2	0.045186	1.345	1	0.11659	0.14404			Nitrogen metabolism	12	2	0.0018946	2.7225	0.053049	0.0053049	0			Nitrogen metabolism	12	2	0.0010733	2.9693	0.030051	0.0028926	0
Monobactam biosynthesis	8	1	0.05657	1.2474	1	0.11659	0			Glycine, serine and threonine metabolism	33	5	0.0027037	2.568	0.073001	0.0070973	0.53598			Arginine and proline metabolism	34	2	0.0011019	2.9578	0.030051	0.0028926	0.14404
Lysine biosynthesis	9	1	0.05657	1.2474	1	0.11659	0			Cyanoamino acid metabolism	29	6	0.0056978	2.2443	0.14814	0.014077	0			Alanine, aspartate and glutamate metabolism	22	7	0.0012737	2.8949	0.033116	0.0031468	0.64748
beta-Alanine metabolism	18	1	0.05657	1.2474	1	0.11659	0			Carbon fixation in photosynthetic organisms	21	3	0.0081313	2.0898	0.20328	0.018973	0.05846			Glycine, serine and threonine metabolism	33	5	0.0035974	2.444	0.089935	0.0083939	0.53598
Nicotinate and nicotinamide metabolism	13	1	0.05657	1.2474	1	0.11659	0			Glutathione metabolism	26	4	0.026518	1.5765	0.63644	0.05862	0.14117			Arginine biosynthesis	18	4	0.0038566	2.4138	0.092559	0.0085251	0.08544
Glycine, serine and threonine metabolism	33	5	0.060223	1.2202	1	0.11659	0.53598			Aminoacyl-tRNA biosynthesis	46	14	0.047018	1.3277	1	0.098738	0.11111			Pyruvate metabolism	22	2	0.0046777	2.33	0.10759	0.0094269	0.15462
Purine metabolism	63	1	0.061069	1.2142	1	0.11659	0			Pantothenate and CoA biosynthesis	23	2	0.11285	0.94749	1	0.22571	0			Glutathione metabolism	26	4	0.0047134	2.3267	0.10759	0.0094269	0.14117
Pyrimidine metabolism	38	1	0.061069	1.2142	1	0.11659	0			Pyruvate metabolism	22	2	0.17275	0.76257	1	0.3298	0.15462			Carbon fixation in photosynthetic organisms	21	3	0.0061617	2.2103	0.12939	0.011763	0.05846
Pantothenate and CoA biosynthesis	23	2	0.073061	1.1363	1	0.13342	0			Thiamine metabolism	22	2	0.19214	0.71638	1	0.35087	0			Citrate cycle (TCA cycle)	20	4	0.0081151	2.0907	0.1623	0.014819	0.21839
Selenocompound metabolism	13	1	0.087635	1.0573	1	0.15336	0			Tyrosine metabolism	16	1	0.21632	0.66491	1	0.37855	0.10811			Sphingolipid metabolism	17	1	0.017224	1.7639	0.32725	0.030141	0
Carbon fixation in photosynthetic organisms	21	3	0.095334	1.0208	1	0.16016	0.05846			Glycerolipid metabolism	21	1	0.22861	0.64091	1	0.38406	0.00426			Pantothenate and CoA biosynthesis	23	2	0.02108	1.6761	0.37945	0.035415	0
Phenylalanine metabolism	11	1	0.14926	0.82607	1	0.22389	0.47059			Valine, leucine and isoleucine degradation	37	3	0.24952	0.60289	1	0.3962	0			Butanoate metabolism	17	2	0.025775	1.5888	0.43817	0.041339	0
Phenylpropanoid biosynthesis	46	1	0.14926	0.82607	1	0.22389	0			Glucosinolate biosynthesis	65	4	0.2547	0.59397	1	0.3962	0			Porphyrin and chlorophyll metabolism	48	1	0.026575	1.5755	0.43817	0.041339	0
Tropane, piperidine and pyridine alkaloid biosynthesis	8	1	0.14926	0.82607	1	0.22389	0			Valine, leucine and isoleucine biosynthesis	22	4	0.26589	0.57529	1	0.39884	0			Sulfur metabolism	15	3	0.049263	1.3075	0.73894	0.073894	0.09392
Phenylalanine, tyrosine and tryptophan biosynthesis	22	2	0.16389	0.78545	1	0.23246	0.08158			Starch and sucrose metabolism	22	2	0.29059	0.53672	1	0.42086	0.39104			Thiamine metabolism	22	2	0.053123	1.2747	0.74372	0.076936	0
Citrate cycle (TCA cycle)	20	4	0.16604	0.77979	1	0.23246	0.21839			Phenylalanine, tyrosine and tryptophan biosynthesis	22	2	0.3201	0.49472	1	0.44813	0.08158			Amino sugar and nucleotide sugar metabolism	50	2	0.057067	1.2436	0.74372	0.079894	0.0125
Glucosinolate biosynthesis	65	4	0.1781	0.74933	1	0.2413	0			Amino sugar and nucleotide sugar metabolism	50	2	0.34465	0.46263	1	0.46694	0.0125			Cysteine and methionine metabolism	46	3	0.077024	1.1134	0.92429	0.10435	0.04897
Valine, leucine and isoleucine biosynthesis	22	4	0.29883	0.52458	1	0.39221	0			Galactose metabolism	27	3	0.35623	0.44826	1	0.46756	0.04805			Tyrosine metabolism	16	1	0.25685	0.59033	1	0.33711	0.10811
Glycerolipid metabolism	21	1	0.42632	0.37026	1	0.51268	0.00426			Phenylalanine metabolism	11	1	0.48829	0.31132	1	0.58595	0.47059			Propanoate metabolism	20	1	0.41303	0.38402	1	0.52568	0
Inositol phosphate metabolism	28	1	0.43944	0.3571	1	0.51268	0.10251			Phenylpropanoid biosynthesis	46	1	0.48829	0.31132	1	0.58595	0			Monobactam biosynthesis	8	1	0.48657	0.31286	1	0.55232	0
Phosphatidylinositol signaling system	26	1	0.43944	0.3571	1	0.51268	0.03285			Tropane, piperidine and pyridine alkaloid biosynthesis	8	1	0.48829	0.31132	1	0.58595	0			Lysine biosynthesis	9	1	0.48657	0.31286	1	0.55232	0
Ascorbate and aldarate metabolism	18	1	0.43944	0.3571	1	0.51268	0			Sphingolipid metabolism	17	1	0.54269	0.26544	1	0.63314	0			beta-Alanine metabolism	18	1	0.48657	0.31286	1	0.55232	0
Galactose metabolism	27	3	0.45658	0.34048	1	0.51829	0.04805			Purine metabolism	63	1	0.77746	0.10932	1	0.82392	0			Nicotinate and nicotinamide metabolism	13	1	0.48657	0.31286	1	0.55232	0
Amino sugar and nucleotide sugar metabolism	50	2	0.48657	0.31285	1	0.52592	0.0125			Pyrimidine metabolism	38	1	0.77746	0.10932	1	0.82392	0			Inositol phosphate metabolism	28	1	0.86275	0.064117	1	0.90588	0.10251
Valine, leucine and isoleucine degradation	37	3	0.48835	0.31127	1	0.52592	0			Inositol phosphate metabolism	28	1	0.80431	0.094579	1	0.82392	0.10251			Phosphatidylinositol signaling system	26	1	0.86275	0.064117	1	0.90588	0.03285
Starch and sucrose metabolism	22	2	0.52135	0.28287	1	0.54742	0.39104			Phosphatidylinositol signaling system	26	1	0.80431	0.094579	1	0.82392	0.03285			Ascorbate and aldarate metabolism	18	1	0.86275	0.064117	1	0.90588	0
Tyrosine metabolism	16	1	0.76003	0.11917	1	0.77857	0.10811			Ascorbate and aldarate metabolism	18	1	0.80431	0.094579	1	0.82392	0			Starch and sucrose metabolism	22	2	0.94912	0.022679	1	0.95769	0.39104
Pyruvate metabolism	22	2	0.93376	0.029766	1	0.93376	0.15462			Selenocompound metabolism	13	1	0.94223	0.025845	1	0.94223	0			Galactose metabolism	27	3	0.95769	0.018775	1	0.95769	0.04805

## Sheet: Table S6
Table S6. KEGG reference pathways a subset of 121 genes were obtained overall.
		ko00970 Aminoacyl-tRNA biosynthesis
SMEL_008g312160.1	K01867	ko:K01867 WARS; tryptophanyl-tRNA synthetase [EC:6.1.1.2]
SMEL_002g161810.1	K01869	ko:K01869 LARS; leucyl-tRNA synthetase [EC:6.1.1.4]
SMEL_001g115360.1	K01872	ko:K01872 AARS; alanyl-tRNA synthetase [EC:6.1.1.7]
SMEL_003g186060.1	K01872	ko:K01872 AARS; alanyl-tRNA synthetase [EC:6.1.1.7]
SMEL_009g321940.1	K01873	ko:K01873 VARS; valyl-tRNA synthetase [EC:6.1.1.9]
SMEL_005g228020.1	K01874	ko:K01874 MARS; methionyl-tRNA synthetase [EC:6.1.1.10]
SMEL_000g033540.1	K01876	ko:K01876 DARS2; aspartyl-tRNA synthetase [EC:6.1.1.12]
SMEL_011g377500.1	K01880	ko:K01880 GARS; glycyl-tRNA synthetase [EC:6.1.1.14]
SMEL_006g261320.1	K01881	ko:K01881 PARS; prolyl-tRNA synthetase [EC:6.1.1.15]
SMEL_001g123750.1	K01885	ko:K01885 EARS; glutamyl-tRNA synthetase [EC:6.1.1.17]
SMEL_010g337250.1	K01886	ko:K01886 QARS; glutaminyl-tRNA synthetase [EC:6.1.1.18]
SMEL_002g167350.1	K01889	ko:K01889 FARSA; phenylalanyl-tRNA synthetase alpha chain [EC:6.1.1.20]
SMEL_012g398810.1	K01890	ko:K01890 FARSB; phenylalanyl-tRNA synthetase beta chain [EC:6.1.1.20]
SMEL_001g123420.1	K01892	ko:K01892 HARS; histidyl-tRNA synthetase [EC:6.1.1.21]
SMEL_003g195740.1	K01892	ko:K01892 HARS; histidyl-tRNA synthetase [EC:6.1.1.21]
SMEL_010g360980.1	K01893	ko:K01893 NARS; asparaginyl-tRNA synthetase [EC:6.1.1.22]
SMEL_005g230780.1	K22503	ko:K22503 DARS1; aspartyl-tRNA synthetase [EC:6.1.1.12]
		ko00250 Alanine, aspartate and glutamate metabolism
SMEL_003g183980.1	K00264	ko:K00264 GLT1; glutamate synthase (NADH) [EC:1.4.1.14]
SMEL_001g116660.1	K00764	ko:K00764 purF; amidophosphoribosyltransferase [EC:2.4.2.14]
SMEL_005g242150.1	K00830	ko:K00830 AGXT; alanine-glyoxylate transaminase / serine-glyoxylate transaminase / serine-pyruvate transaminase [EC:2.6.1.44 2.6.1.45 2.6.1.51]
SMEL_001g150880.1	K01580	ko:K01580 E4.1.1.15; glutamate decarboxylase [EC:4.1.1.15]
SMEL_005g228550.1	K01580	ko:K01580 E4.1.1.15; glutamate decarboxylase [EC:4.1.1.15]
SMEL_011g362280.1	K01580	ko:K01580 E4.1.1.15; glutamate decarboxylase [EC:4.1.1.15]
SMEL_010g360640.1	K01939	ko:K01939 purA; adenylosuccinate synthase [EC:6.3.4.4]
SMEL_010g351040.1	K01940	ko:K01940 argG; argininosuccinate synthase [EC:6.3.4.5]
SMEL_006g267290.1	K01955	ko:K01955 carB; carbamoyl-phosphate synthase large subunit [EC:6.3.5.5]
SMEL_007g282260.1	K13566	ko:K13566 NIT2; omega-amidase [EC:3.5.1.3]
SMEL_009g333060.1	K17761	ko:K17761 SSADH; succinate-semialdehyde dehydrogenase, mitochondrial [EC:1.2.1.24]
SMEL_004g219260.1	K13051	ko:K13051 ASRGL1; L-asparaginase / beta-aspartyl-peptidase [EC:3.5.1.1 3.4.19.5]
SMEL_006g262400.1	K13051	ko:K13051 ASRGL1; L-asparaginase / beta-aspartyl-peptidase [EC:3.5.1.1 3.4.19.5]
		ko00500 Starch and sucrose metabolism
SMEL_007g277290.1	K00695	ko:K00695 E2.4.1.13; sucrose synthase [EC:2.4.1.13]
SMEL_007g277310.1	K00695	ko:K00695 E2.4.1.13; sucrose synthase [EC:2.4.1.13]
SMEL_009g330200.1	K00695	ko:K00695 E2.4.1.13; sucrose synthase [EC:2.4.1.13]
SMEL_012g382160.1	K00695	ko:K00695 E2.4.1.13; sucrose synthase [EC:2.4.1.13]
SMEL_000g085440.1	K00703	ko:K00703 glgA; starch synthase [EC:2.4.1.21]
SMEL_007g279110.1	K00705	ko:K00705 malQ; 4-alpha-glucanotransferase [EC:2.4.1.25]
SMEL_003g198560.1	K00844	ko:K00844 HK; hexokinase [EC:2.7.1.1]
SMEL_006g259800.1	K00844	ko:K00844 HK; hexokinase [EC:2.7.1.1]
SMEL_006g265210.1	K00847	ko:K00847 E2.7.1.4; fructokinase [EC:2.7.1.4]
SMEL_007g292070.1	K00975	ko:K00975 glgC; glucose-1-phosphate adenylyltransferase [EC:2.7.7.27]
SMEL_003g180460.1	K01087	ko:K01087 otsB; trehalose 6-phosphate phosphatase [EC:3.1.3.12]
SMEL_001g129900.1	K01177	ko:K01177 E3.2.1.2; beta-amylase [EC:3.2.1.2]
SMEL_001g139740.1	K01177	ko:K01177 E3.2.1.2; beta-amylase [EC:3.2.1.2]
SMEL_001g123620.1	K01179	ko:K01179 E3.2.1.4; endoglucanase [EC:3.2.1.4]
SMEL_003g177010.1	K01179	ko:K01179 E3.2.1.4; endoglucanase [EC:3.2.1.4]
SMEL_003g180470.1	K01193	ko:K01193 INV; beta-fructofuranosidase [EC:3.2.1.26]
SMEL_000g109110.1	K01194	ko:K01194 TREH; alpha,alpha-trehalase [EC:3.2.1.28]
SMEL_003g196100.1	K01513	ko:K01513 ENPP1_3; ectonucleotide pyrophosphatase/phosphodiesterase family member 1/3 [EC:3.1.4.1 3.6.1.9]
SMEL_004g216950.1	K01810	ko:K01810 GPI; glucose-6-phosphate isomerase [EC:5.3.1.9]
SMEL_010g341280.1	K01810	ko:K01810 GPI; glucose-6-phosphate isomerase [EC:5.3.1.9]
SMEL_006g268370.1	K05349	ko:K05349 bglX; beta-glucosidase [EC:3.2.1.21]
SMEL_012g395700.1	K05349	ko:K05349 bglX; beta-glucosidase [EC:3.2.1.21]
SMEL_003g195970.1	K05350	ko:K05350 bglB; beta-glucosidase [EC:3.2.1.21]
SMEL_000g036450.1	K13679	ko:K13679 WAXY; granule-bound starch synthase [EC:2.4.1.242]
SMEL_000g017060.1	K16055	ko:K16055 TPS; trehalose 6-phosphate synthase/phosphatase [EC:2.4.1.15 3.1.3.12]
SMEL_000g078070.1	K16055	ko:K16055 TPS; trehalose 6-phosphate synthase/phosphatase [EC:2.4.1.15 3.1.3.12]
SMEL_001g151160.1	K16055	ko:K16055 TPS; trehalose 6-phosphate synthase/phosphatase [EC:2.4.1.15 3.1.3.12]
SMEL_007g294680.1	K16055	ko:K16055 TPS; trehalose 6-phosphate synthase/phosphatase [EC:2.4.1.15 3.1.3.12]
SMEL_000g085330.1	K19891	ko:K19891 GN1_2_3; glucan endo-1,3-beta-glucosidase 1/2/3 [EC:3.2.1.39]
SMEL_001g152910.1	K19892	ko:K19892 GN4; glucan endo-1,3-beta-glucosidase 4 [EC:3.2.1.39]
SMEL_000g089310.1	K19893	ko:K19893 GN5_6; glucan endo-1,3-beta-glucosidase 5/6 [EC:3.2.1.39]
SMEL_008g312130.1	K19893	ko:K19893 GN5_6; glucan endo-1,3-beta-glucosidase 5/6 [EC:3.2.1.39]
SMEL_000g067190.1	K00688	ko:K00688 PYG; glycogen phosphorylase [EC:2.4.1.1]
		ko00260 Glycine, serine and threonine metabolism
SMEL_003g189340.1	K00058	ko:K00058 serA; D-3-phosphoglycerate dehydrogenase / 2-oxoglutarate reductase [EC:1.1.1.95 1.1.1.399]
SMEL_003g196890.1	K00058	ko:K00058 serA; D-3-phosphoglycerate dehydrogenase / 2-oxoglutarate reductase [EC:1.1.1.95 1.1.1.399]
SMEL_001g151200.1	K00133	ko:K00133 asd; aspartate-semialdehyde dehydrogenase [EC:1.2.1.11]
SMEL_003g178610.1	K00276	ko:K00276 AOC3; primary-amine oxidase [EC:1.4.3.21]
SMEL_008g307820.1	K00281	ko:K00281 GLDC; glycine dehydrogenase [EC:1.4.4.2]
SMEL_001g124710.1	K00382	ko:K00382 DLD; dihydrolipoamide dehydrogenase [EC:1.8.1.4]
SMEL_005g227630.1	K00382	ko:K00382 DLD; dihydrolipoamide dehydrogenase [EC:1.8.1.4]
SMEL_005g239330.1	K00382	ko:K00382 DLD; dihydrolipoamide dehydrogenase [EC:1.8.1.4]
SMEL_000g004730.1	K00600	ko:K00600 glyA; glycine hydroxymethyltransferase [EC:2.1.2.1]
SMEL_001g122190.1	K00600	ko:K00600 glyA; glycine hydroxymethyltransferase [EC:2.1.2.1]
SMEL_005g228290.1	K00600	ko:K00600 glyA; glycine hydroxymethyltransferase [EC:2.1.2.1]
SMEL_005g241460.1	K00600	ko:K00600 glyA; glycine hydroxymethyltransferase [EC:2.1.2.1]
SMEL_005g242150.1	K00830	ko:K00830 AGXT; alanine-glyoxylate transaminase / serine-glyoxylate transaminase / serine-pyruvate transaminase [EC:2.6.1.44 2.6.1.45 2.6.1.51]
SMEL_000g061420.1	K00831	ko:K00831 serC; phosphoserine aminotransferase [EC:2.6.1.52]
SMEL_001g151210.1	K00928	ko:K00928 lysC; aspartate kinase [EC:2.7.2.4]
SMEL_004g201720.1	K01696	ko:K01696 trpB; tryptophan synthase beta chain [EC:4.2.1.20]
SMEL_003g197730.1	K01733	ko:K01733 thrC; threonine synthase [EC:4.2.3.1]
SMEL_006g260300.1	K01733	ko:K01733 thrC; threonine synthase [EC:4.2.3.1]
SMEL_010g357190.1	K01754	ko:K01754 E4.3.1.19; threonine dehydratase [EC:4.3.1.19]
SMEL_000g091530.1	K02437	ko:K02437 gcvH; glycine cleavage system H protein
SMEL_003g199000.1	K15919	ko:K15919 HPR2_3; glyoxylate/hydroxypyruvate reductase [EC:1.1.1.79 1.1.1.81]
		ko00360 Phenylalanine metabolism
SMEL_007g293920.1	K00074	ko:K00074 paaH; 3-hydroxybutyryl-CoA dehydrogenase [EC:1.1.1.157]
SMEL_003g178610.1	K00276	ko:K00276 AOC3; primary-amine oxidase [EC:1.4.3.21]
SMEL_009g325840.1	K01593	ko:K01593 DDC; aromatic-L-amino-acid/L-tryptophan decarboxylase [EC:4.1.1.28 4.1.1.105]
SMEL_001g141930.1	K01692	ko:K01692 paaF; enoyl-CoA hydratase [EC:4.2.1.17]
SMEL_008g301360.1	K22427	ko:K22427 AADC; phenylalanine decarboxylase [EC:4.1.1.53]
SMEL_001g120570.1	K10775	ko:K10775 PAL; phenylalanine ammonia-lyase [EC:4.3.1.24]
SMEL_005g230690.1	K10775	ko:K10775 PAL; phenylalanine ammonia-lyase [EC:4.3.1.24]
		ko00630 Glyoxylate and dicarboxylate metabolism
SMEL_009g332450.1	K00025	ko:K00025 MDH1; malate dehydrogenase [EC:1.1.1.37]
SMEL_003g193140.1	K00026	ko:K00026 MDH2; malate dehydrogenase [EC:1.1.1.37]
SMEL_002g164000.1	K00122	ko:K00122 FDH; formate dehydrogenase [EC:1.17.1.9]
SMEL_008g307820.1	K00281	ko:K00281 GLDC; glycine dehydrogenase [EC:1.4.4.2]
SMEL_001g124710.1	K00382	ko:K00382 DLD; dihydrolipoamide dehydrogenase [EC:1.8.1.4]
SMEL_005g227630.1	K00382	ko:K00382 DLD; dihydrolipoamide dehydrogenase [EC:1.8.1.4]
SMEL_005g239330.1	K00382	ko:K00382 DLD; dihydrolipoamide dehydrogenase [EC:1.8.1.4]
SMEL_000g004730.1	K00600	ko:K00600 glyA; glycine hydroxymethyltransferase [EC:2.1.2.1]
SMEL_001g122190.1	K00600	ko:K00600 glyA; glycine hydroxymethyltransferase [EC:2.1.2.1]
SMEL_005g228290.1	K00600	ko:K00600 glyA; glycine hydroxymethyltransferase [EC:2.1.2.1]
SMEL_005g241460.1	K00600	ko:K00600 glyA; glycine hydroxymethyltransferase [EC:2.1.2.1]
SMEL_005g242150.1	K00830	ko:K00830 AGXT; alanine-glyoxylate transaminase / serine-glyoxylate transaminase / serine-pyruvate transaminase [EC:2.6.1.44 2.6.1.45 2.6.1.51]
SMEL_000g029880.1	K01602	ko:K01602 rbcS; ribulose-bisphosphate carboxylase small chain [EC:4.1.1.39]
SMEL_007g288630.1	K01637	ko:K01637 E4.1.3.1; isocitrate lyase [EC:4.1.3.1]
SMEL_001g134630.1	K01647	ko:K01647 CS; citrate synthase [EC:2.3.3.1]
SMEL_007g288510.1	K01681	ko:K01681 ACO; aconitate hydratase [EC:4.2.1.3]
SMEL_010g339270.1	K01681	ko:K01681 ACO; aconitate hydratase [EC:4.2.1.3]
SMEL_001g141400.1	K01913	ko:K01913 AAE7; acetate/butyrate---CoA ligase [EC:6.2.1.1 6.2.1.2]
SMEL_000g091530.1	K02437	ko:K02437 gcvH; glycine cleavage system H protein
SMEL_000g061370.1	K03781	ko:K03781 katE; catalase [EC:1.11.1.6]
SMEL_005g238230.1	K03781	ko:K03781 katE; catalase [EC:1.11.1.6]
SMEL_003g199000.1	K15919	ko:K15919 HPR2_3; glyoxylate/hydroxypyruvate reductase [EC:1.1.1.79 1.1.1.81]
SMEL_000g004100.1	K18121	ko:K18121 GLYR; glyoxylate/succinic semialdehyde reductase [EC:1.1.1.79 1.1.1.-]
SMEL_003g181850.1	K22133	ko:K22133 AAE3; oxalate---CoA ligase [EC:6.2.1.8]
SMEL_004g202790.1	K11517	ko:K11517 HAO; (S)-2-hydroxy-acid oxidase [EC:1.1.3.15]
SMEL_007g292380.1	K11517	ko:K11517 HAO; (S)-2-hydroxy-acid oxidase [EC:1.1.3.15]
		ko00950 Isoquinoline alkaloid biosynthesis
SMEL_003g178610.1	K00276	ko:K00276 AOC3; primary-amine oxidase [EC:1.4.3.21]
SMEL_000g064350.1	K00422	ko:K00422 E1.10.3.1; polyphenol oxidase [EC:1.10.3.1]
SMEL_008g312510.1	K00422	ko:K00422 E1.10.3.1; polyphenol oxidase [EC:1.10.3.1]
SMEL_009g325840.1	K01593	ko:K01593 DDC; aromatic-L-amino-acid/L-tryptophan decarboxylase [EC:4.1.1.28 4.1.1.105]

## Sheet: Table S7
Table S7. Pearson's correlation coefficient (A) and p-value (B) of accession-specific metabolites and metabolic genes.
A.	SMEL_008g312160.1	SMEL_002g161810.1	SMEL_001g115360.1	SMEL_003g186060.1	SMEL_009g321940.1	SMEL_005g228020.1	SMEL_000g033540.1	SMEL_011g377500.1	SMEL_006g261320.1	SMEL_001g123750.1	SMEL_010g337250.1	SMEL_002g167350.1	SMEL_012g398810.1	SMEL_001g123420.1	SMEL_003g195740.1	SMEL_010g360980.1	SMEL_005g230780.1	SMEL_003g183980.1	SMEL_001g116660.1	SMEL_005g242150.1	SMEL_001g150880.1	SMEL_005g228550.1	SMEL_011g362280.1	SMEL_010g360640.1	SMEL_010g351040.1	SMEL_006g267290.1	SMEL_007g282260.1	SMEL_009g333060.1	SMEL_004g219260.1	SMEL_006g262400.1	SMEL_007g277290.1	SMEL_007g277310.1	SMEL_009g330200.1	SMEL_012g382160.1	SMEL_000g085440.1	SMEL_007g279110.1	SMEL_003g198560.1	SMEL_006g259800.1	SMEL_006g265210.1	SMEL_007g292070.1	SMEL_003g180460.1	SMEL_001g129900.1	SMEL_001g139740.1	SMEL_001g123620.1	SMEL_003g177010.1	SMEL_003g180470.1	SMEL_000g109110.1	SMEL_003g196100.1	SMEL_004g216950.1
SMEL_008g312160.1	1	0.00396216	-0.459652	0.0519303	0.190075	0.155685	-0.247334	-0.0917506	0.323959	0.140172	0.0941434	0.260014	0.113468	-0.172218	-0.437315	0.234269	0.376541	0.36181	-0.456713	-0.537628	-0.360772	0.494757	0.546919	-0.0792999	0.278445	-0.0823233	-0.0584858	0.244798	-0.443456	0.355056	-0.223559	0.514464	-0.235574	0.284486	-0.496835	-0.485421	0.195805	0.296605	0.371082	-0.599479	-0.317152	0.0692967	-0.161387	-0.23746	-0.56714	0.418422	0.386376	-0.286516	-0.0631204
SMEL_002g161810.1	0.00396216	1	0.116942	0.0130347	0.0246107	-0.195284	0.220328	0.0723219	-0.0373033	-0.181427	-0.132617	-0.0359346	-0.0484139	-0.101075	0.132556	-0.0137961	-0.149614	-0.0561146	0.162501	0.196077	0.115704	-0.140793	0.153912	-0.0929453	-0.191877	0.245919	-0.0260387	0.0443938	0.0782533	-0.176599	-0.220078	-0.0678502	0.158372	-0.108238	0.0188401	0.17917	-0.266155	0.0212997	-0.159461	0.0603155	-0.0637347	0.00365522	0.232699	-0.2359	-0.273486	-0.0469396	-0.0398413	-0.0727893	-0.274694
SMEL_001g115360.1	-0.459652	0.116942	1	0.0944369	-0.00786491	0.0653394	0.703208	0.299885	-0.546555	-0.339319	-0.10897	-0.0458266	-0.114258	0.112254	0.681446	0.131004	-0.581114	-0.711895	0.843003	0.880408	0.572016	-0.897184	-0.337314	-0.0182355	0.0223801	0.501866	0.042546	-0.507597	0.418762	-0.341137	-0.257152	-0.866435	0.537832	-0.788527	0.681757	0.716459	-0.451651	-0.159999	-0.817751	0.745859	0.605359	-0.172117	0.138892	-0.163816	0.115167	-0.791338	-0.560663	0.140347	-0.159057
SMEL_003g186060.1	0.0519303	0.0130347	0.0944369	1	0.0156706	0.47655	0.0598225	-0.0353952	0.0369744	-0.0906872	-0.00495142	0.0752386	-0.0983191	0.326948	-0.0675488	-0.051341	0.212666	0.0917915	0.132354	0.048248	-0.0678956	-0.0471764	-0.20753	-0.247388	0.100055	0.141689	0.139906	-0.027269	0.0742194	-0.186171	-0.0906549	0.010954	0.1076	-0.0616316	0.08774	0.0559794	-0.136408	-0.0474783	-0.0887205	-0.0764153	-0.0969104	-0.150423	0.323941	0.0115048	-0.14802	-0.00238486	0.115998	-0.0876382	-0.15255
SMEL_009g321940.1	0.190075	0.0246107	-0.00786491	0.0156706	1	0.0641546	-0.192617	-0.276446	0.148087	-0.165027	-0.106151	0.0191179	0.0868774	-0.11843	-0.0725262	0.15751	-0.111574	0.0761014	-0.0179387	-0.0303779	-0.0911108	0.124677	0.0117215	0.122007	0.000970705	-0.0409975	-0.223891	0.125875	-0.0446425	0.0642856	-0.246477	0.0396543	-0.0320104	-0.0537603	-0.119328	-0.133005	0.0344243	0.113471	-0.0326779	-0.131735	-0.141455	-0.104199	0.0577279	-0.0147967	-0.276056	0.127569	0.0791812	-0.157835	-0.244315
SMEL_005g228020.1	0.155685	-0.195284	0.0653394	0.47655	0.0641546	1	0.0824272	-0.0254546	0.0372399	0.188503	0.293351	0.210523	-0.196295	0.299791	-0.151337	-0.0239917	0.0564159	-0.0406526	-0.00402069	0.0545395	-0.0873224	-0.0449586	-0.113894	-0.292136	0.225578	0.197723	0.194907	-0.201023	-0.0496806	-0.0480033	-0.211597	-0.0494097	0.119712	-0.106505	0.048412	0.00309912	-0.0639149	-0.161758	-0.16229	-0.0741098	0.000729489	-0.0787487	0.174228	0.0598015	-0.0780393	0.0459787	0.207856	-0.205651	-0.134209
SMEL_000g033540.1	-0.247334	0.220328	0.703208	0.0598225	-0.192617	0.0824272	1	0.432888	-0.408542	-0.113301	-0.0556034	-0.0180082	0.0813226	0.0786852	0.652123	0.282077	-0.273217	-0.526138	0.56316	0.691421	0.489355	-0.676322	-0.0476491	-0.153372	0.165474	0.475498	0.211138	-0.37945	0.154251	-0.168323	-0.195591	-0.672152	0.278533	-0.64513	0.519516	0.474263	-0.321793	0.0699723	-0.649174	0.592568	0.436408	-0.207987	-0.00960896	-0.344198	-0.00706105	-0.709858	-0.455124	-0.0195669	-0.102368
SMEL_011g377500.1	-0.0917506	0.0723219	0.299885	-0.0353952	-0.276446	-0.0254546	0.432888	1	-0.156193	0.107399	0.215595	0.188703	0.370074	0.245505	0.30571	0.322024	0.0021399	-0.0949056	0.290741	0.234522	0.287312	-0.410951	0.161123	0.0439825	0.288783	0.338476	0.334521	-0.177642	-0.0573213	0.242875	-0.082341	-0.268033	0.0642793	-0.312996	0.258894	0.17753	-0.240731	0.0404994	-0.180093	0.366714	0.0679574	-0.219025	-0.351207	-0.253606	-0.0023327	-0.451094	-0.234635	-0.125545	0.139665
SMEL_006g261320.1	0.323959	-0.0373033	-0.546555	0.0369744	0.148087	0.0372399	-0.408542	-0.156193	1	0.195475	-0.0113027	0.0492378	-0.0114232	-0.0217215	-0.551647	-0.111353	0.371944	0.26133	-0.46978	-0.556888	-0.178325	0.547269	0.302096	0.0293832	0.0658117	-0.272054	0.00630002	0.458335	-0.129374	0.247984	0.113932	0.51327	-0.347651	0.517995	-0.599604	-0.353104	0.2427	0.230057	0.519471	-0.485091	-0.314307	0.093488	0.0596996	-0.0691681	-0.158196	0.468742	0.265825	-0.307559	-0.0390918
SMEL_001g123750.1	0.140172	-0.181427	-0.339319	-0.0906872	-0.165027	0.188503	-0.113301	0.107399	0.195475	1	0.335167	0.159131	0.00370079	0.00344558	-0.194714	0.0508636	0.335852	0.297916	-0.484089	-0.36804	-0.261709	0.256955	0.243876	0.203099	0.210635	0.0380286	0.0263599	-0.0158201	-0.405878	0.16766	-0.0190539	0.266065	-0.0794335	0.319058	-0.170273	-0.340791	0.289834	-0.0684666	0.214498	-0.312569	-0.0481462	-0.174673	-0.337278	0.138248	-0.0993365	0.203966	0.298813	-0.20572	0.147679
SMEL_010g337250.1	0.0941434	-0.132617	-0.10897	-0.00495142	-0.106151	0.293351	-0.0556034	0.215595	-0.0113027	0.335167	1	0.16849	0.0760414	0.0621316	-0.246459	0.116067	0.206726	0.20212	-0.267589	-0.214437	-0.342611	0.0625712	0.153671	0.123447	0.149617	0.131836	0.123047	-0.00547828	-0.364165	0.157671	-0.0705373	0.113995	0.029282	0.147007	-0.10037	-0.259791	0.137241	-0.0329121	0.125521	-0.0754743	-0.0723739	-0.0626602	-0.25808	0.0783282	-0.0160346	0.0801514	0.0449667	-0.107499	0.111392
SMEL_002g167350.1	0.260014	-0.0359346	-0.0458266	0.0752386	0.0191179	0.210523	-0.0180082	0.188703	0.0492378	0.159131	0.16849	1	0.0729021	0.247396	-0.139867	-0.0817192	0.0629301	-0.00877552	-0.151018	-0.120885	-0.00517536	-0.0186344	0.121273	-0.114286	0.247477	0.258837	-0.0990996	0.0186547	-0.142169	-0.0709716	-0.378362	0.0758989	-0.044786	-0.00619275	-0.160481	-0.143136	-0.0847282	-0.0245887	-0.0855209	-0.157758	-0.15527	0.0327311	-0.0583266	-0.113062	-0.347289	0.152566	-0.0254381	-0.110748	-0.244563
SMEL_012g398810.1	0.113468	-0.0484139	-0.114258	-0.0983191	0.0868774	-0.196295	0.0813226	0.370074	-0.0114232	0.00370079	0.0760414	0.0729021	1	0.0699107	0.143681	0.458655	0.307721	0.249384	-0.0768306	-0.113898	0.0234188	0.0382494	0.363359	0.246543	0.312532	0.00683994	0.106605	0.165528	-0.13972	0.467773	0.0795472	0.0775984	-0.109457	0.031672	0.0335935	-0.129074	0.000188194	0.288335	0.105637	0.0607204	-0.0703575	-0.0465215	-0.505158	-0.112696	-0.0702069	-0.133744	-0.0649073	0.0411907	0.188499
SMEL_001g123420.1	-0.172218	-0.101075	0.112254	0.326948	-0.11843	0.299791	0.0786852	0.245505	-0.0217215	0.00344558	0.0621316	0.247396	0.0699107	1	0.121462	-0.11971	0.0444508	-0.0735227	0.0874416	0.164492	0.129133	-0.222275	-0.210695	-0.176763	0.131833	0.263269	0.0581393	-0.143228	0.151299	-0.0803008	-0.0516705	-0.241134	-0.0927347	-0.117391	0.19104	-0.0290135	-0.117752	-0.2896	-0.183093	0.232718	-0.170607	-0.108452	0.0273245	0.133281	0.0903194	-0.133738	0.0540934	0.0566531	-0.144152
SMEL_003g195740.1	-0.437315	0.132556	0.681446	-0.0675488	-0.0725262	-0.151337	0.652123	0.30571	-0.551647	-0.194714	-0.246459	-0.139867	0.143681	0.121462	1	0.264119	-0.338392	-0.516298	0.641686	0.749312	0.458472	-0.756301	-0.266019	-0.0282298	0.117719	0.394816	0.0576616	-0.504779	0.211931	-0.184143	-0.0239244	-0.758564	0.306594	-0.619366	0.691499	0.517067	-0.407153	-0.0280203	-0.6406	0.76553	0.466495	-0.093395	-0.148982	-0.0541315	0.194912	-0.772147	-0.510621	0.305268	0.0363753
SMEL_010g360980.1	0.234269	-0.0137961	0.131004	-0.051341	0.15751	-0.0239917	0.282077	0.322024	-0.111353	0.0508636	0.116067	-0.0817192	0.458655	-0.11971	0.264119	1	0.248621	0.151459	0.167832	0.0887636	0.0615038	-0.172094	0.246087	0.229288	0.382722	0.137168	0.209464	-0.106121	-0.22534	0.385644	-0.192566	-0.117527	0.0773214	-0.24798	0.0638956	0.0264902	0.104763	0.297376	-0.109318	0.140139	-0.013436	-0.196978	-0.519798	-0.232293	-0.126142	-0.381037	-0.0901102	-0.161384	0.385727
SMEL_005g230780.1	0.376541	-0.149614	-0.581114	0.212666	-0.111574	0.0564159	-0.273217	0.0021399	0.371944	0.335852	0.206726	0.0629301	0.307721	0.0444508	-0.338392	0.248621	1	0.518462	-0.470526	-0.571085	-0.306239	0.491523	0.182533	-0.0172599	0.210782	-0.113669	0.0105811	0.306869	-0.265006	0.354658	0.133723	0.446551	-0.452339	0.425782	-0.388297	-0.371137	0.360065	0.197369	0.462231	-0.386726	-0.346699	-0.0179875	-0.349577	0.102488	-0.0895125	0.311649	0.419581	-0.273104	0.246402
SMEL_003g183980.1	0.36181	-0.0561146	-0.711895	0.0917915	0.0761014	-0.0406526	-0.526138	-0.0949056	0.26133	0.297916	0.20212	-0.00877552	0.249384	-0.0735227	-0.516298	0.151459	0.518462	1	-0.614695	-0.661051	-0.556969	0.688736	0.299085	0.230152	-0.065925	-0.240671	0.0374249	0.335123	-0.533785	0.385518	0.214168	0.765467	-0.203521	0.606243	-0.454328	-0.564548	0.336574	0.114413	0.726504	-0.514392	-0.561966	-0.0523497	-0.284125	-0.033496	-0.089365	0.548657	0.482995	-0.03502	0.309457
SMEL_001g116660.1	-0.456713	0.162501	0.843003	0.132354	-0.0179387	-0.00402069	0.56316	0.290741	-0.46978	-0.484089	-0.267589	-0.151018	-0.0768306	0.0874416	0.641686	0.167832	-0.470526	-0.614695	1	0.845769	0.709763	-0.792574	-0.384559	0.00945794	0.0608822	0.351859	0.0648094	-0.364609	0.539772	-0.275822	-0.265654	-0.769464	0.41686	-0.785473	0.597226	0.709063	-0.466814	-0.0986246	-0.725201	0.710383	0.511051	-0.0831579	0.193624	-0.121683	0.146967	-0.711347	-0.555365	0.167508	-0.0436944
SMEL_005g242150.1	-0.537628	0.196077	0.880408	0.048248	-0.0303779	0.0545395	0.691421	0.234522	-0.556888	-0.36804	-0.214437	-0.120885	-0.113898	0.164492	0.749312	0.0887636	-0.571085	-0.661051	0.845769	1	0.582707	-0.911048	-0.403974	-0.0735883	-0.0859065	0.482552	-0.00664592	-0.569308	0.451757	-0.316216	-0.303814	-0.883089	0.48061	-0.823109	0.761739	0.690199	-0.442539	-0.177138	-0.850735	0.787524	0.498817	-0.0797443	0.197513	-0.155295	0.137576	-0.77694	-0.583878	0.200293	-0.133721
SMEL_001g150880.1	-0.360772	0.115704	0.572016	-0.0678956	-0.0911108	-0.0873224	0.489355	0.287312	-0.178325	-0.261709	-0.342611	-0.00517536	0.0234188	0.129133	0.458472	0.0615038	-0.306239	-0.556969	0.709763	0.582707	1	-0.534781	-0.258297	0.0123603	0.155086	0.284213	0.020626	-0.1067	0.554757	-0.136466	-0.0698031	-0.583851	0.160001	-0.532259	0.414574	0.527091	-0.268648	-0.0189423	-0.51788	0.553982	0.493072	0.0106337	0.0408682	-0.0240499	0.223631	-0.53779	-0.445472	0.14492	-0.0156669
SMEL_005g228550.1	0.494757	-0.140793	-0.897184	-0.0471764	0.124677	-0.0449586	-0.676322	-0.410951	0.547269	0.256955	0.0625712	-0.0186344	0.0382494	-0.222275	-0.756301	-0.172094	0.491523	0.688736	-0.792574	-0.911048	-0.534781	1	0.326609	0.0390543	0.00551656	-0.578268	-0.00978537	0.614855	-0.41102	0.325456	0.295611	0.886703	-0.443095	0.806189	-0.76832	-0.689396	0.479743	0.148444	0.839088	-0.801302	-0.51332	0.100938	-0.0692865	0.124176	-0.132334	0.799087	0.61295	-0.17743	0.109098
SMEL_011g362280.1	0.546919	0.153912	-0.337314	-0.20753	0.0117215	-0.113894	-0.0476491	0.161123	0.302096	0.243876	0.153671	0.121273	0.363359	-0.210695	-0.266019	0.246087	0.182533	0.299085	-0.384559	-0.403974	-0.258297	0.326609	1	0.137848	0.243586	-0.101727	0.0393089	0.259722	-0.367235	0.237487	-0.0922227	0.354386	-0.157739	0.288299	-0.406195	-0.403665	0.0617067	0.457802	0.299933	-0.261165	-0.32198	0.0263526	-0.332727	-0.331452	-0.52589	0.127063	0.229484	-0.281621	-0.0821234
SMEL_010g360640.1	-0.0792999	-0.0929453	-0.0182355	-0.247388	0.122007	-0.292136	-0.153372	0.0439825	0.0293832	0.203099	0.123447	-0.114286	0.246543	-0.176763	-0.0282298	0.229288	-0.0172599	0.230152	0.00945794	-0.0735883	0.0123603	0.0390543	0.137848	1	0.113687	0.0397524	-0.125323	0.0406448	-0.0926011	0.324152	-0.00915032	0.0185267	0.16438	0.0317862	0.00718099	-0.0592636	0.0550141	0.0391789	0.077907	0.0215868	0.187134	-0.0385809	-0.374917	-0.00702586	0.0489288	0.0146253	-0.151721	0.11433	0.11637
SMEL_010g351040.1	0.278445	-0.191877	0.0223801	0.100055	0.000970705	0.225578	0.165474	0.288783	0.0658117	0.210635	0.149617	0.247477	0.312532	0.131833	0.117719	0.382722	0.210782	-0.065925	0.0608822	-0.0859065	0.155086	0.00551656	0.243586	0.113687	1	0.100288	0.181438	0.0451338	-0.252752	0.259312	-0.0857968	-0.107661	-0.129066	-0.136336	-0.112555	-0.208429	0.121106	0.208639	-0.111888	-0.056614	0.157869	-0.187702	-0.461415	-0.0411448	-0.185983	-0.140736	-0.023792	-0.102118	0.198755
SMEL_006g267290.1	-0.0823233	0.245919	0.501866	0.141689	-0.0409975	0.197723	0.475498	0.338476	-0.272054	0.0380286	0.131836	0.258837	0.00683994	0.263269	0.394816	0.137168	-0.113669	-0.240671	0.351859	0.482552	0.284213	-0.578268	-0.101727	0.0397524	0.100288	1	-0.0816058	-0.530883	0.014876	-0.119401	-0.244253	-0.50508	0.301793	-0.496364	0.545349	0.331218	-0.157111	-0.120356	-0.501666	0.456623	0.300619	-0.0917276	-0.0888972	-0.147101	-0.0818857	-0.369725	-0.382142	0.0891144	-0.113456
SMEL_007g282260.1	-0.0584858	-0.0260387	0.042546	0.139906	-0.223891	0.194907	0.211138	0.334521	0.00630002	0.0263599	0.123047	-0.0990996	0.106605	0.0581393	0.0576616	0.209464	0.0105811	0.0374249	0.0648094	-0.00664592	0.020626	-0.00978537	0.0393089	-0.125323	0.181438	-0.0816058	1	-0.0161721	-0.0890514	0.102149	0.242238	-0.0133674	0.141411	0.00135891	0.00733755	0.0261174	0.0178149	0.00856057	0.128731	0.0448596	0.00834436	-0.213967	-0.106259	-0.0936514	0.125368	-0.232628	0.0767082	0.0252471	0.255469
SMEL_009g333060.1	0.244798	0.0443938	-0.507597	-0.027269	0.125875	-0.201023	-0.37945	-0.177642	0.458335	-0.0158201	-0.00547828	0.0186547	0.165528	-0.143228	-0.504779	-0.106121	0.306869	0.335123	-0.364609	-0.569308	-0.1067	0.614855	0.259722	0.0406448	0.0451338	-0.530883	-0.0161721	1	-0.0418417	0.0721537	0.131963	0.520087	-0.335597	0.551503	-0.607531	-0.249283	0.212972	0.141571	0.511977	-0.50934	-0.381462	0.0130451	0.0561917	-0.0344511	-0.200715	0.391527	0.365066	-0.159829	-0.00894254
SMEL_004g219260.1	-0.443456	0.0782533	0.418762	0.0742194	-0.0446425	-0.0496806	0.154251	-0.0573213	-0.129374	-0.405878	-0.364165	-0.142169	-0.13972	0.151299	0.211931	-0.22534	-0.265006	-0.533785	0.539772	0.451757	0.554757	-0.41102	-0.367235	-0.0926011	-0.252752	0.014876	-0.0890514	-0.0418417	1	-0.306206	-0.0545972	-0.4425	0.0518306	-0.326524	0.276891	0.488321	-0.341795	-0.238627	-0.396462	0.370052	0.291322	0.108103	0.344042	0.325654	0.293691	-0.236465	-0.314151	0.109843	-0.231793
SMEL_006g262400.1	0.355056	-0.176599	-0.341137	-0.186171	0.0642856	-0.0480033	-0.168323	0.242875	0.247984	0.16766	0.157671	-0.0709716	0.467773	-0.0803008	-0.184143	0.385644	0.354658	0.385518	-0.275822	-0.316216	-0.136466	0.325456	0.237487	0.324152	0.259312	-0.119401	0.102149	0.0721537	-0.306206	1	0.195414	0.308443	-0.204226	0.219235	-0.143046	-0.384578	0.234898	0.18196	0.388948	-0.252271	-0.0539289	0.0373638	-0.571049	-0.0449513	0.0783306	0.120458	0.198842	-0.0863104	0.340428
SMEL_007g277290.1	-0.223559	-0.220078	-0.257152	-0.0906549	-0.246477	-0.211597	-0.195591	-0.082341	0.113932	-0.0190539	-0.0705373	-0.378362	0.0795472	-0.0516705	-0.0239244	-0.192566	0.133723	0.214168	-0.265654	-0.303814	-0.0698031	0.295611	-0.0922227	-0.00915032	-0.0857968	-0.244253	0.242238	0.131963	-0.0545972	0.195414	1	0.262204	-0.200594	0.484366	0.0367157	-0.144696	0.173745	0.0597971	0.545682	0.0268935	0.139537	-0.0187677	-0.274217	0.307272	0.661337	0.0812366	0.048881	0.283864	0.413862
SMEL_007g277310.1	0.514464	-0.0678502	-0.866435	0.010954	0.0396543	-0.0494097	-0.672152	-0.268033	0.51327	0.266065	0.113995	0.0758989	0.0775984	-0.241134	-0.758564	-0.117527	0.446551	0.765467	-0.769464	-0.883089	-0.583851	0.886703	0.354386	0.0185267	-0.107661	-0.50508	-0.0133674	0.520087	-0.4425	0.308443	0.262204	1	-0.317847	0.804093	-0.697334	-0.605595	0.410805	0.187454	0.882705	-0.800113	-0.574241	0.0696062	-0.0438462	-0.0183436	-0.159968	0.773261	0.527671	-0.136258	0.17735
SMEL_009g330200.1	-0.235574	0.158372	0.537832	0.1076	-0.0320104	0.119712	0.278533	0.0642793	-0.347651	-0.0794335	0.029282	-0.044786	-0.109457	-0.0927347	0.306594	0.0773214	-0.452339	-0.203521	0.41686	0.48061	0.160001	-0.443095	-0.157739	0.16438	-0.129066	0.301793	0.141411	-0.335597	0.0518306	-0.204226	-0.200594	-0.317847	1	-0.306511	0.421736	0.369262	-0.258779	-0.245276	-0.387209	0.287205	0.349228	-0.184014	0.155555	-0.240709	-0.102034	-0.439964	-0.325	0.213666	-0.111824
SMEL_012g382160.1	0.284486	-0.108238	-0.788527	-0.0616316	-0.0537603	-0.106505	-0.64513	-0.312996	0.517995	0.319058	0.147007	-0.00619275	0.031672	-0.117391	-0.619366	-0.24798	0.425782	0.606243	-0.785473	-0.823109	-0.532259	0.806189	0.288299	0.0317862	-0.136336	-0.496364	0.00135891	0.551503	-0.326524	0.219235	0.484366	0.804093	-0.306511	1	-0.58619	-0.560666	0.410315	0.0422464	0.837491	-0.612465	-0.434933	-0.0310874	-0.138159	0.192956	-0.00284686	0.62443	0.490969	-0.0621136	0.0615508
SMEL_000g085440.1	-0.496835	0.0188401	0.681757	0.08774	-0.119328	0.048412	0.519516	0.258894	-0.599604	-0.170273	-0.10037	-0.160481	0.0335935	0.19104	0.691499	0.0638956	-0.388297	-0.454328	0.597226	0.761739	0.414574	-0.76832	-0.406195	0.00718099	-0.112555	0.545349	0.00733755	-0.607531	0.276891	-0.143046	0.0367157	-0.697334	0.421736	-0.58619	1	0.587018	-0.354812	-0.230852	-0.628016	0.698644	0.579991	-0.077201	-0.0272138	0.0667712	0.36123	-0.635421	-0.502458	0.35308	0.0216855
SMEL_007g279110.1	-0.485421	0.17917	0.716459	0.0559794	-0.133005	0.00309912	0.474263	0.17753	-0.353104	-0.340791	-0.259791	-0.143136	-0.129074	-0.0290135	0.517067	0.0264902	-0.371137	-0.564548	0.709063	0.690199	0.527091	-0.689396	-0.403665	-0.0592636	-0.208429	0.331218	0.0261174	-0.249283	0.488321	-0.384578	-0.144696	-0.605595	0.369262	-0.560666	0.587018	1	-0.34423	-0.192008	-0.607784	0.588307	0.375899	-0.156616	0.272323	-0.159037	0.199175	-0.617994	-0.41263	0.168818	-0.10507
SMEL_003g198560.1	0.195805	-0.266155	-0.451651	-0.136408	0.0344243	-0.0639149	-0.321793	-0.240731	0.2427	0.289834	0.137241	-0.0847282	0.000188194	-0.117752	-0.407153	0.104763	0.360065	0.336574	-0.466814	-0.442539	-0.268648	0.479743	0.0617067	0.0550141	0.121106	-0.157111	0.0178149	0.212972	-0.341795	0.234898	0.173745	0.410805	-0.258779	0.410315	-0.354812	-0.34423	1	0.0372347	0.406904	-0.405056	-0.299839	-0.099172	-0.227768	0.0631047	0.0064393	0.259075	0.341744	-0.153552	0.293558
SMEL_006g259800.1	0.296605	0.0212997	-0.159999	-0.0474783	0.113471	-0.161758	0.0699723	0.0404994	0.230057	-0.0684666	-0.0329121	-0.0245887	0.288335	-0.2896	-0.0280203	0.297376	0.197369	0.114413	-0.0986246	-0.177138	-0.0189423	0.148444	0.457802	0.0391789	0.208639	-0.120356	0.00856057	0.141571	-0.238627	0.18196	0.0597971	0.187454	-0.245276	0.0422464	-0.230852	-0.192008	0.0372347	1	0.224794	-0.116411	-0.0519111	0.0551909	-0.115024	-0.265928	-0.227424	-0.022341	-0.0202498	-0.0376985	0.137174
SMEL_006g265210.1	0.371082	-0.159461	-0.817751	-0.0887205	-0.0326779	-0.16229	-0.649174	-0.180093	0.519471	0.214498	0.125521	-0.0855209	0.105637	-0.183093	-0.6406	-0.109318	0.462231	0.726504	-0.725201	-0.850735	-0.51788	0.839088	0.299933	0.077907	-0.111888	-0.501666	0.128731	0.511977	-0.396462	0.388948	0.545682	0.882705	-0.387209	0.837491	-0.628016	-0.607784	0.406904	0.224794	1	-0.642899	-0.475405	0.0191923	-0.186357	0.0337381	0.0616249	0.644933	0.440553	-0.0239466	0.278575
SMEL_007g292070.1	-0.599479	0.0603155	0.745859	-0.0764153	-0.131735	-0.0741098	0.592568	0.366714	-0.485091	-0.312569	-0.0754743	-0.157758	0.0607204	0.232718	0.76553	0.140139	-0.386726	-0.514392	0.710383	0.787524	0.553982	-0.801302	-0.261165	0.0215868	-0.056614	0.456623	0.0448596	-0.50934	0.370052	-0.252271	0.0268935	-0.800113	0.287205	-0.612465	0.698644	0.588307	-0.405056	-0.116411	-0.642899	1	0.469714	-0.00168513	-0.0751643	0.0185463	0.361145	-0.747359	-0.516701	0.217845	0.00522042
SMEL_003g180460.1	-0.317152	-0.0637347	0.605359	-0.0969104	-0.141455	0.000729489	0.436408	0.0679574	-0.314307	-0.0481462	-0.0723739	-0.15527	-0.0703575	-0.170607	0.466495	-0.013436	-0.346699	-0.561966	0.511051	0.498817	0.493072	-0.51332	-0.32198	0.187134	0.157869	0.300619	0.00834436	-0.381462	0.291322	-0.0539289	0.139537	-0.574241	0.349228	-0.434933	0.579991	0.375899	-0.299839	-0.0519111	-0.475405	0.469714	1	0.10179	-0.0772088	0.202091	0.402473	-0.40436	-0.499932	0.258827	0.100396
SMEL_001g129900.1	0.0692967	0.00365522	-0.172117	-0.150423	-0.104199	-0.0787487	-0.207987	-0.219025	0.093488	-0.174673	-0.0626602	0.0327311	-0.0465215	-0.108452	-0.093395	-0.196978	-0.0179875	-0.0523497	-0.0831579	-0.0797443	0.0106337	0.100938	0.0263526	-0.0385809	-0.187702	-0.0917276	-0.213967	0.0130451	0.108103	0.0373638	-0.0187677	0.0696062	-0.184014	-0.0310874	-0.077201	-0.156616	-0.099172	0.0551909	0.0191923	-0.00168513	0.10179	1	0.218227	0.1761	0.13823	0.306962	0.0772025	0.106692	0.0415608
SMEL_001g139740.1	-0.161387	0.232699	0.138892	0.323941	0.0577279	0.174228	-0.00960896	-0.351207	0.0596996	-0.337278	-0.25808	-0.0583266	-0.505158	0.0273245	-0.148982	-0.519798	-0.349577	-0.284125	0.193624	0.197513	0.0408682	-0.0692865	-0.332727	-0.374917	-0.461415	-0.0888972	-0.106259	0.0561917	0.344042	-0.571049	-0.274217	-0.0438462	0.155555	-0.138159	-0.0272138	0.272323	-0.227768	-0.115024	-0.186357	-0.0751643	-0.0772088	0.218227	1	-0.0712253	-0.131897	0.183024	-0.0530454	-0.010441	-0.474644
SMEL_001g123620.1	-0.23746	-0.2359	-0.163816	0.0115048	-0.0147967	0.0598015	-0.344198	-0.253606	-0.0691681	0.138248	0.0783282	-0.113062	-0.112696	0.133281	-0.0541315	-0.232293	0.102488	-0.033496	-0.121683	-0.155295	-0.0240499	0.124176	-0.331452	-0.00702586	-0.0411448	-0.147101	-0.0936514	-0.0344511	0.325654	-0.0449513	0.307272	-0.0183436	-0.240709	0.192956	0.0667712	-0.159037	0.0631047	-0.265928	0.0337381	0.0185463	0.202091	0.1761	-0.0712253	1	0.473843	0.242967	0.0753518	0.0438985	0.108932
SMEL_003g177010.1	-0.56714	-0.273486	0.115167	-0.14802	-0.276056	-0.0780393	-0.00706105	-0.0023327	-0.158196	-0.0993365	-0.0160346	-0.347289	-0.0702069	0.0903194	0.194912	-0.126142	-0.0895125	-0.089365	0.146967	0.137576	0.223631	-0.132334	-0.52589	0.0489288	-0.185983	-0.0818857	0.125368	-0.200715	0.293691	0.0783306	0.661337	-0.159968	-0.102034	-0.00284686	0.36123	0.199175	0.0064393	-0.227424	0.0616249	0.361145	0.402473	0.13823	-0.131897	0.473843	1	-0.101876	-0.194462	0.353486	0.44613
SMEL_003g180470.1	0.418422	-0.0469396	-0.791338	-0.00238486	0.127569	0.0459787	-0.709858	-0.451094	0.468742	0.203966	0.0801514	0.152566	-0.133744	-0.133738	-0.772147	-0.381037	0.311649	0.548657	-0.711347	-0.77694	-0.53779	0.799087	0.127063	0.0146253	-0.140736	-0.369725	-0.232628	0.391527	-0.236465	0.120458	0.0812366	0.773261	-0.439964	0.62443	-0.635421	-0.617994	0.259075	-0.022341	0.644933	-0.747359	-0.40436	0.306962	0.183024	0.242967	-0.101876	1	0.457061	-0.0961109	-0.101435
SMEL_000g109110.1	0.386376	-0.0398413	-0.560663	0.115998	0.0791812	0.207856	-0.455124	-0.234635	0.265825	0.298813	0.0449667	-0.0254381	-0.0649073	0.0540934	-0.510621	-0.0901102	0.419581	0.482995	-0.555365	-0.583878	-0.445472	0.61295	0.229484	-0.151721	-0.023792	-0.382142	0.0767082	0.365066	-0.314151	0.198842	0.048881	0.527671	-0.325	0.490969	-0.502458	-0.41263	0.341744	-0.0202498	0.440553	-0.516701	-0.499932	0.0772025	-0.0530454	0.0753518	-0.194462	0.457061	1	-0.284032	0.071643
SMEL_003g196100.1	-0.286516	-0.0727893	0.140347	-0.0876382	-0.157835	-0.205651	-0.0195669	-0.125545	-0.307559	-0.20572	-0.107499	-0.110748	0.0411907	0.0566531	0.305268	-0.161384	-0.273104	-0.03502	0.167508	0.200293	0.14492	-0.17743	-0.281621	0.11433	-0.102118	0.0891144	0.0252471	-0.159829	0.109843	-0.0863104	0.283864	-0.136258	0.213666	-0.0621136	0.35308	0.168818	-0.153552	-0.0376985	-0.0239466	0.217845	0.258827	0.106692	-0.010441	0.0438985	0.353486	-0.0961109	-0.284032	1	0.170978
SMEL_004g216950.1	-0.0631204	-0.274694	-0.159057	-0.15255	-0.244315	-0.134209	-0.102368	0.139665	-0.0390918	0.147679	0.111392	-0.244563	0.188499	-0.144152	0.0363753	0.385727	0.246402	0.309457	-0.0436944	-0.133721	-0.0156669	0.109098	-0.0821234	0.11637	0.198755	-0.113456	0.255469	-0.00894254	-0.231793	0.340428	0.413862	0.17735	-0.111824	0.0615508	0.0216855	-0.10507	0.293558	0.137174	0.278575	0.00522042	0.100396	0.0415608	-0.474644	0.108932	0.44613	-0.101435	0.071643	0.170978	1
SMEL_010g341280.1	-0.0687847	-0.128036	0.0999568	0.196128	-0.0249614	0.116083	0.0825137	0.158444	-0.0545169	-0.0454453	0.199153	0.0399396	0.108938	0.223483	0.000333461	0.331299	0.0509539	0.0907844	0.0545709	-0.00760906	-0.075549	-0.0346657	0.0191528	0.0273579	0.160767	0.0149496	0.318651	0.0805009	-0.143328	-0.0693958	-0.0286657	0.0109731	0.0528622	-0.088834	-0.0593085	0.00560867	0.195794	0.0180547	0.0748035	0.0572056	-0.226961	-0.181818	-0.050305	-0.251086	0.045191	-0.156493	0.0437512	0.00681789	0.166858
SMEL_006g268370.1	0.380534	-0.145987	-0.655063	0.0407664	0.192152	0.164121	-0.527231	-0.241463	0.415947	0.315127	0.231082	0.160379	-0.03823	-0.0650608	-0.621853	-0.14534	0.258178	0.567321	-0.654125	-0.683795	-0.610805	0.70397	0.245337	0.0954554	0.0768425	-0.368998	0.127183	0.358962	-0.437398	0.20095	0.0419854	0.672809	-0.156681	0.614628	-0.619104	-0.638218	0.36059	-0.0193839	0.582322	-0.708931	-0.477991	0.0207474	-0.0171498	0.00295208	-0.257118	0.662128	0.470728	-0.142675	-0.0508975
SMEL_012g395700.1	-0.229481	-0.113391	0.356891	-0.238219	-0.230088	-0.147496	0.292732	0.346099	-0.408791	0.117953	0.0956097	0.0889672	0.145694	0.0385819	0.42749	0.150681	-0.115656	-0.308469	0.223118	0.299975	0.257512	-0.411179	-0.00251	0.112151	0.273801	0.329105	-0.0599908	-0.252817	0.0446842	-0.000192985	-0.0282912	-0.471813	0.025339	-0.353278	0.455057	0.194772	-0.0539905	-0.177553	-0.409612	0.410213	0.349616	0.0289532	-0.407096	0.19479	0.17447	-0.370059	-0.264098	0.0642705	0.115067
SMEL_003g195970.1	-0.334393	-0.0229577	0.593735	-0.110267	-0.165627	0.0137557	0.562749	0.445895	-0.428234	0.024004	0.113835	0.0155711	0.30734	0.125534	0.629566	0.319501	-0.231755	-0.381472	0.394754	0.513167	0.339382	-0.621727	0.0206778	0.0533942	0.192404	0.368097	0.170102	-0.2485	0.0895159	-0.104593	-0.0370799	-0.626846	0.236879	-0.478424	0.526561	0.436587	-0.335245	-0.0711679	-0.539319	0.661202	0.398233	-0.12228	-0.317297	-0.0490583	0.117597	-0.660027	-0.321374	0.0872755	0.0350979
SMEL_000g036450.1	-0.648109	-0.0632745	0.663978	-0.103891	-0.183997	-0.0766001	0.443937	0.143661	-0.348286	-0.326498	-0.261571	-0.196816	-0.213596	0.104386	0.561529	-0.0779569	-0.4139	-0.570645	0.650764	0.704161	0.597543	-0.641644	-0.584018	-0.0118095	-0.184638	0.232622	0.0347187	-0.44814	0.499502	-0.198974	0.205549	-0.623091	0.241179	-0.497638	0.612214	0.58499	-0.246266	-0.170896	-0.466878	0.705308	0.602864	0.0139514	0.0766958	0.0652534	0.63029	-0.575158	-0.489389	0.31281	0.18063
SMEL_000g017060.1	-0.0980598	0.128777	-0.154002	-0.0411702	-0.224661	-0.105096	-0.0915418	-0.0958903	0.115453	0.0683529	0.0172793	0.11949	-0.0157306	0.0983672	-0.0632952	-0.276104	0.0190963	-0.0557774	-0.198433	-0.146629	-0.0126216	0.0927039	0.178513	-0.16225	-0.215157	-0.148961	0.0161546	0.148975	0.147506	-0.278527	0.114836	0.14316	-0.194922	0.281042	-0.0928481	0.022533	0.00266134	0.0369188	0.128158	-0.0560197	-0.212747	0.106387	0.0878623	0.157804	-0.00380229	0.128966	0.0754274	0.0637867	-0.194656
SMEL_000g078070.1	0.498528	0.107453	-0.10521	0.0270847	0.112755	0.159177	0.0561172	-0.057518	0.0707047	0.0752866	0.114514	0.268655	-0.0451875	-0.158336	-0.186647	-0.0956141	-0.0140711	-0.0837422	-0.187503	-0.142784	-0.16338	0.0789899	0.300309	-0.172876	-0.0186671	0.0459777	-0.116318	-0.0580614	-0.112921	-0.0618505	-0.386953	0.0875244	-0.116611	-0.0899797	-0.264309	-0.239157	-0.218823	0.201554	-0.060565	-0.241274	-0.0459313	0.213137	0.222491	-0.0271596	-0.46944	0.269924	0.0461008	-0.161813	-0.407345
SMEL_001g151160.1	0.617378	0.0321629	-0.751959	-0.058206	0.178982	0.0410476	-0.47129	-0.249383	0.446917	0.296167	0.159484	0.237613	0.204479	-0.200617	-0.599581	-0.00858022	0.397338	0.56695	-0.74051	-0.73835	-0.655613	0.722399	0.457731	-0.0192873	0.0957597	-0.308472	-0.163291	0.411212	-0.610194	0.234881	-0.113292	0.737706	-0.324738	0.530854	-0.692204	-0.621258	0.319787	0.261835	0.557026	-0.735709	-0.522448	0.112319	-0.0272195	-0.153722	-0.467791	0.695591	0.438796	-0.270625	-0.0356098
SMEL_007g294680.1	-0.18928	0.0661934	0.265302	-2.82774e-06	0.0355264	0.0127696	0.211276	0.219214	-0.200653	0.0515861	-0.0810729	0.328473	-0.0632004	0.162054	0.336639	-0.0389638	-0.221278	-0.153795	0.186361	0.23791	0.239311	-0.254491	-0.0488954	-0.0428181	0.17067	0.20408	0.126174	-0.106127	-0.0778947	-0.234117	-0.0536998	-0.213809	0.169826	-0.153591	0.216772	0.158269	-0.0778532	0.0210114	-0.188995	0.212087	0.0803884	-0.153705	-0.0149045	-0.210209	-0.0386074	-0.220014	-0.168496	0.17524	-0.133323
SMEL_000g085330.1	-0.288222	-0.0516841	0.57377	-0.0157492	-0.223654	0.0758321	0.484135	0.310914	-0.416851	-0.127744	-0.0429622	0.0405235	-0.0483429	0.167854	0.6121	0.0903446	-0.320978	-0.635372	0.510591	0.526921	0.435397	-0.608732	-0.197606	0.00980328	0.200857	0.446063	0.120831	-0.456624	0.242834	-0.153529	-0.00386751	-0.638116	0.306486	-0.520167	0.612318	0.469547	-0.3282	-0.0422123	-0.530842	0.512387	0.492475	0.0306916	-0.0682184	0.0214225	0.169232	-0.553148	-0.497047	0.281948	-0.0815047
SMEL_001g152910.1	-0.288128	0.103875	0.672516	0.0273335	-0.0137901	0.180874	0.514365	0.251126	-0.471081	-0.136957	0.023991	0.0186051	0.0644996	0.0702648	0.604404	0.313371	-0.240279	-0.492431	0.640502	0.641296	0.526375	-0.692843	-0.211967	0.0434734	0.16965	0.389484	-0.0196426	-0.447416	0.303223	-0.149603	-0.256354	-0.690701	0.370552	-0.628331	0.526907	0.494099	-0.477282	-0.136542	-0.68948	0.60796	0.488705	-0.0483056	-0.111026	0.065247	0.0968463	-0.593225	-0.416967	0.0668628	-0.0547794
SMEL_000g089310.1	-0.10321	-0.0312186	0.283315	0.133111	-0.0271227	0.107748	0.330146	0.339927	-0.00625258	0.0497691	0.19642	0.144492	0.0896534	0.155261	0.247614	0.259639	-0.133111	-0.236674	0.187696	0.214415	0.175885	-0.282561	0.0800191	0.0267372	0.400752	0.149517	0.265244	-0.197995	-0.110892	0.147771	-0.0108333	-0.315712	-0.12804	-0.297339	0.14183	0.0174644	-0.125998	0.160463	-0.219402	0.239358	0.0897001	-0.156671	-0.221642	-0.100935	0.0889973	-0.356124	-0.185927	-0.123515	0.122351
SMEL_008g312130.1	0.341779	0.150841	-0.150999	-0.020527	0.181787	0.00948423	-0.0840231	-0.0318681	0.0957246	0.0630902	-0.0681074	0.273897	0.0268936	-0.0779285	-0.251585	-0.109972	-0.0471814	0.120316	-0.190243	-0.168574	-0.180977	0.197181	0.379657	-0.02513	0.037375	0.0302349	-0.253115	0.0623068	-0.356222	0.0554181	-0.361138	0.21693	-0.169121	-0.00991663	-0.293371	-0.157788	0.0725282	0.215873	0.0366914	-0.233907	-0.285837	0.0982073	0.0822734	-0.392635	-0.560684	0.210906	0.343314	-0.214914	-0.209556
SMEL_000g067190.1	-0.219241	0.126143	0.159611	-0.0685123	-0.33693	-0.0478979	0.202949	0.216609	-0.0854956	-0.0853989	0.0529892	-0.0161032	-0.0954711	0.0515042	0.218946	-0.257853	-0.0837815	-0.165381	0.0758105	0.233962	-0.00221365	-0.296492	-0.0124169	-0.187895	-0.349608	0.261641	-0.040095	-0.323536	0.225198	-0.156774	0.118449	-0.207374	0.0525582	-0.0774236	0.272179	0.192113	-0.241425	-0.00668005	-0.0997769	0.37417	0.0982445	0.272887	0.163556	0.0309517	0.165272	-0.137341	-0.237593	0.092631	-0.175642
SMEL_003g189340.1	0.304135	-0.064848	-0.167941	-0.0952573	-0.00337702	-0.102174	0.108092	0.419245	0.241301	0.212132	0.150595	0.0879075	0.496202	-0.0255818	0.0602861	0.596564	0.34879	0.212612	-0.119237	-0.275026	0.0634971	0.156008	0.454358	0.216995	0.546672	0.0349612	0.327915	0.262377	-0.299326	0.47586	0.194661	0.1547	-0.154053	0.168901	-0.214702	-0.190603	0.121284	0.437574	0.285023	-0.0492916	-0.0729075	-0.306208	-0.592401	-0.207001	-0.137213	-0.186243	-0.0380831	-0.112419	0.344991
SMEL_003g196890.1	-0.598802	0.0709975	0.455173	0.165493	-0.132399	0.123345	0.186342	0.145055	-0.333086	-0.271021	-0.0633441	-0.327521	-0.120235	0.293084	0.436085	-0.083022	-0.332199	-0.329934	0.469872	0.529711	0.232192	-0.505902	-0.356177	0.0205008	-0.146102	0.17584	0.201535	-0.263268	0.473505	-0.182018	0.214792	-0.522745	0.240345	-0.296081	0.54639	0.422584	-0.244375	-0.293574	-0.351232	0.580181	0.29508	0.00965786	0.0971524	0.255626	0.455069	-0.417161	-0.22658	0.231177	-0.0133699
SMEL_001g151200.1	-0.00812038	-0.0291789	0.374756	0.0946341	-0.0526462	0.0597068	0.487681	0.43182	-0.320104	0.206156	0.104865	0.151553	0.367165	0.153344	0.523132	0.615976	0.143813	-0.114565	0.32232	0.300332	0.279121	-0.40828	0.0602401	0.108911	0.623832	0.42661	0.149125	-0.241826	-0.142563	0.156057	-0.135004	-0.420242	0.157067	-0.375597	0.362845	0.183147	-0.0274204	0.0824728	-0.372103	0.336825	0.262706	-0.418692	-0.517235	-0.117786	-0.0935059	-0.555997	-0.260306	0.00787898	0.233154
SMEL_003g178610.1	-0.329297	0.148148	0.186131	0.113723	0.108222	0.204534	0.087216	-0.108318	-0.104967	-0.0913284	-0.00584984	0.0931459	-0.140427	0.266593	0.10999	-0.117586	-0.100952	-0.230222	0.223954	0.329281	0.21636	-0.250949	-0.275864	-0.120401	-0.155079	0.105963	-0.186226	-0.0486436	0.327729	-0.424417	-0.356741	-0.298494	0.0622136	-0.18275	0.162583	0.315291	-0.0958837	-0.350679	-0.426036	0.312847	-0.0256151	-0.0626633	0.270933	0.131359	-0.00930253	-0.0759521	-0.0473066	-0.099878	-0.309324
SMEL_008g307820.1	-0.627771	0.0751318	0.881021	-0.0226132	-0.158843	-0.076518	0.672342	0.278988	-0.518048	-0.36955	-0.226831	-0.204197	-0.101992	0.0884428	0.760508	0.0843002	-0.514072	-0.7222	0.876924	0.910363	0.685555	-0.871314	-0.404852	-0.0447988	-0.0393021	0.355076	0.0809222	-0.440529	0.530363	-0.343804	-0.100713	-0.877461	0.418427	-0.750539	0.724245	0.747373	-0.421733	-0.161861	-0.7694	0.816101	0.601509	-0.0500221	0.100623	-0.0619243	0.310474	-0.822023	-0.59827	0.243073	0.0027692
SMEL_001g124710.1	-0.129761	-0.0404444	0.110059	-0.119875	-0.13074	-0.256741	0.0213095	0.16831	-0.207322	0.1582	0.174217	0.0417257	0.248695	0.0654858	0.17565	0.130687	0.0619467	-0.0159564	0.0709638	0.0565483	-0.00985159	-0.184147	0.0774823	0.274844	0.116106	0.172052	-0.0665781	-0.0455779	0.0534875	-0.016979	-0.0369693	-0.178467	0.0428791	-0.0207971	0.198032	0.022788	0.0811456	-0.0993361	-0.198939	0.181896	0.131287	-0.109065	-0.283399	0.315637	-0.0186869	-0.192138	-0.126408	-0.0476886	0.127486
SMEL_005g227630.1	-0.533086	0.12199	0.790878	-0.00666451	-0.101924	-0.0735883	0.698831	0.376881	-0.566644	-0.260039	-0.161569	-0.172272	0.0594985	0.0942479	0.843281	0.2724	-0.356087	-0.550832	0.761359	0.848537	0.599021	-0.839966	-0.342119	-0.0300519	0.0332232	0.465811	0.0669509	-0.499591	0.339306	-0.20755	-0.0555789	-0.823478	0.381457	-0.723313	0.766425	0.664681	-0.361871	-0.126605	-0.722813	0.795171	0.498414	-0.128517	-0.111043	-0.0638519	0.299567	-0.856375	-0.536817	0.199215	0.11542
SMEL_005g239330.1	0.0596054	-0.11193	-0.60344	-0.0555414	-0.0560373	-0.27729	-0.55894	-0.220001	0.333172	0.285753	0.0638707	-0.143603	-0.00124266	-0.0949454	-0.426938	-0.156598	0.393585	0.573172	-0.581443	-0.621937	-0.375356	0.635139	0.0312744	0.182472	-0.118719	-0.320195	-0.00579826	0.253251	-0.374676	0.320582	0.557984	0.618485	-0.219769	0.656721	-0.388263	-0.544291	0.451478	0.099311	0.732635	-0.392511	-0.226956	0.127776	-0.191267	0.194667	0.260787	0.500219	0.394878	0.0852893	0.328695
SMEL_000g004730.1	-0.581569	0.115579	0.89754	-0.0228914	-0.108629	-0.0325448	0.693901	0.314318	-0.567619	-0.371912	-0.187334	-0.142288	-0.0823859	0.114256	0.803192	0.133571	-0.526826	-0.703503	0.854783	0.933711	0.639545	-0.91899	-0.433695	-0.0195037	-0.029348	0.485313	0.038661	-0.575508	0.449349	-0.285018	-0.126953	-0.896378	0.435007	-0.802116	0.804196	0.721228	-0.463252	-0.163428	-0.798887	0.84264	0.62671	-0.0559097	0.0671767	-0.0819367	0.31078	-0.801708	-0.636837	0.25778	-0.0160252
SMEL_001g122190.1	-0.368514	-0.0919853	0.191259	0.00421424	-0.180703	0.0108054	0.194343	0.00564571	-0.151498	-0.0289586	-0.226071	-0.320347	-0.104222	0.0254417	0.196502	0.178464	-0.211381	-0.0290591	0.225594	0.248619	0.152492	-0.151166	-0.336574	0.108225	-0.0997245	-0.0428532	0.391414	-0.129534	0.0493466	0.0446157	0.261395	-0.131973	0.137879	-0.119556	0.231539	0.266526	0.145769	-0.135066	-0.0590234	0.245658	0.175079	-0.118492	-0.0268454	-0.00521383	0.445887	-0.262004	0.0434166	0.226434	0.435753
SMEL_005g228290.1	-0.225646	-0.357195	-0.313726	-0.155769	-0.298735	-0.154006	-0.246678	0.0266717	0.213658	0.114863	0.0557653	-0.286765	0.124018	0.0453895	-0.114805	-0.118297	0.269721	0.220139	-0.267978	-0.348835	-0.00910415	0.311898	-0.130997	0.110803	-0.0106304	-0.255562	0.23167	0.170674	0.016259	0.339298	0.863935	0.263479	-0.287092	0.456405	-0.00931566	-0.190146	0.232762	0.0385726	0.547357	-0.00360161	0.147512	0.0552665	-0.383545	0.376562	0.726861	0.122032	0.103227	0.249911	0.542633
SMEL_005g241460.1	0.0852603	-0.248904	-0.441564	-0.119528	-0.248963	-0.0654311	-0.242311	-0.0346174	0.176101	0.273273	0.253629	-0.295395	0.14437	-0.192425	-0.250377	-0.043484	0.311505	0.343917	-0.497763	-0.486002	-0.312424	0.433295	0.141567	0.0306186	0.0217412	-0.305938	0.221561	0.194262	-0.270614	0.312822	0.718024	0.44751	-0.207251	0.551844	-0.14325	-0.310866	0.295849	0.162984	0.61863	-0.291263	-0.0271131	-0.0900236	-0.336981	0.197967	0.362097	0.182129	0.15704	0.114457	0.435994
SMEL_005g242150.1	-0.537628	0.196077	0.880408	0.048248	-0.0303779	0.0545395	0.691421	0.234522	-0.556888	-0.36804	-0.214437	-0.120885	-0.113898	0.164492	0.749312	0.0887636	-0.571085	-0.661051	0.845769	1	0.582707	-0.911048	-0.403974	-0.0735883	-0.0859065	0.482552	-0.00664592	-0.569308	0.451757	-0.316216	-0.303814	-0.883089	0.48061	-0.823109	0.761739	0.690199	-0.442539	-0.177138	-0.850735	0.787524	0.498817	-0.0797443	0.197513	-0.155295	0.137576	-0.77694	-0.583878	0.200293	-0.133721
SMEL_000g061420.1	-0.0565104	-0.26339	-0.126243	-0.116616	-0.144686	-0.0642442	-0.157303	0.136402	0.338212	-0.0838334	-0.0139121	-0.225426	0.164983	0.0534619	-0.0409675	0.0278689	0.150661	0.000809662	-0.0597774	-0.179733	0.106523	0.107961	0.154513	0.0408105	-0.00544474	-0.19286	0.352696	0.169931	0.182344	0.238171	0.56765	0.0730816	-0.129698	0.274856	-0.102342	-0.065269	-0.0717162	0.203513	0.369475	0.108923	0.0576633	0.121619	-0.209556	0.152693	0.349419	-0.0884326	0.00194074	0.0732974	0.27367
SMEL_001g151210.1	-0.25075	0.0254132	0.44823	0.00936929	-0.191229	-0.0715345	0.370279	0.434408	-0.418673	-0.0068156	0.274333	0.137665	0.0891707	0.11751	0.468408	0.191439	-0.0949465	-0.267097	0.418379	0.435616	0.247124	-0.550491	-0.212665	0.0547218	0.152705	0.39918	0.11989	-0.258201	-0.00279267	-0.177176	-0.190331	-0.471832	0.282009	-0.469989	0.410912	0.34728	-0.288129	-0.0634228	-0.368962	0.439753	0.234292	-0.128593	-0.0808547	-0.189612	0.0180747	-0.484002	-0.435215	0.234992	0.050613
SMEL_004g201720.1	-0.392403	-0.250518	0.553891	0.115137	-0.0437067	0.0862458	0.382154	0.246973	-0.480761	-0.10051	0.112332	-0.226949	0.136408	0.127493	0.424282	0.35327	-0.11604	-0.140958	0.411232	0.448821	0.210252	-0.500018	-0.318631	0.244517	-0.0110542	0.329048	0.148074	-0.381286	0.113655	-0.0719008	0.0720226	-0.510333	0.306409	-0.408852	0.549357	0.457345	-0.128612	-0.224748	-0.383897	0.532987	0.343082	-0.275878	-0.230591	0.0814456	0.358063	-0.543252	-0.272873	0.0893042	0.208111
SMEL_003g197730.1	-0.469208	0.0252504	0.644615	0.0736828	-0.182076	0.0466343	0.462862	0.20073	-0.492573	-0.228603	-0.154853	0.0322209	-0.0502717	0.174586	0.582114	0.138825	-0.335684	-0.435558	0.706783	0.707841	0.548585	-0.645215	-0.289832	0.0414595	0.124921	0.316977	-0.0320368	-0.361935	0.369229	-0.252849	-0.202937	-0.646017	0.32029	-0.621313	0.46968	0.505516	-0.316861	-0.130777	-0.625735	0.661518	0.368054	0.00564746	-0.0299957	-0.102781	0.200506	-0.629843	-0.417579	0.256095	0.124027
SMEL_006g260300.1	-0.0276318	-0.0930949	0.151825	-0.208051	-0.0720392	0.0828013	0.262157	0.433513	-0.177735	0.0432253	0.0925739	0.227983	0.302922	0.162884	0.299586	0.393775	0.118717	-0.061569	0.216419	0.159527	0.236713	-0.225016	0.0847944	0.217681	0.394993	0.151868	0.109819	-0.0814313	-0.0903853	0.221476	-0.0643716	-0.209621	0.0999977	-0.140998	0.202869	0.0783699	-0.0539642	0.0367375	-0.135361	0.272866	0.108176	-0.246499	-0.502061	-0.153149	0.000707613	-0.327547	-0.225404	0.029433	0.0943087
SMEL_010g357190.1	0.0639578	-0.00443742	0.105428	0.0836093	-0.00442587	0.0898699	0.190437	0.159524	-0.09588	0.120933	0.117427	-0.093137	0.0176425	-0.10359	0.140427	0.219999	-0.0972671	0.0456212	0.0345604	0.191198	-0.145636	-0.159697	0.214953	-0.175482	-0.0872867	0.0185198	0.189231	-0.271851	-0.210486	-0.0615041	-0.265201	-0.0562062	0.307896	-0.0836826	0.0497667	-0.0327536	-0.0334519	0.168192	-0.089672	0.116473	-0.182342	-0.119052	0.0145842	-0.329694	-0.333319	-0.253329	0.00290797	-0.0595098	-0.0761578
SMEL_000g091530.1	0.113492	-0.362691	-0.664666	-0.112334	-0.26478	-0.120586	-0.478641	-0.166035	0.386742	0.238562	-0.0102688	-0.196825	0.0640267	-0.0080713	-0.401318	-0.238447	0.398023	0.444249	-0.591069	-0.656508	-0.374504	0.648068	0.0667657	-0.0427454	-0.0596499	-0.461779	0.151157	0.350591	-0.167865	0.24984	0.663491	0.605374	-0.460162	0.713379	-0.393973	-0.477953	0.428572	0.00847617	0.767582	-0.410796	-0.264627	0.129855	-0.17729	0.262985	0.314697	0.502218	0.344773	0.0652595	0.350049
SMEL_003g199000.1	-0.388347	0.0265755	0.661476	-0.0689204	0.0563769	-0.0673232	0.47337	0.23221	-0.489238	-0.340339	-0.154007	-0.139621	-0.111926	0.177782	0.733202	0.109718	-0.365138	-0.464086	0.646716	0.704294	0.405022	-0.702361	-0.355309	-0.136062	-0.00695217	0.308843	-0.111894	-0.45674	0.210314	-0.268967	-0.0872545	-0.700317	0.29872	-0.557784	0.610178	0.465233	-0.389132	-0.160845	-0.621599	0.703648	0.394266	-0.0451132	0.0192533	0.0174014	0.183631	-0.640145	-0.397176	0.102135	-0.0799576
SMEL_007g293920.1	-0.161799	-0.0415827	0.105472	-0.0178991	-0.00231011	-0.108605	-0.131096	-0.085285	-0.23103	-0.233292	0.0145432	-0.166475	-0.10285	0.0355882	0.0945748	-0.033595	-0.250942	0.148183	0.142848	0.168102	-0.0370064	-0.125098	-0.208576	0.0297866	-0.433641	-0.0297713	0.00107098	-0.140721	-0.0412763	-0.114894	0.00337821	0.01676	0.205807	-0.0253579	0.166183	0.126419	-0.0335503	-0.135023	-0.0347953	0.257808	-0.0618723	0.198088	0.149909	0.00451342	0.213699	-0.0521177	0.00815273	0.156786	0.11238
SMEL_003g178610.1	-0.329297	0.148148	0.186131	0.113723	0.108222	0.204534	0.087216	-0.108318	-0.104967	-0.0913284	-0.00584984	0.0931459	-0.140427	0.266593	0.10999	-0.117586	-0.100952	-0.230222	0.223954	0.329281	0.21636	-0.250949	-0.275864	-0.120401	-0.155079	0.105963	-0.186226	-0.0486436	0.327729	-0.424417	-0.356741	-0.298494	0.0622136	-0.18275	0.162583	0.315291	-0.0958837	-0.350679	-0.426036	0.312847	-0.0256151	-0.0626633	0.270933	0.131359	-0.00930253	-0.0759521	-0.0473066	-0.099878	-0.309324
SMEL_009g325840.1	-0.325811	0.147454	0.683949	0.153677	0.0445445	0.140964	0.559687	0.0662799	-0.522793	-0.300626	-0.148851	-0.0852045	-0.0510055	0.121999	0.555636	0.106699	-0.361393	-0.451213	0.606206	0.734506	0.467451	-0.675039	-0.333455	-0.000797822	-0.0317069	0.439634	-0.123417	-0.326461	0.401912	-0.302174	-0.247817	-0.70269	0.390236	-0.598497	0.580008	0.590358	-0.378139	-0.277934	-0.730102	0.554566	0.409605	-0.0862199	0.125718	-0.0507264	0.0908814	-0.55145	-0.383943	0.164824	-0.187288
SMEL_001g141930.1	0.18428	-0.130339	-0.554737	-0.103252	0.0943358	-0.0319693	-0.429225	-0.296481	0.25895	0.191874	0.00444045	0.0522322	-0.0253756	-0.130171	-0.381798	-0.119859	0.307007	0.46928	-0.419458	-0.537639	-0.29602	0.607308	0.162491	0.111166	0.0446043	-0.324321	-0.117367	0.402676	-0.338207	0.152995	0.269466	0.505609	-0.330108	0.482267	-0.486568	-0.424717	0.291602	0.0474969	0.538668	-0.395488	-0.39238	0.0829756	-0.139375	-0.0146694	0.0142544	0.44602	0.425201	-0.140337	0.13595
SMEL_008g301360.1	0.547912	-0.0233679	-0.752563	0.0369625	0.145203	0.148301	-0.624866	-0.319709	0.430341	0.265439	0.262423	0.202646	0.00154523	-0.108125	-0.758976	-0.0902917	0.405461	0.574892	-0.650211	-0.759053	-0.51523	0.749778	0.318277	-0.0817552	-0.058859	-0.439204	-0.0958798	0.548186	-0.265308	0.115229	-0.142261	0.803793	-0.284121	0.634668	-0.723914	-0.554891	0.36085	0.00587533	0.594704	-0.76681	-0.617561	0.101958	0.0732464	0.0895097	-0.363898	0.734915	0.565232	-0.266291	-0.0494773
SMEL_001g120570.1	-0.435353	-0.0670202	0.248951	-0.00768459	-0.23582	-0.123381	0.0896896	-0.0514105	0.059458	-0.313731	-0.290353	-0.213656	-0.273703	-0.0159695	0.120028	-0.38336	-0.263582	-0.32505	0.279452	0.21789	0.366293	-0.190992	-0.335322	-0.119354	-0.381383	-0.10224	0.125308	-0.032101	0.476091	-0.233521	0.518094	-0.132054	0.0279439	0.0280149	0.19209	0.358903	-0.244102	0.0749799	0.0750147	0.327898	0.352877	0.0811861	0.263082	0.113874	0.541951	-0.179353	-0.248921	0.290438	0.0831115
SMEL_005g230690.1	-0.00325968	-6.48458e-05	-0.452304	0.0178617	-0.0749724	-0.110079	-0.405274	-0.327495	0.402053	-0.0747814	-0.176487	-0.212797	-0.22998	-0.131318	-0.468012	-0.508498	0.0198148	0.268622	-0.398729	-0.405504	-0.241774	0.503083	0.00668503	-0.152089	-0.527752	-0.468776	0.0452819	0.326723	0.0859293	-0.0396352	0.48161	0.539241	-0.249493	0.545483	-0.359067	-0.174474	0.0844088	0.111342	0.606605	-0.336345	-0.255438	0.210517	0.379633	0.0784893	0.234089	0.437517	0.247441	0.0198512	-0.0308805
SMEL_009g332450.1	-0.0165326	-0.317008	-0.364741	-0.2639	-0.182721	-0.278727	-0.235732	0.0989195	0.1879	0.14045	0.040658	-0.294891	0.277796	-0.171953	-0.083254	0.294386	0.354047	0.440384	-0.232119	-0.383274	-0.0807484	0.394829	0.0553718	0.226924	0.138128	-0.312222	0.262768	0.18993	-0.323267	0.499751	0.617418	0.371859	-0.250464	0.384406	-0.158609	-0.262845	0.403579	0.201163	0.588287	-0.0650149	-0.0438127	-0.0466278	-0.5346	0.0698879	0.419276	0.0684086	0.138898	0.0951313	0.68477
SMEL_003g193140.1	0.447494	-0.219868	-0.641195	-0.204685	-0.0498852	-0.270733	-0.563506	-0.0261756	0.384108	0.230522	0.117688	0.111659	0.0887632	-0.284835	-0.473357	0.0761366	0.403065	0.55291	-0.537698	-0.739547	-0.353098	0.651225	0.236266	0.146085	0.0931158	-0.346418	-0.0107629	0.427264	-0.483796	0.412879	0.306955	0.73601	-0.357581	0.59737	-0.539608	-0.440855	0.381658	0.250006	0.777851	-0.579533	-0.344118	0.00674005	-0.292915	-0.0468231	-0.072116	0.5104	0.303113	0.000899771	0.385105
SMEL_002g164000.1	0.0478601	0.217048	0.111808	-0.136323	0.1092	-0.0970032	0.165553	-0.136783	0.0946035	-0.100939	-0.22059	-0.00244525	-0.0911612	-0.139037	-0.00580908	-0.0453357	-0.251178	-0.135515	0.00401427	0.190514	0.0407303	-0.14684	0.240045	0.0107956	-0.200472	0.207877	-0.27286	-0.0586822	0.160665	-0.231831	-0.275443	-0.0923047	0.127422	-0.178439	0.0909106	0.0874548	-0.0703285	0.191528	-0.193352	0.0271561	-0.0176882	0.24758	0.238314	-0.233775	-0.275355	0.0343702	-0.116681	-0.066271	-0.321245
SMEL_008g307820.1	-0.627771	0.0751318	0.881021	-0.0226132	-0.158843	-0.076518	0.672342	0.278988	-0.518048	-0.36955	-0.226831	-0.204197	-0.101992	0.0884428	0.760508	0.0843002	-0.514072	-0.7222	0.876924	0.910363	0.685555	-0.871314	-0.404852	-0.0447988	-0.0393021	0.355076	0.0809222	-0.440529	0.530363	-0.343804	-0.100713	-0.877461	0.418427	-0.750539	0.724245	0.747373	-0.421733	-0.161861	-0.7694	0.816101	0.601509	-0.0500221	0.100623	-0.0619243	0.310474	-0.822023	-0.59827	0.243073	0.0027692
SMEL_001g124710.1	-0.129761	-0.0404444	0.110059	-0.119875	-0.13074	-0.256741	0.0213095	0.16831	-0.207322	0.1582	0.174217	0.0417257	0.248695	0.0654858	0.17565	0.130687	0.0619467	-0.0159564	0.0709638	0.0565483	-0.00985159	-0.184147	0.0774823	0.274844	0.116106	0.172052	-0.0665781	-0.0455779	0.0534875	-0.016979	-0.0369693	-0.178467	0.0428791	-0.0207971	0.198032	0.022788	0.0811456	-0.0993361	-0.198939	0.181896	0.131287	-0.109065	-0.283399	0.315637	-0.0186869	-0.192138	-0.126408	-0.0476886	0.127486
SMEL_005g227630.1	-0.533086	0.12199	0.790878	-0.00666451	-0.101924	-0.0735883	0.698831	0.376881	-0.566644	-0.260039	-0.161569	-0.172272	0.0594985	0.0942479	0.843281	0.2724	-0.356087	-0.550832	0.761359	0.848537	0.599021	-0.839966	-0.342119	-0.0300519	0.0332232	0.465811	0.0669509	-0.499591	0.339306	-0.20755	-0.0555789	-0.823478	0.381457	-0.723313	0.766425	0.664681	-0.361871	-0.126605	-0.722813	0.795171	0.498414	-0.128517	-0.111043	-0.0638519	0.299567	-0.856375	-0.536817	0.199215	0.11542
SMEL_005g239330.1	0.0596054	-0.11193	-0.60344	-0.0555414	-0.0560373	-0.27729	-0.55894	-0.220001	0.333172	0.285753	0.0638707	-0.143603	-0.00124266	-0.0949454	-0.426938	-0.156598	0.393585	0.573172	-0.581443	-0.621937	-0.375356	0.635139	0.0312744	0.182472	-0.118719	-0.320195	-0.00579826	0.253251	-0.374676	0.320582	0.557984	0.618485	-0.219769	0.656721	-0.388263	-0.544291	0.451478	0.099311	0.732635	-0.392511	-0.226956	0.127776	-0.191267	0.194667	0.260787	0.500219	0.394878	0.0852893	0.328695
SMEL_000g004730.1	-0.581569	0.115579	0.89754	-0.0228914	-0.108629	-0.0325448	0.693901	0.314318	-0.567619	-0.371912	-0.187334	-0.142288	-0.0823859	0.114256	0.803192	0.133571	-0.526826	-0.703503	0.854783	0.933711	0.639545	-0.91899	-0.433695	-0.0195037	-0.029348	0.485313	0.038661	-0.575508	0.449349	-0.285018	-0.126953	-0.896378	0.435007	-0.802116	0.804196	0.721228	-0.463252	-0.163428	-0.798887	0.84264	0.62671	-0.0559097	0.0671767	-0.0819367	0.31078	-0.801708	-0.636837	0.25778	-0.0160252
SMEL_001g122190.1	-0.368514	-0.0919853	0.191259	0.00421424	-0.180703	0.0108054	0.194343	0.00564571	-0.151498	-0.0289586	-0.226071	-0.320347	-0.104222	0.0254417	0.196502	0.178464	-0.211381	-0.0290591	0.225594	0.248619	0.152492	-0.151166	-0.336574	0.108225	-0.0997245	-0.0428532	0.391414	-0.129534	0.0493466	0.0446157	0.261395	-0.131973	0.137879	-0.119556	0.231539	0.266526	0.145769	-0.135066	-0.0590234	0.245658	0.175079	-0.118492	-0.0268454	-0.00521383	0.445887	-0.262004	0.0434166	0.226434	0.435753
SMEL_005g228290.1	-0.225646	-0.357195	-0.313726	-0.155769	-0.298735	-0.154006	-0.246678	0.0266717	0.213658	0.114863	0.0557653	-0.286765	0.124018	0.0453895	-0.114805	-0.118297	0.269721	0.220139	-0.267978	-0.348835	-0.00910415	0.311898	-0.130997	0.110803	-0.0106304	-0.255562	0.23167	0.170674	0.016259	0.339298	0.863935	0.263479	-0.287092	0.456405	-0.00931566	-0.190146	0.232762	0.0385726	0.547357	-0.00360161	0.147512	0.0552665	-0.383545	0.376562	0.726861	0.122032	0.103227	0.249911	0.542633
SMEL_005g241460.1	0.0852603	-0.248904	-0.441564	-0.119528	-0.248963	-0.0654311	-0.242311	-0.0346174	0.176101	0.273273	0.253629	-0.295395	0.14437	-0.192425	-0.250377	-0.043484	0.311505	0.343917	-0.497763	-0.486002	-0.312424	0.433295	0.141567	0.0306186	0.0217412	-0.305938	0.221561	0.194262	-0.270614	0.312822	0.718024	0.44751	-0.207251	0.551844	-0.14325	-0.310866	0.295849	0.162984	0.61863	-0.291263	-0.0271131	-0.0900236	-0.336981	0.197967	0.362097	0.182129	0.15704	0.114457	0.435994
SMEL_005g242150.1	-0.537628	0.196077	0.880408	0.048248	-0.0303779	0.0545395	0.691421	0.234522	-0.556888	-0.36804	-0.214437	-0.120885	-0.113898	0.164492	0.749312	0.0887636	-0.571085	-0.661051	0.845769	1	0.582707	-0.911048	-0.403974	-0.0735883	-0.0859065	0.482552	-0.00664592	-0.569308	0.451757	-0.316216	-0.303814	-0.883089	0.48061	-0.823109	0.761739	0.690199	-0.442539	-0.177138	-0.850735	0.787524	0.498817	-0.0797443	0.197513	-0.155295	0.137576	-0.77694	-0.583878	0.200293	-0.133721
SMEL_000g029880.1	-0.544647	0.0844905	0.895061	-0.0476613	-0.14052	-0.0797021	0.722875	0.316936	-0.563602	-0.346305	-0.214958	-0.155305	-0.0535973	0.0708553	0.797615	0.185161	-0.497873	-0.733559	0.863031	0.925472	0.667364	-0.905398	-0.373448	-0.0154486	0.0271605	0.439921	0.0497281	-0.523973	0.461071	-0.273102	-0.166674	-0.902656	0.426878	-0.800052	0.757621	0.736239	-0.392717	-0.124315	-0.811358	0.814093	0.610825	-0.118337	0.0238519	-0.113359	0.244267	-0.85321	-0.62686	0.203658	-0.00523394
SMEL_007g288630.1	-0.47545	0.270726	0.691343	0.0430463	0.0359164	-0.0276186	0.604876	0.321123	-0.452392	-0.162541	-0.0816389	-0.0998549	0.138493	0.113884	0.714662	0.338026	-0.287314	-0.317554	0.681708	0.751031	0.461232	-0.677011	-0.179175	0.0695882	0.059482	0.443032	0.0610829	-0.260616	0.209766	-0.18553	-0.242699	-0.691686	0.392795	-0.603954	0.509379	0.541034	-0.339389	-0.0365686	-0.621438	0.709322	0.276704	-0.2162	-0.0643104	-0.233834	0.0292225	-0.733755	-0.387141	0.0852503	-0.0103661
SMEL_001g134630.1	0.384291	-0.0442308	-0.661874	-0.196114	0.0292117	-0.254414	-0.504992	-0.129713	0.336733	0.201997	-0.0351005	-0.105102	0.189481	-0.255968	-0.501534	0.112519	0.361015	0.622	-0.505599	-0.690081	-0.309666	0.704016	0.389176	0.106162	0.0448633	-0.471068	0.211021	0.531219	-0.323993	0.354693	0.314439	0.71138	-0.309107	0.634048	-0.561479	-0.465229	0.449791	0.248928	0.763253	-0.565307	-0.42424	-0.0370859	-0.233094	-0.0714974	-0.0562236	0.467598	0.479079	0.0189108	0.322821
SMEL_007g288510.1	0.303756	-0.30317	-0.729251	-0.219787	-0.191594	-0.182243	-0.483609	-0.189206	0.39104	0.382348	0.0647569	0.0121252	0.0423516	-0.205715	-0.5026	-0.181626	0.361042	0.550064	-0.705727	-0.771637	-0.445929	0.768361	0.361993	0.14258	0.0280318	-0.436663	0.0918909	0.406039	-0.46843	0.254898	0.474454	0.723776	-0.340934	0.739133	-0.568578	-0.616028	0.429171	0.193693	0.804802	-0.543949	-0.306908	0.155589	-0.242358	-0.00405957	0.0286394	0.566047	0.407737	0.0209159	0.268449
SMEL_010g339270.1	0.219081	-0.261057	-0.60445	0.0316463	-0.0604667	-0.114296	-0.561679	-0.29677	0.410743	0.172782	0.0565943	0.0569819	-0.0708459	-0.176976	-0.59014	-0.232705	0.34415	0.365471	-0.527223	-0.672942	-0.420802	0.652834	0.152914	0.0382158	-0.000679444	-0.440124	-0.0602288	0.46269	-0.239858	-0.00802352	0.266469	0.682543	-0.180622	0.613722	-0.524748	-0.414581	0.371662	0.0960263	0.647835	-0.618357	-0.369265	0.0305582	0.0210531	0.0264741	-0.0633206	0.578704	0.303479	-0.0695543	0.131759
SMEL_001g141400.1	-0.2308	0.0322365	-0.0676804	-0.0548064	-0.087397	-0.135672	-0.238328	-0.377992	-0.0274663	-0.10661	-0.242518	-0.256955	-0.382238	-0.132053	-0.108647	-0.447459	-0.331417	0.110295	-0.0619082	0.00101996	-0.189645	0.116553	-0.123106	-0.00478526	-0.456178	-0.237264	-0.0150448	0.0472573	0.0178526	-0.371552	0.191645	0.158931	0.134834	0.142299	-0.0608399	0.0452004	0.0459017	0.0400175	0.155233	-0.0811894	-0.0670017	0.243998	0.412538	-0.0360492	0.127427	0.161883	0.156428	0.225886	0.0547367
SMEL_000g091530.1	0.113492	-0.362691	-0.664666	-0.112334	-0.26478	-0.120586	-0.478641	-0.166035	0.386742	0.238562	-0.0102688	-0.196825	0.0640267	-0.0080713	-0.401318	-0.238447	0.398023	0.444249	-0.591069	-0.656508	-0.374504	0.648068	0.0667657	-0.0427454	-0.0596499	-0.461779	0.151157	0.350591	-0.167865	0.24984	0.663491	0.605374	-0.460162	0.713379	-0.393973	-0.477953	0.428572	0.00847617	0.767582	-0.410796	-0.264627	0.129855	-0.17729	0.262985	0.314697	0.502218	0.344773	0.0652595	0.350049
SMEL_000g061370.1	-0.602823	0.0466023	0.853675	-0.00103379	-0.118031	-0.121322	0.640428	0.290855	-0.599719	-0.384366	-0.250292	-0.215753	-0.0574369	0.0726701	0.785235	0.168723	-0.495113	-0.569922	0.847927	0.890485	0.612748	-0.847748	-0.479528	0.000223649	-0.084025	0.415873	0.062099	-0.530855	0.409863	-0.255076	-0.0240678	-0.798901	0.421672	-0.741697	0.798229	0.746198	-0.356853	-0.142289	-0.699446	0.823979	0.563612	-0.125678	0.042079	-0.06784	0.385165	-0.799024	-0.606783	0.31668	0.115976
SMEL_005g238230.1	-0.155431	0.174678	0.554174	-0.176748	-0.118228	0.0881381	0.569985	0.346639	-0.16739	-0.096912	-0.0497109	0.233285	-0.1159	0.0894984	0.311376	-0.00863158	-0.465958	-0.581194	0.41756	0.565639	0.429196	-0.570575	0.111729	-0.0969972	0.0389152	0.407149	0.0255886	-0.385936	0.246612	-0.133852	-0.401424	-0.520833	0.233167	-0.544959	0.312989	0.300904	-0.320518	0.0495803	-0.5557	0.4428	0.252239	0.100482	0.11693	-0.362307	-0.192607	-0.432116	-0.321511	-0.050341	-0.299961
SMEL_003g199000.1	-0.388347	0.0265755	0.661476	-0.0689204	0.0563769	-0.0673232	0.47337	0.23221	-0.489238	-0.340339	-0.154007	-0.139621	-0.111926	0.177782	0.733202	0.109718	-0.365138	-0.464086	0.646716	0.704294	0.405022	-0.702361	-0.355309	-0.136062	-0.00695217	0.308843	-0.111894	-0.45674	0.210314	-0.268967	-0.0872545	-0.700317	0.29872	-0.557784	0.610178	0.465233	-0.389132	-0.160845	-0.621599	0.703648	0.394266	-0.0451132	0.0192533	0.0174014	0.183631	-0.640145	-0.397176	0.102135	-0.0799576
SMEL_000g004100.1	-0.636365	0.052821	0.770308	0.024563	-0.103543	0.050369	0.59955	0.219011	-0.45666	-0.316789	-0.235835	-0.0251693	-0.0829192	0.196871	0.69907	0.0388034	-0.391935	-0.663994	0.748652	0.818822	0.64596	-0.785919	-0.494335	-0.0899946	0.00247817	0.406658	-0.0361451	-0.503113	0.475372	-0.283019	-0.114119	-0.800049	0.242501	-0.737808	0.669573	0.680139	-0.401097	-0.228736	-0.755956	0.775743	0.514182	0.0267017	0.109119	-0.0113279	0.374402	-0.645185	-0.508966	0.226208	0.000899143
SMEL_003g181850.1	-0.186251	0.0538457	0.43314	-0.0313851	-0.00923055	-0.246193	0.131867	0.138939	-0.205693	-0.356372	-0.223428	0.0063958	-0.294164	-0.106187	0.157984	-0.0789375	-0.466679	-0.204613	0.471418	0.400582	0.23038	-0.41447	-0.273022	0.00330168	-0.319406	0.203234	-0.0933071	-0.292869	0.201845	-0.226406	-0.217159	-0.20834	0.304644	-0.376914	0.276486	0.384406	-0.26794	-0.0423945	-0.237956	0.280154	0.150256	0.0650995	0.338658	-0.228301	-0.0429876	-0.145527	-0.349854	0.184469	-0.0980671
SMEL_004g202790.1	-0.374346	0.090618	0.871338	-0.0191379	-0.0422719	0.112036	0.749783	0.337879	-0.558557	-0.253789	-0.12687	0.0116055	0.00262336	0.088582	0.74905	0.283415	-0.474106	-0.673871	0.805354	0.91693	0.592867	-0.882698	-0.273426	0.000836444	0.149314	0.539233	0.0106958	-0.590815	0.307814	-0.167999	-0.356919	-0.881003	0.44253	-0.870296	0.730052	0.622274	-0.396662	-0.075348	-0.886046	0.748554	0.584176	-0.0619338	-0.0130914	-0.171866	0.0900987	-0.796731	-0.571533	0.0830446	-0.0458693
SMEL_007g292380.1	-0.550802	0.11696	0.902938	-0.0282468	-0.123703	-0.0645333	0.717552	0.305006	-0.579575	-0.339792	-0.200142	-0.152278	-0.0453765	0.0787789	0.801974	0.192075	-0.496703	-0.70096	0.863006	0.93686	0.649344	-0.915872	-0.378563	-0.00152862	0.00334647	0.456419	0.0353447	-0.528935	0.451529	-0.272945	-0.175635	-0.90371	0.447807	-0.794164	0.786249	0.758069	-0.413862	-0.149727	-0.823717	0.819763	0.611998	-0.105875	0.0325109	-0.103725	0.24497	-0.850986	-0.620408	0.218212	-0.0120303
SMEL_003g178610.1	-0.329297	0.148148	0.186131	0.113723	0.108222	0.204534	0.087216	-0.108318	-0.104967	-0.0913284	-0.00584984	0.0931459	-0.140427	0.266593	0.10999	-0.117586	-0.100952	-0.230222	0.223954	0.329281	0.21636	-0.250949	-0.275864	-0.120401	-0.155079	0.105963	-0.186226	-0.0486436	0.327729	-0.424417	-0.356741	-0.298494	0.0622136	-0.18275	0.162583	0.315291	-0.0958837	-0.350679	-0.426036	0.312847	-0.0256151	-0.0626633	0.270933	0.131359	-0.00930253	-0.0759521	-0.0473066	-0.099878	-0.309324
SMEL_000g064350.1	0.319814	0.017068	-0.613012	-0.0174348	0.0761421	-0.115927	-0.583109	-0.234025	0.480051	0.155577	-0.0137552	0.183095	0.0196174	-0.168111	-0.681952	-0.25409	0.211943	0.428957	-0.48162	-0.657881	-0.345511	0.659825	0.341774	-0.0020104	-0.169452	-0.446913	-0.0928372	0.664173	-0.02207	-0.00156707	-0.0202905	0.725525	-0.183101	0.648747	-0.684527	-0.357164	0.255137	0.0759394	0.604384	-0.649621	-0.525778	0.0872025	0.192624	0.00776212	-0.328043	0.620201	0.414934	-0.15475	-0.117908
SMEL_008g312510.1	0.365421	-0.0440086	-0.784141	-0.0404828	-0.00154327	-0.258669	-0.621776	-0.341303	0.51467	0.183214	-0.14775	0.01498	-0.0113053	-0.140844	-0.58509	-0.259865	0.360514	0.575834	-0.708152	-0.78555	-0.467748	0.817117	0.280841	-0.0274053	-0.174306	-0.598632	0.0465679	0.5976	-0.295737	0.168524	0.311701	0.804467	-0.383697	0.768523	-0.71454	-0.551989	0.346088	0.108007	0.824923	-0.70613	-0.56143	0.0611482	0.0209587	-0.0321326	-0.176765	0.639597	0.539782	-0.0947408	0.0469132
SMEL_009g325840.1	-0.325811	0.147454	0.683949	0.153677	0.0445445	0.140964	0.559687	0.0662799	-0.522793	-0.300626	-0.148851	-0.0852045	-0.0510055	0.121999	0.555636	0.106699	-0.361393	-0.451213	0.606206	0.734506	0.467451	-0.675039	-0.333455	-0.000797822	-0.0317069	0.439634	-0.123417	-0.326461	0.401912	-0.302174	-0.247817	-0.70269	0.390236	-0.598497	0.580008	0.590358	-0.378139	-0.277934	-0.730102	0.554566	0.409605	-0.0862199	0.125718	-0.0507264	0.0908814	-0.55145	-0.383943	0.164824	-0.187288
L.Valine	-0.0251978	0.0934427	0.115599	0.135356	0.0880769	-0.0567297	0.0269917	-0.144165	-0.0310892	-0.209692	-0.253835	-0.0287375	-0.045646	-0.0271777	-0.0276059	-0.0246893	-0.214068	-0.158752	0.215999	0.181719	0.0775241	-0.120801	0.0211779	-0.132042	-0.0620693	-0.12134	-0.152931	-0.133794	0.167773	-0.172779	-0.335203	-0.0556904	0.0581511	-0.19065	-0.0431333	-0.0146289	-0.163251	0.23524	-0.162984	-0.0589797	-0.00756597	0.0637439	0.31179	-0.133105	-0.286935	-0.00336562	-0.136372	-0.109343	-0.226006
L.Alanine	-0.35604	0.0500623	0.670336	0.00640633	-0.0419675	0.0272775	0.617075	0.197735	-0.339663	-0.161681	-0.136099	-0.0730694	0.0744563	0.0791834	0.52348	0.185075	-0.34889	-0.570199	0.601775	0.713557	0.531184	-0.694508	-0.10651	-0.0269889	0.117306	0.302109	-0.0198306	-0.424491	0.273543	-0.219461	-0.29275	-0.680009	0.263409	-0.634796	0.526934	0.497591	-0.302394	0.0832228	-0.677396	0.56785	0.450789	-0.0467267	0.0651223	-0.246001	-0.00714823	-0.66111	-0.417868	0.0303455	-0.110117
Shikimic.acid	-0.475174	0.0612684	0.816361	-0.0280029	-0.0792235	0.00451166	0.668976	0.297574	-0.566354	-0.199631	-0.0975482	-0.043742	0.00962108	0.0884584	0.718029	0.1088	-0.458613	-0.723132	0.701071	0.817859	0.512574	-0.834066	-0.279333	-0.0397335	0.140409	0.471815	0.0148407	-0.569681	0.28806	-0.220962	-0.18725	-0.871395	0.332417	-0.788896	0.718663	0.564498	-0.42472	-0.0673133	-0.810831	0.738431	0.602361	-0.040227	0.011956	-0.0471239	0.160367	-0.728705	-0.512692	0.11917	-0.0879889
Citric.acid	-0.480108	-0.0291331	0.72726	-0.197601	-0.0730872	-0.110668	0.622243	0.291537	-0.484819	-0.246554	-0.202684	-0.0857248	-0.0242063	-0.0330588	0.70073	0.197984	-0.443431	-0.625012	0.697853	0.793045	0.545103	-0.757862	-0.248094	0.0605971	0.110044	0.367116	0.0646078	-0.516683	0.207321	-0.176065	-0.139396	-0.795267	0.319321	-0.743687	0.63739	0.520561	-0.290858	0.0260714	-0.706452	0.732721	0.554987	0.00192508	-0.0759956	-0.172412	0.198094	-0.756902	-0.507044	0.16445	0.127233
Dehydroascorbic.acid	-0.478352	0.0396728	0.817395	0.03179	-0.0638312	0.0492305	0.673046	0.227565	-0.503126	-0.227053	-0.0938722	-0.119454	-0.0951776	0.0770726	0.679727	0.101775	-0.471283	-0.668839	0.657799	0.770966	0.487306	-0.771847	-0.349069	-0.127939	0.0707394	0.388283	0.0532758	-0.500353	0.286755	-0.263687	-0.0813499	-0.815801	0.287023	-0.718914	0.68336	0.571893	-0.387518	-0.0736139	-0.734724	0.692016	0.611842	-0.0886091	0.104003	-0.0279365	0.270665	-0.691742	-0.480816	0.0792026	-0.064152
Quinic.acid	-0.414161	0.0741944	0.809733	-0.0538315	-0.132591	0.000752403	0.726399	0.323097	-0.504122	-0.290144	-0.081592	0.0118163	-0.0197276	0.114123	0.675125	0.161833	-0.400837	-0.731891	0.735837	0.803393	0.49588	-0.823623	-0.304453	-0.0296939	0.154876	0.494527	0.0560239	-0.550362	0.301141	-0.182709	-0.27182	-0.84939	0.329666	-0.820658	0.643481	0.577557	-0.418351	-0.0545343	-0.813387	0.698105	0.562484	-0.0193632	0.0561083	-0.134003	0.114829	-0.710115	-0.550822	0.0986155	-0.0689921
myo.Inositol	-0.348769	0.0793141	0.658127	-0.0828122	-0.0598759	-0.0046583	0.586698	0.285543	-0.303802	-0.235115	-0.154705	0.0263334	-0.00480486	0.172703	0.540182	0.109531	-0.359006	-0.680889	0.671743	0.705608	0.618972	-0.676516	-0.31146	-0.00864387	0.224848	0.423543	0.0244857	-0.349073	0.282511	-0.169224	-0.271557	-0.761669	0.241713	-0.734542	0.49914	0.457456	-0.283577	0.0248574	-0.702234	0.57055	0.549708	0.0659107	0.121786	-0.162221	0.0853775	-0.581247	-0.477813	0.0638035	-0.0723607
Sucrose	-0.242579	-0.0085593	0.490177	-0.152118	-0.152601	-0.123544	0.514382	0.312519	-0.442173	-0.0660905	-0.0881068	-0.0942623	0.0835707	-0.0558015	0.581665	0.222755	-0.31676	-0.29808	0.416997	0.576164	0.293077	-0.566361	-0.0883179	0.0945074	0.121859	0.355002	0.00859135	-0.577935	-0.0990769	0.0177536	-0.015832	-0.501017	0.221041	-0.549794	0.618657	0.350513	-0.201225	0.086489	-0.459496	0.542952	0.444418	-0.0066666	-0.166492	-0.232024	0.207357	-0.559326	-0.427142	0.21635	0.207834
D.Fructose	-0.283327	0.129322	0.600449	0.0114735	-0.0976761	0.00101583	0.549881	0.465958	-0.440371	-0.226332	0.0581893	0.113855	0.145257	0.258716	0.531461	0.0855008	-0.295942	-0.479988	0.6408	0.60835	0.5345	-0.678658	-0.173337	-0.0955396	0.150348	0.442234	-0.0257443	-0.299836	0.300889	-0.175383	-0.250166	-0.638879	0.185548	-0.655857	0.529361	0.496155	-0.446684	-0.158256	-0.632687	0.578329	0.299026	-0.0355234	0.0359518	-0.0477087	0.0767921	-0.536182	-0.479885	0.104973	-0.16539
D.Glucose	-0.20713	0.0978169	0.590976	-0.160182	-0.057074	-0.0763871	0.521904	0.347802	-0.540991	-0.198006	-0.0406316	0.133495	0.0748943	0.0166141	0.481461	0.166607	-0.353128	-0.550423	0.647172	0.565469	0.575441	-0.599012	-0.147264	-0.0572341	0.223656	0.284569	-0.029978	-0.239846	0.340692	-0.184492	-0.352812	-0.619409	0.151773	-0.699576	0.392514	0.425196	-0.365594	-0.0940641	-0.650455	0.461828	0.411397	0.0188192	0.00121113	-0.0105903	0.055579	-0.481579	-0.450463	0.064357	-0.0369298
L.Arabinose	0.411471	0.00167944	-0.614559	0.132444	0.207055	-0.030842	-0.46589	-0.262648	0.391323	0.155247	0.0759202	0.0847377	0.175228	-0.0797614	-0.566355	-0.106536	0.390448	0.494647	-0.481685	-0.609524	-0.384722	0.626197	0.268494	0.0394866	-0.0693499	-0.370327	-0.156085	0.413545	-0.159004	0.135411	-0.0588426	0.643233	-0.324906	0.47723	-0.518129	-0.506449	0.178466	0.207378	0.507199	-0.591848	-0.405949	0.0779508	0.0728047	0.0545159	-0.237576	0.624103	0.372364	-0.223619	-0.103786
L.Malic.acid	0.218713	-0.156986	-0.082586	0.000880172	0.109216	0.134262	0.0371895	-0.176142	0.0781853	0.14645	-0.0553405	0.215015	0.0662604	-0.151235	-0.159266	-0.0259509	-0.0629627	0.106951	-0.23236	-0.104566	-0.199414	0.131938	0.124383	0.11127	0.143106	-0.00341392	-0.093358	-0.201468	-0.344943	0.124325	-0.0882825	0.168109	0.0627487	0.0240942	-0.172492	-0.264156	0.0763655	0.264674	0.040282	-0.208117	0.133248	0.0902715	0.028193	-0.210315	-0.179424	0.181967	0.0126805	-0.0811801	-0.0922889
L.Serine	-0.407949	0.0967234	0.764161	0.0558435	-0.0600942	-0.068358	0.655893	0.30475	-0.467231	-0.324555	-0.128063	-0.017092	0.0869753	0.178474	0.642238	0.216227	-0.432362	-0.599877	0.719393	0.773304	0.509567	-0.774152	-0.212724	-0.0431182	0.0819159	0.368347	0.00145768	-0.488694	0.32212	-0.243699	-0.290181	-0.750794	0.273274	-0.758311	0.59161	0.504715	-0.440146	0.059214	-0.715398	0.666704	0.459332	-0.038956	0.0825286	-0.172012	0.0771707	-0.672266	-0.54257	0.127887	-0.0998991
L.Isoleucine	0.315888	-0.101508	-0.256297	-0.0330324	0.0306072	0.0375941	-0.327304	-0.202257	-0.000944026	0.0936476	0.0165804	0.113708	-0.105026	-0.138627	-0.195411	-0.0564146	0.129925	0.169184	-0.193364	-0.217727	-0.201559	0.217922	0.0896756	-0.00551232	0.0072416	-0.0531321	-0.140724	-0.0936933	-0.148465	0.0829449	-0.0862948	0.249808	0.0117049	0.139377	-0.058612	-0.201708	0.0447587	0.0184367	0.143364	-0.309899	-0.0209006	0.0950767	-0.092219	0.087058	-0.104462	0.23923	0.0627393	0.00258483	0.103642
L.Leucine	0.0490563	0.132265	-0.0736585	-0.0859855	0.0051744	-0.00612989	0.0247719	-0.0804321	-0.0567489	-0.027605	0.141242	-0.116337	-0.205947	-0.206258	-0.0417653	-0.0156522	-0.111275	0.0515925	-0.0695292	0.0200334	-0.22368	0.0384028	-0.0179299	0.0625005	-0.333977	-0.0337253	-0.0309508	-0.319632	-0.122087	0.0772378	-0.100595	0.0704856	0.079079	-0.0682688	0.0398385	-0.115017	-0.131185	-0.056765	0.0203069	0.0357992	0.0414425	0.26682	0.159217	-0.0329901	0.0653456	0.172947	-0.0812977	-0.0796445	-0.1295
L.Proline	0.250203	-0.0581076	-0.12678	0.130022	0.0452117	0.0631504	-0.143793	-0.157098	0.129689	-0.0589593	-0.157223	0.0941197	-0.0604296	-0.0240927	-0.213516	0.00748532	0.0481674	0.146496	-0.0570348	-0.145421	0.0189671	0.156264	-0.0150844	-0.0548506	0.0333837	-0.238938	-0.137848	0.0818897	-0.0204961	0.000952417	-0.172883	0.237402	-0.126173	0.0564659	-0.248781	-0.0854178	-0.0813225	0.0532527	0.109972	-0.175621	-0.0960827	0.0314974	0.148262	-0.148481	-0.0917517	0.259307	0.134647	-0.0865182	-0.129054
Glycine	-0.285654	0.219067	0.691988	0.0380582	-0.0526442	-0.0684279	0.491168	0.249292	-0.489168	-0.230174	-0.0795329	0.0189416	-0.019499	0.0576355	0.497269	0.126494	-0.441817	-0.504338	0.676439	0.655751	0.513158	-0.673296	-0.112069	-0.0305865	0.0587212	0.319816	-0.0292159	-0.31255	0.2887	-0.381173	-0.424259	-0.614974	0.399093	-0.628581	0.454435	0.616506	-0.386512	-0.100527	-0.700216	0.545097	0.317469	-0.138599	0.137632	-0.160261	-0.0924859	-0.60846	-0.368595	0.176096	-0.171072
L.Threonine	-0.0277591	0.0175804	0.235051	0.346867	0.0394934	0.195678	0.347194	0.0591571	-0.111382	0.0483889	0.0680018	-0.0604048	0.0723857	0.0522478	0.126371	0.196183	-0.154511	-0.0429092	0.19245	0.240529	0.073248	-0.193294	0.102831	0.0897782	0.0922814	0.127033	0.139972	-0.285647	-0.025135	-0.0566036	-0.235953	-0.171433	0.214014	-0.237563	0.0869017	-0.0365984	-0.149453	0.141953	-0.197409	0.156285	0.0746028	-0.166147	0.0270134	-0.204151	-0.188936	-0.196417	-0.15236	-0.101594	-0.179323
L.Aspartic.acid	-0.415407	0.0613647	0.625922	0.0115447	-0.0650724	-0.143338	0.413055	-0.0721876	-0.448804	-0.397661	-0.386941	-0.10926	-0.226175	-0.0958689	0.473646	-0.0626883	-0.450189	-0.528026	0.624176	0.614532	0.423173	-0.551883	-0.285896	-0.177872	-0.290686	0.159962	-0.143205	-0.339887	0.487223	-0.49414	-0.145852	-0.542109	0.367747	-0.514688	0.427667	0.555776	-0.452019	-0.07192	-0.547375	0.547114	0.375409	0.0431303	0.302669	-0.0776669	0.121622	-0.448391	-0.436003	0.177931	-0.18998
L.Cysteine	-0.0908763	0.0120486	0.330564	0.0184237	0.00395591	-0.186055	0.237936	0.151212	-0.189869	-0.163786	-0.170206	0.0885016	0.0725147	-0.0910127	0.166636	0.17104	-0.215762	-0.212859	0.34604	0.29407	0.214555	-0.323006	0.0829571	0.117981	0.12559	0.0311656	0.00470593	-0.0885839	0.105443	-0.140684	-0.275634	-0.281772	0.0329549	-0.381213	0.0604647	0.25406	-0.289287	0.158601	-0.300538	0.241279	0.150597	-0.00272694	-0.007547	-0.242194	-0.138018	-0.282766	-0.193287	0.0502578	-0.0575209
L.Glutamic.acid	-0.255045	0.217688	0.467891	-0.01738	0.10789	-0.0849828	0.323736	0.145431	-0.294646	-0.232521	-0.271173	-0.0181855	-0.0483855	0.0910748	0.353393	0.10087	-0.301709	-0.364861	0.503621	0.50864	0.382055	-0.517638	-0.188884	-0.0364978	-0.0899287	0.31613	-0.205423	-0.404926	0.350314	-0.160169	-0.2733	-0.453342	0.0248551	-0.583415	0.425375	0.425473	-0.301471	0.085964	-0.504266	0.423068	0.264679	0.110195	0.232541	-0.00144912	0.114019	-0.279922	-0.356415	0.0309478	-0.216725
L.Phenylalanine	0.10852	0.0609638	0.143777	0.09308	0.218553	-0.0358632	0.0137768	-0.0382828	-0.049856	-0.12874	-0.172462	0.0887939	0.0147109	-0.1022	-0.119717	0.152198	-0.147023	-0.0731676	0.158146	0.0517164	-0.00764797	-0.0559499	0.0944565	-0.0258651	0.00387208	-0.0655044	-0.106615	-0.057768	0.00012701	-0.0234512	-0.361295	0.00965729	-0.00726202	-0.258456	-0.0945811	0.102154	-0.0782511	0.231077	-0.146339	-0.102983	-0.0699025	0.0576918	0.26276	-0.167612	-0.229672	0.024621	0.0353383	-0.169332	-0.217616
L.Asparagine	-0.230136	0.104463	0.450403	0.0188793	-0.0322065	-0.134929	0.309364	0.0404674	-0.434195	-0.273606	-0.188621	-0.0125483	0.0994428	0.0818184	0.457535	-0.00677297	-0.355293	-0.340696	0.448359	0.526542	0.338014	-0.500161	-0.102255	0.00163208	-0.0536618	0.167262	-0.162385	-0.266351	0.390041	-0.297378	-0.256871	-0.46301	0.265735	-0.457197	0.416688	0.410147	-0.441787	-0.154061	-0.521852	0.4614	0.271707	0.0115619	0.105143	-0.049828	-0.0177484	-0.37959	-0.401025	0.35507	-0.154417
Succinic.acid	-0.120901	0.245328	0.347028	0.163723	0.185976	0.0328061	0.342488	0.0519397	-0.266466	-0.187568	-0.197434	-0.035098	0.15969	0.0609658	0.302705	0.324602	-0.0739498	-0.190985	0.390041	0.380051	0.255071	-0.298878	-0.123225	0.0154845	0.21956	0.141844	-0.0406767	-0.153637	0.159139	-0.0507986	-0.305113	-0.379507	-0.00835836	-0.517718	0.250615	0.217427	-0.151886	0.123095	-0.469844	0.230436	0.186087	-0.0798611	0.0344729	-0.027003	0.00356745	-0.258771	-0.131236	-0.0665223	-0.0779699
Glyceric.acid	-0.372876	0.111041	0.763594	0.0221468	-0.0342575	-0.0504762	0.661899	0.218186	-0.45842	-0.274546	-0.140634	-0.0352446	0.0320597	0.0726368	0.606072	0.261813	-0.42972	-0.568107	0.719449	0.777667	0.500035	-0.746167	-0.214722	0.0207704	0.101993	0.425468	-0.0338773	-0.501109	0.278841	-0.223946	-0.340229	-0.743387	0.301614	-0.750045	0.548141	0.475381	-0.3475	0.0767863	-0.718119	0.645352	0.495504	-0.0081637	0.0934286	-0.217616	0.0399951	-0.627653	-0.548531	0.065534	-0.0737535
Fumaric.acid	-0.397382	0.0157167	0.674198	0.203309	-0.0566967	0.182987	0.584279	0.236915	-0.388874	-0.173046	-0.0908605	-0.0233018	0.00100133	0.312931	0.540256	0.221243	-0.321596	-0.471857	0.64565	0.693552	0.430692	-0.666692	-0.289861	-0.0511848	0.153085	0.359516	0.0540852	-0.489959	0.146569	-0.225598	-0.239336	-0.653634	0.31749	-0.626306	0.516384	0.390293	-0.303438	-0.014431	-0.627985	0.618528	0.401242	-0.169627	0.0525797	-0.175855	0.102666	-0.617244	-0.341231	0.0291823	-0.0151796
Pyroglutamic.acid	0.243683	-0.0423923	-0.579923	-0.0983749	0.0928755	-0.0583276	-0.346856	-0.186783	0.336132	0.276795	0.0975939	0.150426	0.0347943	-0.0655907	-0.445188	-0.172488	0.174923	0.407216	-0.549821	-0.556668	-0.359581	0.598737	0.266085	0.0336151	-0.0260037	-0.356134	-0.100234	0.28056	-0.376486	0.0817198	0.0352766	0.60005	-0.26524	0.41659	-0.541413	-0.514992	0.277782	0.261278	0.493676	-0.528499	-0.420336	0.0737096	0.0597273	-0.0567082	-0.129504	0.531141	0.327941	-0.171964	-0.00172065
Oxalic.acid	-0.146068	0.221433	0.43359	0.245414	-0.0481478	0.0326179	0.265524	0.0194418	-0.238892	-0.303758	-0.13464	-0.114996	-0.102752	0.156194	0.324323	-0.0307341	-0.172143	-0.293918	0.469987	0.428682	0.356521	-0.337686	-0.247897	-0.273283	0.0120331	0.0311155	-0.0355779	-0.0483628	0.245136	-0.273647	-0.157121	-0.30957	0.234129	-0.244795	0.216246	0.367875	-0.193551	-0.0819223	-0.316468	0.300934	0.180176	-0.157079	0.204671	-0.179865	-0.0319922	-0.413643	-0.10428	0.0642961	-0.120283
M1118T1173	-0.470212	0.218759	0.740258	-0.0601604	-0.0618195	-0.0766492	0.558545	0.251915	-0.449923	-0.341196	-0.18868	0.0278284	-0.0855122	0.0763245	0.623299	0.0524777	-0.496992	-0.593233	0.770646	0.784809	0.614313	-0.773073	-0.315901	0.00884795	-0.0231337	0.470781	0.00936092	-0.383306	0.37269	-0.366366	-0.282415	-0.771169	0.283194	-0.761081	0.558381	0.569549	-0.525712	-0.0201786	-0.693237	0.683104	0.533453	0.092955	0.204544	-0.16371	0.115203	-0.557517	-0.568875	0.236619	-0.081513
M1066T1069	0.41945	-0.133014	-0.654791	0.163596	0.119911	0.085308	-0.587049	-0.308333	0.470439	0.235168	0.0933867	0.11056	-0.0581366	-0.0389812	-0.624872	-0.101966	0.453062	0.523478	-0.569366	-0.678345	-0.394028	0.672995	0.140428	-0.118466	-0.0303716	-0.456705	-0.130999	0.580934	-0.196984	0.0670348	0.0275541	0.696765	-0.319882	0.679203	-0.606264	-0.388801	0.441693	-0.0359178	0.5706	-0.653725	-0.531621	-0.0149591	0.0758737	0.0495141	-0.202036	0.576195	0.567065	-0.223458	-0.0123362
M869T830	0.0116322	0.0662431	0.273825	0.0562471	0.0103017	0.104586	0.109022	0.2363	-0.194655	0.0372348	0.309229	-0.0940273	0.0413465	0.146548	0.202743	0.242526	-0.0330445	-0.0910812	0.195705	0.255729	-0.046005	-0.265191	0.0161175	0.0806043	0.0866993	0.157646	0.0729338	-0.126684	-0.0360679	0.0274729	-0.257233	-0.248346	0.426015	-0.126294	0.150708	0.134259	0.00781097	-0.204988	-0.198043	0.144272	-0.0747297	-0.315269	-0.198409	-0.112078	-0.209774	-0.396395	-0.0724123	-0.0650581	-0.0582949
M862T924	0.24008	0.0656517	-0.481579	0.175345	0.194683	-0.0897751	-0.484462	-0.181751	0.417032	0.0489337	-0.0179625	0.0579883	0.0521963	-0.0124186	-0.503496	-0.12826	0.338356	0.411302	-0.299771	-0.510927	-0.163116	0.50805	0.140663	-0.0645921	-0.0948136	-0.371559	-0.0939409	0.709023	0.0484603	-0.0836501	-0.0813522	0.538791	-0.303091	0.467823	-0.536854	-0.159302	0.185723	0.0761313	0.454166	-0.538544	-0.53598	-0.0595641	0.253028	0.0195993	-0.275388	0.470969	0.338042	-0.12724	-0.132127
M885T703	0.0373113	0.223701	-0.178497	0.212614	0.161751	-0.169956	-0.228734	-0.146196	0.229733	-0.205919	-0.183083	0.0404924	-0.0217211	-0.0236571	-0.252037	-0.197793	0.0929833	0.159608	0.00482752	-0.184064	0.0376532	0.179201	0.00753834	-0.16616	-0.229943	-0.191731	-0.0909086	0.495364	0.24038	-0.309422	-0.13541	0.247816	-0.260159	0.136514	-0.27696	0.106137	-0.10154	0.110375	0.175997	-0.256921	-0.310096	0.0286584	0.460105	-0.0590084	-0.186635	0.282027	0.0954574	-0.00024791	-0.206519
M887T705	0.220426	0.113118	-0.415624	0.19652	0.15884	-0.152536	-0.436315	-0.204281	0.388558	-0.0463038	-0.10032	0.0712312	0.0199507	-0.0280487	-0.447853	-0.173769	0.282627	0.331269	-0.242838	-0.442455	-0.142928	0.440743	0.127002	-0.14154	-0.138344	-0.36576	-0.107763	0.690529	0.0995684	-0.156486	-0.096322	0.486294	-0.308582	0.409102	-0.49961	-0.0740607	0.133236	0.0928966	0.398728	-0.511393	-0.517788	-0.0618883	0.309908	-0.0492876	-0.295064	0.409413	0.308374	-0.101657	-0.172939
M971T749	-0.208325	0.3303	0.210774	0.0459167	0.11241	-0.153488	0.0798965	-0.0252042	-0.0814399	-0.296715	-0.212096	0.0694921	-0.0977822	-0.0194816	0.104696	-0.135636	-0.220285	-0.148035	0.385824	0.257054	0.316963	-0.22938	-0.169905	-0.0276592	-0.194687	0.135524	-0.0773968	0.109287	0.299119	-0.392327	-0.285408	-0.20531	-0.0405572	-0.326415	0.0425958	0.263075	-0.405693	0.0848029	-0.211561	0.150645	0.107196	0.178857	0.436053	-0.0958699	-0.0766764	0.0323586	-0.225501	0.128228	-0.168995
M971T770	-0.140961	0.353581	0.143106	0.0681232	0.0530064	-0.144972	0.051866	-0.0532174	-0.0375364	-0.291377	-0.177347	0.0905685	-0.115317	-0.01306	0.0326986	-0.185179	-0.170802	-0.100352	0.287914	0.166943	0.244786	-0.155723	-0.136615	-0.114742	-0.235966	0.0809762	-0.0974687	0.172806	0.260045	-0.407839	-0.238581	-0.104827	-0.120069	-0.231955	-0.0192035	0.264713	-0.382032	0.092233	-0.137856	0.0826434	0.0391149	0.171827	0.461959	-0.100871	-0.0665391	0.0938805	-0.153863	0.111341	-0.177836
M1003T1070	0.393725	0.0724689	-0.729886	0.0121871	0.0823667	-0.133189	-0.585996	-0.270064	0.466965	0.132373	0.0852702	-0.0588339	0.129497	-0.0828122	-0.621367	-0.129232	0.412018	0.576271	-0.648633	-0.751526	-0.473945	0.772678	0.354675	-0.0871125	-0.088159	-0.564985	0.014999	0.7005	-0.232375	0.179671	0.19373	0.771536	-0.336558	0.719732	-0.652871	-0.423932	0.392112	0.0743195	0.719723	-0.725449	-0.664601	-0.0735918	0.0261989	0.0221553	-0.211199	0.55955	0.543375	-0.158438	-0.0227662
M952T757	-0.152186	0.321134	0.149499	0.0526787	0.0356772	-0.142514	0.0514648	-0.0507758	-0.05046	-0.284431	-0.191591	0.0971841	-0.132106	-0.0417989	0.0479665	-0.197026	-0.182162	-0.122156	0.295754	0.174558	0.253338	-0.166619	-0.155126	-0.113615	-0.222129	0.0874132	-0.104335	0.128007	0.257756	-0.401697	-0.213842	-0.114805	-0.129112	-0.250653	0.0041176	0.263391	-0.384764	0.0944922	-0.146038	0.0979578	0.0868776	0.192441	0.452372	-0.0872395	-0.0267909	0.100265	-0.176253	0.129136	-0.155403
M866T819	0.0404357	0.0765495	-0.115125	0.186328	0.294522	-0.0127868	-0.267714	0.00999256	0.0710409	-0.00608244	0.0491355	-0.0507571	0.106702	0.00308136	-0.15486	0.229292	0.173944	0.417407	0.065085	-0.0804205	-0.0264665	0.112042	-0.104281	0.176366	-0.128476	-0.0106226	-0.0272806	0.240274	-0.0482037	0.0611316	-0.163297	0.214283	0.0797538	0.0751731	-0.0595373	0.0127552	0.074157	-0.0397874	0.179732	-0.161371	-0.223569	-0.0341551	0.0914044	-0.0899002	-0.0399607	0.132315	0.0838363	0.0315701	0.14019
B.	SMEL_008g312160.1	SMEL_002g161810.1	SMEL_001g115360.1	SMEL_003g186060.1	SMEL_009g321940.1	SMEL_005g228020.1	SMEL_000g033540.1	SMEL_011g377500.1	SMEL_006g261320.1	SMEL_001g123750.1	SMEL_010g337250.1	SMEL_002g167350.1	SMEL_012g398810.1	SMEL_001g123420.1	SMEL_003g195740.1	SMEL_010g360980.1	SMEL_005g230780.1	SMEL_003g183980.1	SMEL_001g116660.1	SMEL_005g242150.1	SMEL_001g150880.1	SMEL_005g228550.1	SMEL_011g362280.1	SMEL_010g360640.1	SMEL_010g351040.1	SMEL_006g267290.1	SMEL_007g282260.1	SMEL_009g333060.1	SMEL_004g219260.1	SMEL_006g262400.1	SMEL_007g277290.1	SMEL_007g277310.1	SMEL_009g330200.1	SMEL_012g382160.1	SMEL_000g085440.1	SMEL_007g279110.1	SMEL_003g198560.1	SMEL_006g259800.1	SMEL_006g265210.1	SMEL_007g292070.1	SMEL_003g180460.1	SMEL_001g129900.1	SMEL_001g139740.1	SMEL_001g123620.1	SMEL_003g177010.1	SMEL_003g180470.1	SMEL_000g109110.1	SMEL_003g196100.1	SMEL_004g216950.1
SMEL_008g312160.1	NA	0.973649	4.86967e-05	0.664852	0.10977	0.19159	0.0362037	0.443365	0.0055021	0.24024	0.431515	0.0274001	0.342606	0.148017	0.000122472	0.0476247	0.00111405	0.00179103	5.51832e-05	1.11707e-06	0.00185043	9.9759e-06	6.67215e-07	0.507875	0.0178663	0.491781	0.625549	0.0382214	9.56487e-05	0.00221041	0.0590625	3.78339e-06	0.0463642	0.0154367	9.03177e-06	1.54699e-05	0.0992742	0.0114082	0.00133182	2.63653e-08	0.00663779	0.562989	0.175625	0.0445929	2.05669e-07	0.00025456	0.000801352	0.014687	0.59837
SMEL_002g161810.1	0.973649	NA	0.327937	0.913463	0.837412	0.100194	0.0629204	0.546028	0.755727	0.127209	0.266777	0.764425	0.686321	0.398221	0.266999	0.908429	0.209707	0.639653	0.172624	0.0987966	0.333117	0.23814	0.19676	0.437426	0.106381	0.0373185	0.828118	0.711171	0.513509	0.13782	0.0632274	0.571186	0.183942	0.365453	0.875182	0.132089	0.0238337	0.859045	0.180907	0.614757	0.594807	0.97569	0.0491767	0.046054	0.0200987	0.695397	0.739678	0.54343	0.0195341
SMEL_001g115360.1	4.86967e-05	0.327937	NA	0.430074	0.947721	0.585545	5.68834e-12	0.0104893	6.81055e-07	0.00354696	0.362204	0.702278	0.339235	0.347828	4.44635e-11	0.272691	8.70008e-08	2.37521e-12	0	0	1.53016e-07	0	0.00376091	0.879157	0.851974	7.08045e-06	0.722697	5.34061e-06	0.000251332	0.00336253	0.0292105	0	1.10469e-06	2.22045e-16	4.32294e-11	1.48193e-12	6.82616e-05	0.179421	0	5.59552e-14	1.77035e-08	0.148257	0.244602	0.169129	0.335379	0	3.024e-07	0.239646	0.182028
SMEL_003g186060.1	0.664852	0.913463	0.430074	NA	0.896052	2.31985e-05	0.617657	0.767861	0.757814	0.448689	0.967073	0.529913	0.411272	0.00506016	0.572901	0.668432	0.0728891	0.443161	0.267738	0.68734	0.570928	0.693937	0.0802506	0.0361614	0.403023	0.235138	0.24114	0.82013	0.535517	0.117399	0.448851	0.927235	0.368305	0.607044	0.463629	0.640461	0.253224	0.692076	0.458629	0.523479	0.418038	0.207224	0.00550486	0.923587	0.214657	0.984137	0.331882	0.46415	0.200798
SMEL_009g321940.1	0.10977	0.837412	0.947721	0.896052	NA	0.592377	0.105012	0.0187392	0.214447	0.165956	0.374826	0.873357	0.468053	0.321775	0.544892	0.186372	0.350777	0.525192	0.88111	0.800027	0.446564	0.296724	0.922152	0.307269	0.993543	0.732403	0.0586764	0.29207	0.709625	0.59162	0.0368754	0.740857	0.789522	0.653784	0.318092	0.265371	0.774057	0.342594	0.785237	0.270003	0.235919	0.38372	0.630043	0.901819	0.018914	0.285573	0.508513	0.185453	0.0386158
SMEL_005g228020.1	0.19159	0.100194	0.585545	2.31985e-05	0.592377	NA	0.491232	0.831917	0.756129	0.112793	0.0123882	0.075892	0.0984146	0.0105147	0.204446	0.841447	0.637854	0.734571	0.97326	0.649093	0.465768	0.707661	0.340785	0.0127723	0.0567508	0.0959414	0.100866	0.0904151	0.678558	0.688845	0.0743745	0.680215	0.316526	0.373228	0.686333	0.979388	0.593763	0.174623	0.173191	0.536121	0.995148	0.510839	0.14327	0.61778	0.514665	0.701336	0.0797673	0.0830883	0.26103
SMEL_000g033540.1	0.0362037	0.0629204	5.68834e-12	0.617657	0.105012	0.491232	NA	0.000145943	0.000367007	0.343323	0.642711	0.880652	0.497078	0.51118	5.45855e-10	0.0163692	0.0202267	2.06902e-06	2.60894e-07	1.77156e-11	1.28791e-05	7.03522e-11	0.691024	0.198354	0.164797	2.43234e-05	0.0750198	0.00101169	0.195763	0.157544	0.0996527	1.01514e-10	0.0178284	9.53999e-10	2.92176e-06	2.57072e-05	0.00584334	0.55918	6.91965e-10	4.16801e-08	0.000126976	0.0795726	0.93615	0.0030711	0.953058	2.92344e-12	5.9015e-05	0.870408	0.392178
SMEL_011g377500.1	0.443365	0.546028	0.0104893	0.767861	0.0187392	0.831917	0.000145943	NA	0.190127	0.369205	0.0689386	0.112405	0.00137601	0.0376496	0.00901523	0.00580608	0.985767	0.427778	0.0132264	0.0473779	0.0144014	0.00033604	0.176343	0.713731	0.0138866	0.00363563	0.00407794	0.135472	0.632459	0.039813	0.491687	0.0228246	0.591656	0.00742853	0.028097	0.135723	0.0416517	0.735534	0.130076	0.00153295	0.570577	0.0645336	0.00248699	0.0315926	0.984484	6.98643e-05	0.0472682	0.29335	0.241959
SMEL_006g261320.1	0.0055021	0.755727	6.81055e-07	0.757814	0.214447	0.756129	0.000367007	0.190127	NA	0.0998575	0.924926	0.681268	0.924128	0.856282	5.10228e-07	0.351738	0.00129508	0.0266001	3.13711e-05	3.77156e-07	0.133952	6.54206e-07	0.00990681	0.806445	0.582831	0.0207861	0.958112	5.15108e-05	0.278754	0.0357011	0.340626	4.01927e-06	0.00276958	3.15958e-06	2.61452e-08	0.00234698	0.0399601	0.0518838	2.92852e-06	1.57084e-05	0.00717066	0.434743	0.618381	0.563716	0.184437	3.28373e-05	0.0240144	0.00858668	0.744406
SMEL_001g123750.1	0.24024	0.127209	0.00354696	0.448689	0.165956	0.112793	0.343323	0.369205	0.0998575	NA	0.00400262	0.181822	0.975387	0.977084	0.101211	0.671337	0.00392407	0.0110328	1.64525e-05	0.00146919	0.0263733	0.0293385	0.0389775	0.0870674	0.0757328	0.751129	0.826031	0.895066	0.000404294	0.159211	0.873777	0.0238829	0.507158	0.00630079	0.152719	0.0033969	0.0135289	0.567686	0.0703974	0.0075141	0.687966	0.142235	0.00376486	0.246819	0.406425	0.0856986	0.0107823	0.0829829	0.215728
SMEL_010g337250.1	0.431515	0.266777	0.362204	0.967073	0.374826	0.0123882	0.642711	0.0689386	0.924926	0.00400262	NA	0.157126	0.525519	0.604124	0.0368895	0.331594	0.0814553	0.0886338	0.0230601	0.0704788	0.00321922	0.601563	0.197472	0.301553	0.209699	0.26963	0.303136	0.963572	0.00166259	0.185915	0.556004	0.340354	0.807099	0.217846	0.401532	0.0275377	0.250309	0.783735	0.29344	0.528621	0.545738	0.601045	0.0286126	0.513105	0.893651	0.503315	0.707611	0.368758	0.351565
SMEL_002g167350.1	0.0274001	0.764425	0.702278	0.529913	0.873357	0.075892	0.880652	0.112405	0.681268	0.181822	0.157126	NA	0.542804	0.0361553	0.241273	0.494975	0.599475	0.941678	0.205412	0.311774	0.965585	0.876534	0.310211	0.339115	0.0360926	0.0281332	0.40755	0.876401	0.233539	0.553568	0.00104892	0.526298	0.708733	0.958825	0.178097	0.23034	0.479173	0.837555	0.475055	0.18567	0.192791	0.784895	0.626492	0.34435	0.00279985	0.200751	0.832024	0.354378	0.038413
SMEL_012g398810.1	0.342606	0.686321	0.339235	0.411272	0.468053	0.0984146	0.497078	0.00137601	0.924128	0.975387	0.525519	0.542804	NA	0.559527	0.228551	5.08126e-05	0.00854999	0.0346384	0.521218	0.340768	0.845186	0.749731	0.00170557	0.0368231	0.0075216	0.954526	0.372775	0.164658	0.241773	3.42656e-05	0.506549	0.517051	0.360049	0.791696	0.77937	0.279881	0.998748	0.0140419	0.377155	0.612379	0.557014	0.69798	6.02518e-06	0.345923	0.55786	0.262699	0.588032	0.73119	0.112802
SMEL_001g123420.1	0.148017	0.398221	0.347828	0.00506016	0.321775	0.0105147	0.51118	0.0376496	0.856282	0.977084	0.604124	0.0361553	0.559527	NA	0.309452	0.316536	0.710816	0.539365	0.465157	0.167354	0.279657	0.0605724	0.0756475	0.137449	0.269643	0.0254572	0.627602	0.230037	0.20456	0.502517	0.66643	0.0413006	0.43847	0.32607	0.107944	0.808834	0.324571	0.0136077	0.123695	0.0491585	0.151904	0.364502	0.81977	0.264371	0.450539	0.262719	0.651776	0.636438	0.227016
SMEL_003g195740.1	0.000122472	0.266999	4.44635e-11	0.572901	0.544892	0.204446	5.45855e-10	0.00901523	5.10228e-07	0.101211	0.0368895	0.241273	0.228551	0.309452	NA	0.0249693	0.00364451	3.4463e-06	1.24928e-09	3.70814e-14	5.12118e-05	1.55431e-14	0.0239082	0.813904	0.324708	0.000599027	0.630437	6.13869e-06	0.0739078	0.121517	0.841886	1.17684e-14	0.00880797	6.63026e-09	1.75862e-11	3.31338e-06	0.000386043	0.81526	1.3592e-09	4.88498e-15	3.62355e-05	0.435202	0.21166	0.651547	0.100856	1.9984e-15	4.59254e-06	0.00912034	0.761621
SMEL_010g360980.1	0.0476247	0.908429	0.272691	0.668432	0.186372	0.841447	0.0163692	0.00580608	0.351738	0.671337	0.331594	0.494975	5.08126e-05	0.316536	0.0249693	NA	0.0352145	0.204078	0.158776	0.45841	0.607791	0.148313	0.0371843	0.0526937	0.00090678	0.250566	0.0774118	0.374962	0.0570189	0.000821538	0.105106	0.325507	0.518552	0.0357039	0.593875	0.825185	0.381141	0.0111863	0.360661	0.240349	0.910809	0.0972255	2.87953e-06	0.0495854	0.291041	0.000959488	0.451593	0.175635	0.000819216
SMEL_005g230780.1	0.00111405	0.209707	8.70008e-08	0.0728891	0.350777	0.637854	0.0202267	0.985767	0.00129508	0.00392407	0.0814553	0.599475	0.00854999	0.710816	0.00364451	0.0352145	NA	3.08468e-06	3.03547e-05	1.61965e-07	0.00889063	1.16302e-05	0.124867	0.885578	0.0755237	0.341747	0.929706	0.0087445	0.0244692	0.0022377	0.262773	8.42909e-05	6.63298e-05	0.000192409	0.000750506	0.00132942	0.00189192	0.0965506	4.3595e-05	0.00079184	0.00284996	0.880789	0.00261311	0.391623	0.454612	0.00770176	0.000243687	0.0202803	0.0369346
SMEL_003g183980.1	0.00179103	0.639653	2.37521e-12	0.443161	0.525192	0.734571	2.06902e-06	0.427778	0.0266001	0.0110328	0.0886338	0.941678	0.0346384	0.539365	3.4463e-06	0.204078	3.08468e-06	NA	9.24844e-09	2.61965e-10	3.75382e-07	2.27782e-11	0.0107071	0.0517839	0.582182	0.0417042	0.754955	0.00400766	1.37629e-06	0.000825055	0.0708406	4.88498e-15	0.0863986	1.66619e-08	6.10255e-05	2.40201e-07	0.00384273	0.338576	5.07594e-13	3.79723e-06	2.80017e-07	0.662309	0.0155735	0.779994	0.455359	6.0485e-07	1.73022e-05	0.770254	0.00816554
SMEL_001g116660.1	5.51832e-05	0.172624	0	0.267738	0.88111	0.97326	2.60894e-07	0.0132264	3.13711e-05	1.64525e-05	0.0230601	0.205412	0.521218	0.465157	1.24928e-09	0.158776	3.03547e-05	9.24844e-09	NA	0	2.95186e-12	0	0.000852284	0.937152	0.61143	0.002438	0.588597	0.00163932	9.93195e-07	0.019019	0.024109	2.88658e-15	0.000269921	4.44089e-16	3.06466e-08	3.1688e-12	3.57345e-05	0.409812	5.84865e-13	2.77156e-12	4.49466e-06	0.487385	0.103173	0.308567	0.217975	2.51221e-12	4.11997e-07	0.159595	0.715526
SMEL_005g242150.1	1.11707e-06	0.0987966	0	0.68734	0.800027	0.649093	1.77156e-11	0.0473779	3.77156e-07	0.00146919	0.0704788	0.311774	0.340768	0.167354	3.70814e-14	0.45841	1.61965e-07	2.61965e-10	0	NA	7.8667e-08	0	0.000433017	0.539002	0.473059	1.76582e-05	0.955815	1.80434e-07	6.796e-05	0.00680915	0.00947385	0	1.92992e-05	0	7.99361e-15	1.98686e-11	9.92764e-05	0.136604	0	2.22045e-16	8.20979e-06	0.505493	0.0963034	0.192717	0.249146	8.88178e-16	7.30315e-08	0.0916144	0.262782
SMEL_001g150880.1	0.00185043	0.333117	1.53016e-07	0.570928	0.446564	0.465768	1.28791e-05	0.0144014	0.133952	0.0263733	0.00321922	0.965585	0.845186	0.279657	5.12118e-05	0.607791	0.00889063	3.75382e-07	2.95186e-12	7.8667e-08	NA	1.30418e-06	0.0284747	0.917924	0.193327	0.0155398	0.863459	0.372348	4.26727e-07	0.253021	0.560133	7.31601e-08	0.179414	1.49418e-06	0.000293942	1.96767e-06	0.0225023	0.87451	3.17816e-06	4.4624e-07	1.08081e-05	0.929357	0.733215	0.841068	0.0589786	1.10724e-06	8.81014e-05	0.224522	0.896076
SMEL_005g228550.1	9.9759e-06	0.23814	0	0.693937	0.296724	0.707661	7.03522e-11	0.00033604	6.54206e-07	0.0293385	0.601563	0.876534	0.749731	0.0605724	1.55431e-14	0.148313	1.16302e-05	2.27782e-11	0	0	1.30418e-06	NA	0.00510878	0.744643	0.963318	1.03995e-07	0.93498	9.14437e-09	0.000335189	0.00527679	0.0117003	0	9.706e-05	0	3.33067e-15	2.14189e-11	2.00765e-05	0.213333	0	0	4.00915e-06	0.398863	0.563047	0.298687	0.267809	0	1.04584e-08	0.135948	0.361634
SMEL_011g362280.1	6.67215e-07	0.19676	0.00376091	0.0802506	0.922152	0.340785	0.691024	0.176343	0.00990681	0.0389775	0.197472	0.310211	0.00170557	0.0756475	0.0239082	0.0371843	0.124867	0.0107071	0.000852284	0.000433017	0.0284747	0.00510878	NA	0.248201	0.0392181	0.395165	0.743035	0.0275807	0.0015076	0.0445679	0.441013	0.00225646	0.185724	0.0140542	0.000399682	0.000437856	0.606605	5.26927e-05	0.0104763	0.0266994	0.00581323	0.826079	0.00429394	0.00445357	2.09623e-06	0.287504	0.0524869	0.0165511	0.492837
SMEL_010g360640.1	0.507875	0.437426	0.879157	0.0361614	0.307269	0.0127723	0.198354	0.713731	0.806445	0.0870674	0.301553	0.339115	0.0368231	0.137449	0.813904	0.0526937	0.885578	0.0517839	0.937152	0.539002	0.917924	0.744643	0.248201	NA	0.34167	0.740238	0.294209	0.73462	0.439132	0.00547266	0.939192	0.877242	0.167647	0.790962	0.952262	0.620951	0.646243	0.743856	0.51538	0.857164	0.115479	0.747634	0.0011752	0.953292	0.683161	0.902951	0.203286	0.338929	0.330325
SMEL_010g351040.1	0.0178663	0.106381	0.851974	0.403023	0.993543	0.0567508	0.164797	0.0138866	0.582831	0.0757328	0.209699	0.0360926	0.0075216	0.269643	0.324708	0.00090678	0.0755237	0.582182	0.61143	0.473059	0.193327	0.963318	0.0392181	0.34167	NA	0.401922	0.127186	0.706573	0.0321897	0.0278353	0.473626	0.368034	0.279909	0.253478	0.346531	0.0789217	0.310883	0.0786132	0.349412	0.636672	0.185356	0.114359	4.51536e-05	0.731478	0.117775	0.238332	0.84275	0.393345	0.0941857
SMEL_006g267290.1	0.491781	0.0373185	7.08045e-06	0.235138	0.732403	0.0959414	2.43234e-05	0.00363563	0.0207861	0.751129	0.26963	0.0281332	0.954526	0.0254572	0.000599027	0.250566	0.341747	0.0417042	0.002438	1.76582e-05	0.0155398	1.03995e-07	0.395165	0.740238	0.401922	NA	0.495576	1.60851e-06	0.901295	0.317795	0.0386672	6.04841e-06	0.00998483	9.238e-06	7.28718e-07	0.00448343	0.187504	0.313913	7.14994e-06	5.53943e-05	0.0102927	0.44348	0.457731	0.21755	0.494093	0.00139157	0.000924607	0.456629	0.342659
SMEL_007g282260.1	0.625549	0.828118	0.722697	0.24114	0.0586764	0.100866	0.0750198	0.00407794	0.958112	0.826031	0.303136	0.40755	0.372775	0.627602	0.630437	0.0774118	0.929706	0.754955	0.588597	0.955815	0.863459	0.93498	0.743035	0.294209	0.127186	0.495576	NA	0.892744	0.456948	0.393197	0.0403522	0.911262	0.236068	0.990961	0.951222	0.827607	0.881924	0.943104	0.281171	0.708276	0.944539	0.071113	0.374339	0.433937	0.294033	0.0492483	0.521884	0.833267	0.0303216
SMEL_009g333060.1	0.0382214	0.711171	5.34061e-06	0.82013	0.29207	0.0904151	0.00101169	0.135472	5.15108e-05	0.895066	0.963572	0.876401	0.164658	0.230037	6.13869e-06	0.374962	0.0087445	0.00400766	0.00163932	1.80434e-07	0.372348	9.14437e-09	0.0275807	0.73462	0.706573	1.60851e-06	0.892744	NA	0.727106	0.546964	0.269166	2.83693e-06	0.0039531	5.14445e-07	1.52494e-08	0.0347143	0.0724678	0.235531	4.29022e-06	4.89654e-06	0.000945955	0.913394	0.639193	0.773885	0.0909194	0.000671574	0.00161569	0.179887	0.94057
SMEL_004g219260.1	9.56487e-05	0.513509	0.000251332	0.535517	0.709625	0.678558	0.195763	0.632459	0.278754	0.000404294	0.00166259	0.233539	0.241773	0.20456	0.0739078	0.0570189	0.0244692	1.37629e-06	9.93195e-07	6.796e-05	4.26727e-07	0.000335189	0.0015076	0.439132	0.0321897	0.901295	0.456948	0.727106	NA	0.00889836	0.648746	9.94301e-05	0.665457	0.00512094	0.0185416	1.35177e-05	0.00329785	0.0435238	0.000565479	0.00137698	0.0130355	0.366058	0.00308531	0.00524757	0.0122827	0.04552	0.00720089	0.358345	0.0500923
SMEL_006g262400.1	0.00221041	0.13782	0.00336253	0.117399	0.59162	0.688845	0.157544	0.039813	0.0357011	0.159211	0.185915	0.553568	3.42656e-05	0.502517	0.121517	0.000821538	0.0022377	0.000825055	0.019019	0.00680915	0.253021	0.00527679	0.0445679	0.00547266	0.0278353	0.317795	0.393197	0.546964	0.00889836	NA	0.0999656	0.00838831	0.0852919	0.0642709	0.230636	0.00085174	0.0470138	0.126075	0.000733933	0.0325301	0.652767	0.755343	1.62326e-07	0.707706	0.513092	0.313498	0.0940388	0.470972	0.00343343
SMEL_007g277290.1	0.0590625	0.0632274	0.0292105	0.448851	0.0368754	0.0743745	0.0996527	0.491687	0.340626	0.873777	0.556004	0.00104892	0.506549	0.66643	0.841886	0.105106	0.262773	0.0708406	0.024109	0.00947385	0.560133	0.0117003	0.441013	0.939192	0.473626	0.0386672	0.0403522	0.269166	0.648746	0.0999656	NA	0.0260798	0.0911185	1.62435e-05	0.759457	0.225248	0.144399	0.617806	7.15274e-07	0.822566	0.242395	0.875658	0.0197554	0.00865209	2.55774e-10	0.497535	0.683454	0.015673	0.000301809
SMEL_007g277310.1	3.78339e-06	0.571186	0	0.927235	0.740857	0.680215	1.01514e-10	0.0228246	4.01927e-06	0.0238829	0.340354	0.526298	0.517051	0.0413006	1.17684e-14	0.325507	8.42909e-05	4.88498e-15	2.88658e-15	0	7.31601e-08	0	0.00225646	0.877242	0.368034	6.04841e-06	0.911262	2.83693e-06	9.94301e-05	0.00838831	0.0260798	NA	0.00651308	0	1.00879e-11	1.74195e-08	0.000337849	0.114848	0	0	1.33496e-07	0.561243	0.71458	0.878446	0.179505	1.77636e-15	1.90823e-06	0.253751	0.136128
SMEL_009g330200.1	0.0463642	0.183942	1.10469e-06	0.368305	0.789522	0.316526	0.0178284	0.591656	0.00276958	0.507158	0.807099	0.708733	0.360049	0.43847	0.00880797	0.518552	6.63298e-05	0.0863986	0.000269921	1.92992e-05	0.179414	9.706e-05	0.185724	0.167647	0.279909	0.00998483	0.236068	0.0039531	0.665457	0.0852919	0.0911185	0.00651308	NA	0.00882745	0.000224593	0.00141254	0.0281692	0.0378344	0.000778917	0.0144395	0.00264088	0.121784	0.191966	0.0416708	0.393734	0.00011015	0.00534447	0.07152	0.349691
SMEL_012g382160.1	0.0154367	0.365453	2.22045e-16	0.607044	0.653784	0.373228	9.53999e-10	0.00742853	3.15958e-06	0.00630079	0.217846	0.958825	0.791696	0.32607	6.63026e-09	0.0357039	0.000192409	1.66619e-08	4.44089e-16	0	1.49418e-06	0	0.0140542	0.790962	0.253478	9.238e-06	0.990961	5.14445e-07	0.00512094	0.0642709	1.62435e-05	0	0.00882745	NA	6.30113e-08	3.0235e-07	0.000343978	0.724571	0	1.08207e-08	0.000134626	0.795457	0.247126	0.10439	0.981065	4.59283e-09	1.19382e-05	0.604229	0.607516
SMEL_000g085440.1	9.03177e-06	0.875182	4.32294e-11	0.463629	0.318092	0.686333	2.92176e-06	0.028097	2.61452e-08	0.152719	0.401532	0.178097	0.77937	0.107944	1.75862e-11	0.593875	0.000750506	6.10255e-05	3.06466e-08	7.99361e-15	0.000293942	3.33067e-15	0.000399682	0.952262	0.346531	7.28718e-07	0.951222	1.52494e-08	0.0185416	0.230636	0.759457	1.00879e-11	0.000224593	6.30113e-08	NA	5.97502e-08	0.00222711	0.051057	3.52743e-09	8.88911e-12	9.33635e-08	0.519205	0.820488	0.577337	0.00182402	2.02317e-09	6.87878e-06	0.00234874	0.856518
SMEL_007g279110.1	1.54699e-05	0.132089	1.48193e-12	0.640461	0.265371	0.979388	2.57072e-05	0.135723	0.00234698	0.0033969	0.0275377	0.23034	0.279881	0.808834	3.31338e-06	0.825185	0.00132942	2.40201e-07	3.1688e-12	1.98686e-11	1.96767e-06	2.14189e-11	0.000437856	0.620951	0.0789217	0.00448343	0.827607	0.0347143	1.35177e-05	0.00085174	0.225248	1.74195e-08	0.00141254	3.0235e-07	5.97502e-08	NA	0.00306814	0.106137	1.49864e-08	5.49869e-08	0.00113788	0.188913	0.0206557	0.182083	0.0934781	7.31509e-09	0.000315893	0.156308	0.379739
SMEL_003g198560.1	0.0992742	0.0238337	6.82616e-05	0.253224	0.774057	0.593763	0.00584334	0.0416517	0.0399601	0.0135289	0.250309	0.479173	0.998748	0.324571	0.000386043	0.381141	0.00189192	0.00384273	3.57345e-05	9.92764e-05	0.0225023	2.00765e-05	0.606605	0.646243	0.310883	0.187504	0.881924	0.0724678	0.00329785	0.0470138	0.144399	0.000337849	0.0281692	0.000343978	0.00222711	0.00306814	NA	0.756162	0.000389544	0.000416476	0.0105016	0.407206	0.0543265	0.598461	0.957187	0.0279832	0.00330277	0.197823	0.0123237
SMEL_006g259800.1	0.0114082	0.859045	0.179421	0.692076	0.342594	0.174623	0.55918	0.735534	0.0518838	0.567686	0.783735	0.837555	0.0140419	0.0136077	0.81526	0.0111863	0.0965506	0.338576	0.409812	0.136604	0.87451	0.213333	5.26927e-05	0.743856	0.0786132	0.313913	0.943104	0.235531	0.0435238	0.126075	0.617806	0.114848	0.0378344	0.724571	0.051057	0.106137	0.756162	NA	0.0576394	0.330153	0.664969	0.645182	0.335986	0.0239581	0.0547012	0.852229	0.865926	0.75322	0.250544
SMEL_006g265210.1	0.00133182	0.180907	0	0.458629	0.785237	0.173191	6.91965e-10	0.130076	2.92852e-06	0.0703974	0.29344	0.475055	0.377155	0.123695	1.3592e-09	0.360661	4.3595e-05	5.07594e-13	5.84865e-13	0	3.17816e-06	0	0.0104763	0.51538	0.349412	7.14994e-06	0.281171	4.29022e-06	0.000565479	0.000733933	7.15274e-07	0	0.000778917	0	3.52743e-09	1.49864e-08	0.000389544	0.0576394	NA	1.13648e-09	2.44242e-05	0.872868	0.117026	0.778444	0.607082	9.68903e-10	0.00010757	0.841742	0.0178109
SMEL_007g292070.1	2.63653e-08	0.614757	5.59552e-14	0.523479	0.270003	0.536121	4.16801e-08	0.00153295	1.57084e-05	0.0075141	0.528621	0.18567	0.612379	0.0491585	4.88498e-15	0.240349	0.00079184	3.79723e-06	2.77156e-12	2.22045e-16	4.4624e-07	0	0.0266994	0.857164	0.636672	5.53943e-05	0.708276	4.89654e-06	0.00137698	0.0325301	0.822566	0	0.0144395	1.08207e-08	8.88911e-12	5.49869e-08	0.000416476	0.330153	1.13648e-09	NA	3.14618e-05	0.988791	0.530321	0.877114	0.00182893	4.68514e-14	3.37604e-06	0.066023	0.965286
SMEL_003g180460.1	0.00663779	0.594807	1.77035e-08	0.418038	0.235919	0.995148	0.000126976	0.570577	0.00717066	0.687966	0.545738	0.192791	0.557014	0.151904	3.62355e-05	0.910809	0.00284996	2.80017e-07	4.49466e-06	8.20979e-06	1.08081e-05	4.00915e-06	0.00581323	0.115479	0.185356	0.0102927	0.944539	0.000945955	0.0130355	0.652767	0.242395	1.33496e-07	0.00264088	0.000134626	9.33635e-08	0.00113788	0.0105016	0.664969	2.44242e-05	3.14618e-05	NA	0.394875	0.519163	0.0886805	0.000456958	0.000427039	7.77844e-06	0.0281395	0.401411
SMEL_001g129900.1	0.562989	0.97569	0.148257	0.207224	0.38372	0.510839	0.0795726	0.0645336	0.434743	0.142235	0.601045	0.784895	0.69798	0.364502	0.435202	0.0972255	0.880789	0.662309	0.487385	0.505493	0.929357	0.398863	0.826079	0.747634	0.114359	0.44348	0.071113	0.913394	0.366058	0.755343	0.875658	0.561243	0.121784	0.795457	0.519205	0.188913	0.407206	0.645182	0.872868	0.988791	0.394875	NA	0.0655381	0.138955	0.24688	0.0087232	0.519198	0.372382	0.728867
SMEL_001g139740.1	0.175625	0.0491767	0.244602	0.00550486	0.630043	0.14327	0.93615	0.00248699	0.618381	0.00376486	0.0286126	0.626492	6.02518e-06	0.81977	0.21166	2.87953e-06	0.00261311	0.0155735	0.103173	0.0963034	0.733215	0.563047	0.00429394	0.0011752	4.51536e-05	0.457731	0.374339	0.639193	0.00308531	1.62326e-07	0.0197554	0.71458	0.191966	0.247126	0.820488	0.0206557	0.0543265	0.335986	0.117026	0.530321	0.519163	0.0655381	NA	0.552148	0.269408	0.123839	0.658099	0.930635	2.52721e-05
SMEL_001g123620.1	0.0445929	0.046054	0.169129	0.923587	0.901819	0.61778	0.0030711	0.0315926	0.563716	0.246819	0.513105	0.34435	0.345923	0.264371	0.651547	0.0495854	0.391623	0.779994	0.308567	0.192717	0.841068	0.298687	0.00445357	0.953292	0.731478	0.21755	0.433937	0.773885	0.00524757	0.707706	0.00865209	0.878446	0.0416708	0.10439	0.577337	0.182083	0.598461	0.0239581	0.778444	0.877114	0.0886805	0.138955	0.552148	NA	2.61936e-05	0.0397359	0.529293	0.714254	0.362373
SMEL_003g177010.1	2.05669e-07	0.0200987	0.335379	0.214657	0.018914	0.514665	0.953058	0.984484	0.184437	0.406425	0.893651	0.00279985	0.55786	0.450539	0.100856	0.291041	0.454612	0.455359	0.217975	0.249146	0.0589786	0.267809	2.09623e-06	0.683161	0.117775	0.494093	0.294033	0.0909194	0.0122827	0.513092	2.55774e-10	0.179505	0.393734	0.981065	0.00182402	0.0934781	0.957187	0.0547012	0.607082	0.00182893	0.000456958	0.24688	0.269408	2.61936e-05	NA	0.394473	0.101661	0.00231973	8.57604e-05
SMEL_003g180470.1	0.00025456	0.695397	0	0.984137	0.285573	0.701336	2.92344e-12	6.98643e-05	3.28373e-05	0.0856986	0.503315	0.200751	0.262699	0.262719	1.9984e-15	0.000959488	0.00770176	6.0485e-07	2.51221e-12	8.88178e-16	1.10724e-06	0	0.287504	0.902951	0.238332	0.00139157	0.0492483	0.000671574	0.04552	0.313498	0.497535	1.77636e-15	0.00011015	4.59283e-09	2.02317e-09	7.31509e-09	0.0279832	0.852229	9.68903e-10	4.68514e-14	0.000427039	0.0087232	0.123839	0.0397359	0.394473	NA	5.43749e-05	0.421907	0.396533
SMEL_000g109110.1	0.000801352	0.739678	3.024e-07	0.331882	0.508513	0.0797673	5.9015e-05	0.0472682	0.0240144	0.0107823	0.707611	0.832024	0.588032	0.651776	4.59254e-06	0.451593	0.000243687	1.73022e-05	4.11997e-07	7.30315e-08	8.81014e-05	1.04584e-08	0.0524869	0.203286	0.84275	0.000924607	0.521884	0.00161569	0.00720089	0.0940388	0.683454	1.90823e-06	0.00534447	1.19382e-05	6.87878e-06	0.000315893	0.00330277	0.865926	0.00010757	3.37604e-06	7.77844e-06	0.519198	0.658099	0.529293	0.101661	5.43749e-05	NA	0.0156087	0.549812
SMEL_003g196100.1	0.014687	0.54343	0.239646	0.46415	0.185453	0.0830883	0.870408	0.29335	0.00858668	0.0829829	0.368758	0.354378	0.73119	0.636438	0.00912034	0.175635	0.0202803	0.770254	0.159595	0.0916144	0.224522	0.135948	0.0165511	0.338929	0.393345	0.456629	0.833267	0.179887	0.358345	0.470972	0.015673	0.253751	0.07152	0.604229	0.00234874	0.156308	0.197823	0.75322	0.841742	0.066023	0.0281395	0.372382	0.930635	0.714254	0.00231973	0.421907	0.0156087	NA	0.151002
SMEL_004g216950.1	0.59837	0.0195341	0.182028	0.200798	0.0386158	0.26103	0.392178	0.241959	0.744406	0.215728	0.351565	0.038413	0.112802	0.227016	0.761621	0.000819216	0.0369346	0.00816554	0.715526	0.262782	0.896076	0.361634	0.492837	0.330325	0.0941857	0.342659	0.0303216	0.94057	0.0500923	0.00343343	0.000301809	0.136128	0.349691	0.607516	0.856518	0.379739	0.0123237	0.250544	0.0178109	0.965286	0.401411	0.728867	2.52721e-05	0.362373	8.57604e-05	0.396533	0.549812	0.151002	NA
SMEL_010g341280.1	0.565884	0.283798	0.403486	0.0987069	0.835127	0.331526	0.490776	0.183741	0.649229	0.704641	0.0935148	0.739059	0.362345	0.059151	0.997782	0.00447301	0.670787	0.448201	0.648904	0.949419	0.528212	0.772515	0.873127	0.819553	0.177314	0.90081	0.00637141	0.50145	0.22971	0.56243	0.811083	0.927109	0.659206	0.458052	0.620687	0.962706	0.0992936	0.880347	0.532302	0.633147	0.0552093	0.126378	0.674743	0.0333823	0.706218	0.189266	0.715172	0.954673	0.161244
SMEL_006g268370.1	0.00097577	0.221094	4.29791e-10	0.733855	0.10587	0.168325	1.95316e-06	0.0410163	0.000279286	0.00701327	0.0508196	0.178375	0.749854	0.587148	5.54066e-09	0.223167	0.0285503	2.03443e-07	4.63982e-10	3.59173e-11	1.21529e-08	5.27578e-12	0.0377845	0.425094	0.521153	0.0014246	0.287045	0.0019583	0.000122069	0.0905332	0.726206	9.58551e-11	0.188728	9.29242e-09	6.75585e-09	1.63357e-09	0.00186103	0.87161	8.06076e-08	3.21121e-12	2.17381e-05	0.862663	0.886302	0.980365	0.0292325	2.39356e-10	3.0084e-05	0.231863	0.671131
SMEL_012g395700.1	0.0524898	0.342937	0.00208851	0.0438955	0.0518519	0.216302	0.0125827	0.00290161	0.000363689	0.323741	0.424343	0.457376	0.222029	0.747628	0.000180143	0.206438	0.333321	0.00838255	0.0595771	0.010465	0.0289773	0.00033323	0.983305	0.348275	0.0199502	0.00476113	0.616666	0.0321441	0.709365	0.998716	0.813507	2.86727e-05	0.832669	0.0023345	5.9182e-05	0.101106	0.652397	0.135673	0.000352944	0.000345266	0.00261001	0.809224	0.000386842	0.101074	0.142707	0.00137667	0.0249817	0.591707	0.335802
SMEL_003g195970.1	0.00409309	0.848198	3.86073e-08	0.356481	0.1644	0.908696	2.67325e-07	8.65889e-05	0.000175026	0.841367	0.341036	0.896709	0.00863664	0.293392	3.14376e-09	0.00622466	0.0501304	0.000945622	0.000600335	4.04017e-06	0.00354047	5.59149e-09	0.863119	0.655992	0.105404	0.00146648	0.153137	0.0353063	0.454595	0.381915	0.757144	3.84599e-09	0.0451327	2.13153e-05	2.02346e-06	0.000126077	0.00399362	0.552469	1.01825e-06	2.58671e-10	0.000531282	0.306181	0.00661163	0.682367	0.325214	2.85335e-10	0.00591147	0.466009	0.769756
SMEL_000g036450.1	7.53348e-10	0.597475	2.04819e-10	0.385136	0.121818	0.522472	9.37951e-05	0.228618	0.00271709	0.00512474	0.0264561	0.0975062	0.0716157	0.382867	2.87334e-07	0.51511	0.00030138	1.66369e-07	6.09112e-10	5.17653e-12	3.00067e-08	1.25341e-09	7.23833e-08	0.92157	0.120502	0.0492544	0.772176	7.89584e-05	7.9422e-06	0.0938157	0.0832444	5.06416e-09	0.0412617	8.68974e-06	1.10127e-08	6.80356e-08	0.0370427	0.1512	3.56345e-05	4.61919e-12	2.09836e-08	0.907403	0.521951	0.58604	2.97835e-09	1.2615e-07	1.28583e-05	0.00746573	0.128915
SMEL_000g017060.1	0.412512	0.280996	0.196495	0.731318	0.0577911	0.379617	0.444408	0.422978	0.334173	0.568331	0.88545	0.317431	0.895656	0.411042	0.597355	0.0188923	0.873499	0.641669	0.0947314	0.219045	0.916195	0.438622	0.133537	0.173298	0.0695177	0.211727	0.89286	0.211681	0.216272	0.0178313	0.336781	0.230263	0.100839	0.0167844	0.437908	0.850974	0.982299	0.758167	0.283335	0.64022	0.0727773	0.373759	0.463004	0.185541	0.974712	0.280287	0.528878	0.594506	0.101313
SMEL_000g078070.1	8.32483e-06	0.368963	0.379099	0.821325	0.345667	0.181695	0.639637	0.63129	0.555064	0.52965	0.338145	0.0224988	0.70624	0.184043	0.116447	0.424322	0.906612	0.484321	0.114752	0.231503	0.170282	0.509541	0.0103752	0.14645	0.876319	0.701343	0.330539	0.628063	0.344953	0.605765	0.00078575	0.464732	0.329316	0.452251	0.0248617	0.0430458	0.0647862	0.089548	0.613291	0.0411798	0.70163	0.0722414	0.0603163	0.820839	3.1845e-05	0.021846	0.700581	0.174473	0.00038335
SMEL_001g151160.1	7.64411e-09	0.788542	2.68674e-14	0.627207	0.132501	0.732088	2.93448e-05	0.0346393	8.3033e-05	0.0115361	0.180844	0.0444517	0.0848969	0.0910804	2.61847e-08	0.942974	0.000548322	2.08025e-07	1.05027e-13	1.34781e-13	4.10876e-10	7.90923e-13	5.28517e-05	0.872244	0.423613	0.00838191	0.17052	0.000332828	1.26815e-08	0.0470303	0.343362	1.45217e-13	0.00538386	1.611e-06	1.64555e-11	5.78455e-09	0.00617581	0.0262983	3.74136e-07	1.82299e-13	2.51001e-06	0.347548	0.820451	0.197321	3.42375e-05	1.19269e-11	0.000115435	0.0214921	0.766493
SMEL_007g294680.1	0.111292	0.580643	0.0243042	0.999981	0.767024	0.915216	0.0748261	0.0642976	0.0910208	0.666942	0.498405	0.00484707	0.597905	0.173825	0.00383543	0.745215	0.0617653	0.197104	0.117017	0.0441777	0.0429084	0.0309828	0.683366	0.720996	0.151749	0.0855208	0.290917	0.374936	0.515447	0.0477724	0.654148	0.0713269	0.153816	0.197708	0.0674011	0.184232	0.515671	0.860933	0.11184	0.0736904	0.50205	0.197371	0.901108	0.0763406	0.747467	0.063307	0.157113	0.140925	0.264219
SMEL_000g085330.1	0.0140811	0.666347	1.37415e-07	0.895534	0.0589513	0.526663	1.64173e-05	0.00785479	0.000270017	0.284908	0.720095	0.735383	0.686757	0.158721	1.11015e-08	0.450412	0.00597642	2.03069e-09	4.59941e-06	1.98542e-06	0.000132178	1.40357e-08	0.096142	0.934862	0.0906858	8.59969e-05	0.311993	5.53905e-05	0.0398476	0.197889	0.974279	1.64649e-09	0.00883305	2.82522e-06	1.09333e-08	3.16951e-05	0.00488471	0.724784	1.61205e-06	4.20245e-06	1.11181e-05	0.798006	0.569094	0.85824	0.155282	4.68182e-07	8.94003e-06	0.0164205	0.496112
SMEL_001g152910.1	0.0141139	0.385213	9.83351e-11	0.819712	0.908469	0.128392	3.8024e-06	0.0333534	2.9618e-05	0.251301	0.841452	0.876727	0.590384	0.557534	1.88967e-08	0.00735393	0.0420484	1.11414e-05	1.36957e-09	1.28777e-09	2.04341e-06	1.54912e-11	0.0738584	0.716904	0.154248	0.000720563	0.869911	8.13477e-05	0.00962083	0.209741	0.0297333	1.89564e-11	0.0013549	3.44585e-09	1.98689e-06	1.02935e-05	2.24457e-05	0.252753	2.12514e-11	1.48045e-08	1.32773e-05	0.686986	0.353163	0.586077	0.418348	3.99226e-08	0.000268847	0.576814	0.647652
SMEL_000g089310.1	0.388279	0.794612	0.0158839	0.264985	0.821079	0.367643	0.00462249	0.00348437	0.958428	0.678016	0.0981969	0.225908	0.453899	0.192817	0.0359862	0.0276317	0.264986	0.0453245	0.114371	0.0705083	0.139444	0.0161781	0.504023	0.823581	0.000485898	0.210005	0.0243363	0.0954766	0.353748	0.21544	0.928035	0.00690295	0.283782	0.0111968	0.234666	0.884231	0.291596	0.178144	0.0640632	0.0428661	0.453663	0.188757	0.0613279	0.398876	0.457223	0.00213874	0.117887	0.301283	0.3059
SMEL_008g312130.1	0.00329943	0.20595	0.20547	0.864108	0.126443	0.936977	0.482851	0.790436	0.423784	0.598545	0.569725	0.0199053	0.822565	0.515264	0.0330213	0.357781	0.693906	0.314075	0.10945	0.156917	0.128171	0.0968755	0.00100474	0.83403	0.755272	0.800949	0.0319347	0.603103	0.00213227	0.64382	0.00182931	0.0671966	0.155556	0.93411	0.0123819	0.185586	0.54488	0.0685724	0.759612	0.0479791	0.0149341	0.411807	0.492044	0.000646283	3.02017e-07	0.0753478	0.00315283	0.0698416	0.077279
SMEL_000g067190.1	0.064264	0.291036	0.18049	0.567428	0.00380321	0.689493	0.0873066	0.0676125	0.475186	0.475687	0.658438	0.893199	0.425018	0.66744	0.0646323	0.0287583	0.484115	0.165039	0.526781	0.0479252	0.985276	0.011441	0.91755	0.113981	0.00261069	0.0264139	0.73808	0.00556734	0.0571793	0.188462	0.321698	0.0804835	0.661046	0.517998	0.0207255	0.105942	0.0410487	0.955588	0.404336	0.00120436	0.411628	0.0203839	0.169816	0.79633	0.16532	0.249961	0.0444696	0.438984	0.140001
SMEL_003g189340.1	0.00939472	0.588374	0.158504	0.42606	0.97754	0.393082	0.366106	0.000246793	0.0411563	0.0736285	0.2067	0.462773	9.30991e-06	0.831089	0.61493	3.20265e-08	0.00267607	0.0729631	0.318464	0.0193814	0.596184	0.190659	6.09468e-05	0.067112	6.76563e-07	0.770628	0.00492411	0.025978	0.0106411	2.39305e-05	0.101304	0.194452	0.196346	0.156102	0.0701241	0.108768	0.310168	0.000121212	0.0152352	0.680938	0.542773	0.00889791	4.21402e-08	0.0810423	0.250407	0.117254	0.750784	0.347115	0.00299939
SMEL_003g196890.1	2.75884e-08	0.553423	5.88914e-05	0.164747	0.267571	0.301956	0.117056	0.224086	0.00424992	0.0212946	0.597071	0.00497912	0.314402	0.0124719	0.000128615	0.4881	0.00435938	0.00465041	3.12439e-05	1.71229e-06	0.0496875	5.80811e-06	0.00213525	0.86428	0.220726	0.139547	0.0895794	0.0254578	2.65919e-05	0.125953	0.0700044	2.47149e-06	0.0419905	0.0115615	6.87367e-07	0.000217464	0.0385672	0.012319	0.00248507	9.22572e-08	0.0118588	0.935826	0.416872	0.0302162	5.91519e-05	0.000266902	0.05563	0.0507223	0.911246
SMEL_001g151200.1	0.946025	0.807765	0.00118143	0.429107	0.660514	0.618338	1.39274e-05	0.000152194	0.00612217	0.0823187	0.380675	0.203793	0.00151099	0.198437	2.42217e-06	8.44648e-09	0.228121	0.337931	0.0057587	0.0103691	0.0175791	0.000370537	0.6152	0.362465	4.79799e-09	0.000186365	0.211217	0.0407039	0.232233	0.190517	0.258189	0.00023768	0.187627	0.00114925	0.00173352	0.123582	0.819148	0.490992	0.0012884	0.00381473	0.0257845	0.000251987	3.28511e-06	0.324434	0.434655	3.97189e-07	0.0272207	0.947628	0.0487227
SMEL_003g178610.1	0.00473526	0.214257	0.117478	0.341517	0.365526	0.084812	0.466314	0.365098	0.380206	0.445475	0.961103	0.436433	0.239377	0.023595	0.357699	0.325262	0.398798	0.0517117	0.0586044	0.00473746	0.0679354	0.0334815	0.0190003	0.313728	0.193346	0.37568	0.117289	0.684911	0.0049501	0.000202761	0.00209829	0.0108708	0.603646	0.124412	0.172404	0.00698218	0.42301	0.00252723	0.000190539	0.00745824	0.830873	0.601027	0.0213383	0.271384	0.938182	0.526007	0.693134	0.403858	0.00819447
SMEL_008g307820.1	3.59198e-09	0.530499	0	0.850449	0.182624	0.52292	9.98415e-11	0.017635	3.15104e-06	0.00139949	0.0553526	0.0853365	0.393929	0.460042	9.32587e-15	0.481404	3.85938e-06	8.07798e-13	0	0	3.05707e-11	0	0.000419542	0.708653	0.743079	0.00220905	0.499206	0.000107672	1.65378e-06	0.00310728	0.39992	0	0.000254517	3.19744e-14	6.48592e-13	4.66294e-14	0.000224617	0.174345	2.88658e-15	0	2.29991e-08	0.67647	0.400345	0.605334	0.0079476	0	2.85871e-08	0.0396467	0.981582
SMEL_001g124710.1	0.277308	0.73588	0.357398	0.315865	0.273666	0.0294787	0.85898	0.157578	0.0805617	0.184423	0.143296	0.727833	0.0351581	0.584703	0.139984	0.273864	0.605203	0.894167	0.553611	0.637064	0.934541	0.12151	0.51768	0.0194648	0.33143	0.148414	0.578441	0.703819	0.655429	0.887427	0.757846	0.133638	0.720614	0.862337	0.095413	0.849307	0.498018	0.406426	0.0938748	0.126212	0.271647	0.361782	0.0158517	0.00691712	0.876189	0.105896	0.290017	0.690781	0.28589
SMEL_005g227630.1	1.42916e-06	0.307341	0	0.955691	0.394247	0.539002	8.72902e-12	0.00110162	2.11889e-07	0.0273846	0.175132	0.147888	0.619566	0.431002	0	0.0206182	0.00214116	5.34531e-07	8.43769e-15	0	2.7186e-08	0	0.00326644	0.802129	0.781741	3.73318e-05	0.57631	7.90795e-06	0.00354833	0.080221	0.642857	0	0.000946106	7.16982e-13	4.44089e-15	1.92982e-10	0.00178759	0.289258	7.56506e-13	0	8.37098e-06	0.281977	0.353089	0.594128	0.0105755	0	1.1676e-06	0.0934104	0.334313
SMEL_005g239330.1	0.618936	0.349232	2.01787e-08	0.643082	0.640115	0.0183664	3.3458e-07	0.0633227	0.00423949	0.0149649	0.594019	0.228809	0.991734	0.427584	0.000184024	0.188967	0.000625294	1.42556e-07	8.52103e-08	5.50721e-09	0.00115839	2.06688e-09	0.794254	0.124995	0.320585	0.00610683	0.961446	0.0318396	0.00118456	0.00604216	3.53814e-07	7.06282e-09	0.0636089	3.75171e-10	0.000751369	7.73138e-07	6.8755e-05	0.406545	2.57794e-13	0.000649083	0.0552145	0.284785	0.107519	0.101294	0.026928	7.67079e-06	0.00059773	0.476256	0.0048168
SMEL_000g004730.1	8.45358e-08	0.333645	0	0.848631	0.363716	0.786091	1.40128e-11	0.00716844	1.99825e-07	0.00129643	0.115085	0.233144	0.49145	0.339245	0	0.263323	1.99541e-06	5.52491e-12	0	0	1.47487e-09	0	0.000141378	0.870823	0.806673	1.55477e-05	0.747128	1.23456e-07	7.51124e-05	0.015237	0.287925	0	0.000134236	0	0	8.96172e-13	4.17164e-05	0.170155	0	0	3.88474e-09	0.640878	0.575022	0.493824	0.00788285	0	1.81596e-09	0.028805	0.893713
SMEL_001g122190.1	0.00144697	0.442195	0.107534	0.971973	0.128758	0.92822	0.101874	0.96246	0.203961	0.809189	0.056197	0.00608142	0.383616	0.832001	0.0980524	0.133645	0.0746777	0.808539	0.056732	0.0352157	0.200972	0.204962	0.00384267	0.365515	0.404584	0.720776	0.000674204	0.278157	0.680602	0.709791	0.026561	0.26913	0.248095	0.317164	0.0503509	0.0236311	0.221791	0.257969	0.62237	0.0375265	0.141295	0.321519	0.822878	0.965329	8.66186e-05	0.026198	0.717258	0.0557928	0.000130324
SMEL_005g228290.1	0.0566733	0.00206897	0.00728398	0.191347	0.0108038	0.196483	0.036717	0.824006	0.0715311	0.336668	0.641742	0.0145971	0.299305	0.704987	0.336911	0.322321	0.0219494	0.0631526	0.0228538	0.00267243	0.939498	0.00765056	0.272716	0.354135	0.929379	0.030259	0.0502173	0.15174	0.892172	0.00354915	0	0.0253359	0.0144799	5.59074e-05	0.938095	0.109634	0.0491141	0.747687	6.50976e-07	0.976046	0.216253	0.644729	0.000881984	0.00111329	4.88054e-13	0.30717	0.388199	0.0342452	8.47918e-07
SMEL_005g241460.1	0.476406	0.0349997	0.00010327	0.317277	0.0349552	0.585017	0.0402899	0.772823	0.138952	0.0201999	0.0315761	0.0117645	0.226305	0.105366	0.0339004	0.716838	0.00773164	0.00309683	8.63761e-06	1.50588e-05	0.00754359	0.000143621	0.235544	0.798476	0.856153	0.00896128	0.0614248	0.102021	0.0214979	0.0074633	1.2581e-12	8.1033e-05	0.0806678	5.0451e-07	0.229967	0.00786474	0.0116297	0.171335	6.98963e-09	0.0130549	0.821141	0.45203	0.00379751	0.0955239	0.0017749	0.125718	0.187707	0.33839	0.000129085
SMEL_005g242150.1	1.11707e-06	0.0987966	0	0.68734	0.800027	0.649093	1.77156e-11	0.0473779	3.77156e-07	0.00146919	0.0704788	0.311774	0.340768	0.167354	3.70814e-14	0.45841	1.61965e-07	2.61965e-10	0	0	7.8667e-08	0	0.000433017	0.539002	0.473059	1.76582e-05	0.955815	1.80434e-07	6.796e-05	0.00680915	0.00947385	0	1.92992e-05	0	7.99361e-15	1.98686e-11	9.92764e-05	0.136604	0	2.22045e-16	8.20979e-06	0.505493	0.0963034	0.192717	0.249146	8.88178e-16	7.30315e-08	0.0916144	0.262782
SMEL_000g061420.1	0.63729	0.0253875	0.290652	0.329293	0.22528	0.591859	0.186958	0.253245	0.00366369	0.483843	0.907662	0.0569218	0.166073	0.655583	0.732592	0.816241	0.206498	0.994614	0.617922	0.130858	0.373147	0.366689	0.194998	0.733578	0.963795	0.104565	0.0023765	0.153557	0.125264	0.0439396	1.99447e-07	0.541808	0.277542	0.0194596	0.392302	0.58595	0.549404	0.0864117	0.00140285	0.362413	0.630426	0.308824	0.0772788	0.200372	0.00262563	0.460094	0.987091	0.540612	0.0200121
SMEL_001g151210.1	0.0336268	0.832186	7.86648e-05	0.937739	0.107589	0.550419	0.00136689	0.000137455	0.000252173	0.954688	0.0197013	0.248835	0.456343	0.325573	3.33239e-05	0.107197	0.427579	0.0233231	0.000254979	0.000131034	0.0363672	5.45048e-07	0.0728901	0.647998	0.200337	0.000513802	0.315801	0.0285358	0.981425	0.136519	0.109284	2.86478e-05	0.0163962	3.10822e-05	0.000336521	0.00280063	0.0141136	0.596615	0.00142626	0.000111087	0.0476024	0.28169	0.499565	0.110654	0.880215	1.65188e-05	0.000133135	0.046923	0.672865
SMEL_004g201720.1	0.00065151	0.0337971	4.48596e-07	0.33551	0.715449	0.471306	0.000924232	0.0364855	1.91666e-05	0.400876	0.34749	0.0552224	0.253224	0.285863	0.000203811	0.0023351	0.331706	0.237586	0.000332584	7.67693e-05	0.0762795	7.74595e-06	0.00637495	0.0384504	0.926572	0.00476883	0.214488	0.000951531	0.341809	0.548374	0.547695	4.65942e-06	0.00885117	0.000362888	5.81333e-07	5.37241e-05	0.281618	0.0576922	0.000871586	1.43678e-06	0.00317461	0.0189937	0.0513271	0.496425	0.0020139	8.19262e-07	0.0203907	0.455666	0.0793892
SMEL_003g197730.1	3.2171e-05	0.833246	9.93436e-10	0.538479	0.125829	0.697283	4.24256e-05	0.0908954	1.10666e-05	0.0534247	0.194003	0.788169	0.674946	0.142436	8.16751e-08	0.244833	0.00394317	0.000131335	3.98614e-12	3.58469e-12	6.0735e-07	9.47593e-10	0.0135294	0.729503	0.295774	0.00666951	0.789352	0.001784	0.00141402	0.0321211	0.0873257	8.89425e-10	0.00609088	5.76169e-09	3.15095e-05	5.91974e-06	0.0066908	0.27353	4.17388e-09	2.51927e-10	0.00146852	0.962448	0.802492	0.390263	0.0912641	3.07939e-09	0.000262755	0.0299042	0.29927
SMEL_006g260300.1	0.817778	0.436685	0.202974	0.0794781	0.547603	0.489261	0.0261075	0.000142394	0.135265	0.718452	0.439268	0.0540926	0.00969643	0.171602	0.0105703	0.000621188	0.320595	0.60741	0.0678587	0.180722	0.0452875	0.0573863	0.478828	0.0662312	0.000595346	0.202845	0.358452	0.496501	0.450207	0.061527	0.591123	0.0771858	0.403292	0.237451	0.0874334	0.51288	0.652555	0.759318	0.256921	0.0203942	0.36573	0.0368578	7.01353e-06	0.199016	0.995293	0.00497554	0.0569462	0.806124	0.430703
SMEL_010g357190.1	0.593516	0.97049	0.378108	0.485017	0.970567	0.452805	0.109082	0.180731	0.423029	0.31158	0.325921	0.436477	0.883059	0.386522	0.239377	0.0633246	0.416319	0.70355	0.773187	0.107648	0.222217	0.180252	0.0697889	0.140367	0.465951	0.877288	0.111385	0.0208853	0.0759447	0.607789	0.0243603	0.639105	0.00851056	0.484633	0.678031	0.784751	0.780276	0.157874	0.453805	0.32989	0.12527	0.319224	0.903223	0.00468221	0.00422156	0.0317852	0.980659	0.619499	0.524884
SMEL_000g091530.1	0.342506	0.001742	1.93237e-10	0.347485	0.0245958	0.312982	2.11069e-05	0.16335	0.000791422	0.0435833	0.931776	0.0974912	0.593117	0.946351	0.000476203	0.0436874	0.000535242	9.26109e-05	4.59685e-08	3.81772e-10	0.00119123	7.5586e-10	0.577368	0.72145	0.618673	4.4452e-05	0.20499	0.00253398	0.158693	0.0342979	2.13423e-10	1.76845e-08	4.76458e-05	2.03948e-12	0.000616902	2.17748e-05	0.000172745	0.943664	3.55271e-15	0.000337957	0.024682	0.276954	0.136262	0.0256221	0.0070955	6.95982e-06	0.00301894	0.586005	0.00257605
SMEL_003g199000.1	0.000749208	0.824631	2.52817e-10	0.565116	0.638086	0.574186	2.67534e-05	0.0496689	1.29496e-05	0.00344241	0.19648	0.242111	0.349248	0.135159	2.42029e-13	0.358899	0.001612	4.02377e-05	8.41598e-10	5.1088e-12	0.000416983	6.18394e-12	0.00219324	0.254441	0.953781	0.0082998	0.349386	5.51189e-05	0.076191	0.0223367	0.466116	7.55485e-12	0.010808	3.57983e-07	1.26953e-08	3.82826e-05	0.000729324	0.1771	5.64354e-09	5.44631e-12	0.000610636	0.706701	0.872467	0.884646	0.122576	1.408e-09	0.000551457	0.393262	0.504351
SMEL_007g293920.1	0.174513	0.72873	0.377908	0.88137	0.984635	0.363821	0.27235	0.476278	0.0508727	0.0485854	0.903493	0.162222	0.389944	0.766631	0.429398	0.77936	0.0334872	0.214147	0.23129	0.158099	0.757611	0.295085	0.0787055	0.803841	0.000141679	0.80394	0.992876	0.238383	0.730652	0.336535	0.977532	0.88887	0.0828488	0.832546	0.162969	0.289973	0.779647	0.25812	0.771687	0.0287869	0.605638	0.0953181	0.208799	0.969985	0.0714753	0.663715	0.945811	0.188429	0.347283
SMEL_003g178610.1	0.00473526	0.214257	0.117478	0.341517	0.365526	0.084812	0.466314	0.365098	0.380206	0.445475	0.961103	0.436433	0.239377	0.023595	0.357699	0.325262	0.398798	0.0517117	0.0586044	0.00473746	0.0679354	0.0334815	0.0190003	0.313728	0.193346	0.37568	0.117289	0.684911	0.0049501	0.000202761	0.00209829	0.0108708	0.603646	0.124412	0.172404	0.00698218	0.42301	0.00252723	0.000190539	0.00745824	0.830873	0.601027	0.0213383	0.271384	0.938182	0.526007	0.693134	0.403858	0.00819447
SMEL_009g325840.1	0.00522455	0.216434	3.54179e-11	0.197454	0.710234	0.237567	3.20249e-07	0.580148	2.46538e-06	0.0102907	0.212068	0.476696	0.670473	0.307305	4.05589e-07	0.372352	0.00181473	6.95192e-05	1.6705e-08	2.08944e-13	3.47521e-05	7.87994e-11	0.00420507	0.994693	0.791472	0.000111619	0.301674	0.00513003	0.000466223	0.00988663	0.0358298	5.98632e-12	0.000702174	2.81568e-08	9.32645e-08	4.81453e-08	0.00105671	0.018086	3.41949e-13	4.31469e-07	0.000353039	0.471439	0.29268	0.672173	0.447714	5.16012e-07	0.000870221	0.166487	0.115175
SMEL_001g141930.1	0.121236	0.275155	4.27221e-07	0.388084	0.43057	0.789786	0.000168421	0.0114444	0.0280618	0.106386	0.97047	0.663021	0.832431	0.275778	0.000935341	0.315929	0.00871266	3.207e-05	0.000244823	1.11642e-06	0.0115793	1.54855e-08	0.172651	0.352553	0.709862	0.00544688	0.32617	0.000453652	0.00366428	0.199472	0.0220797	5.89278e-06	0.00462738	1.78906e-05	1.46683e-05	0.000200439	0.0129444	0.691962	1.05527e-06	0.00058512	0.000652026	0.488344	0.242948	0.90266	0.905401	8.61487e-05	0.00019675	0.23968	0.254835
SMEL_008g301360.1	6.30888e-07	0.845518	2.4869e-14	0.75789	0.22361	0.213779	4.44851e-09	0.00618919	0.000161252	0.0242277	0.025951	0.0877901	0.989722	0.36596	1.11022e-14	0.450678	0.000410425	1.28239e-07	6.36789e-10	1.11022e-14	3.63896e-06	3.5083e-14	0.00643698	0.494784	0.623342	0.000113562	0.423029	6.21216e-07	0.0243007	0.335118	0.233235	0	0.0155748	2.14222e-09	6.72129e-13	4.23447e-07	0.00184591	0.960934	3.62212e-08	3.9968e-15	7.54496e-09	0.394089	0.540895	0.454626	0.00167673	1.99396e-13	2.30587e-07	0.0237591	0.679802
SMEL_001g120570.1	0.000132406	0.575915	0.0349643	0.948918	0.0461298	0.301813	0.453716	0.668009	0.619805	0.00728298	0.013355	0.0715333	0.0199964	0.894081	0.315243	0.000887492	0.0252766	0.00533697	0.01744	0.0659651	0.00155371	0.108035	0.00398468	0.317985	0.000948446	0.392778	0.294269	0.788939	2.36832e-05	0.0483594	3.14358e-06	0.268832	0.815756	0.815296	0.105986	0.00196186	0.0387914	0.531333	0.531142	0.00492648	0.00236336	0.497803	0.0255655	0.34087	8.80589e-07	0.131687	0.034987	0.0133266	0.487629
SMEL_005g230690.1	0.97832	0.999569	6.64264e-05	0.881616	0.531374	0.357309	0.000413209	0.0049828	0.000463871	0.532423	0.138074	0.0727083	0.051965	0.271534	3.39084e-05	5.1066e-06	0.868781	0.0225161	0.000522054	0.00040979	0.0407484	6.67175e-06	0.955555	0.20218	1.90009e-06	3.27886e-05	0.705654	0.0050923	0.472941	0.740977	1.84374e-05	1.02259e-06	0.034557	7.23279e-07	0.00195186	0.142698	0.480837	0.351786	1.62538e-08	0.00386835	0.0303423	0.0759014	0.00100553	0.512236	0.0478004	0.000121488	0.0361206	0.868542	0.796789
SMEL_009g332450.1	0.890369	0.00666402	0.00163245	0.0250948	0.124473	0.0177459	0.0462137	0.408407	0.11397	0.239299	0.734536	0.0119157	0.0181458	0.14865	0.486881	0.0120689	0.00228013	0.000108304	0.0497612	0.000890072	0.500131	0.000598763	0.644098	0.0552506	0.247231	0.00758446	0.0257487	0.110046	0.00560926	7.84695e-06	7.62215e-09	0.00129864	0.0338365	0.00085671	0.183277	0.0257039	0.000439201	0.090186	5.50587e-08	0.587413	0.714789	0.697323	1.31702e-06	0.559655	0.000246509	0.568015	0.244582	0.426675	3.28533e-11
SMEL_003g193140.1	8.10872e-05	0.0634865	1.29792e-09	0.0845777	0.677307	0.0214382	2.55575e-07	0.827228	0.000865382	0.0513992	0.324838	0.350408	0.458412	0.0153055	2.67688e-05	0.525	0.000447383	4.74608e-07	1.1128e-06	1.17462e-13	0.00234742	5.86927e-10	0.0457078	0.220778	0.436582	0.002874	0.928501	0.000181721	1.6676e-05	0.000312993	0.00872461	1.76303e-13	0.00204427	3.03551e-08	1.00219e-06	0.000106268	0.000939757	0.0341744	8.88178e-16	9.60877e-08	0.00307839	0.95519	0.0125251	0.696116	0.547174	4.64377e-06	0.00964836	0.994015	0.000836686
SMEL_002g164000.1	0.689725	0.0670434	0.349758	0.253523	0.361185	0.417591	0.164592	0.251908	0.429257	0.398859	0.0626008	0.983736	0.446312	0.244104	0.961374	0.70532	0.0333155	0.256374	0.973303	0.108936	0.734082	0.218378	0.0422553	0.928285	0.0913194	0.0797363	0.0203971	0.624387	0.177593	0.050053	0.0191908	0.440605	0.286133	0.133701	0.447568	0.465089	0.557176	0.107031	0.103668	0.820862	0.882758	0.0360125	0.0438086	0.0481087	0.019231	0.774402	0.329025	0.580198	0.00593252
SMEL_008g307820.1	3.59198e-09	0.530499	0	0.850449	0.182624	0.52292	9.98415e-11	0.017635	3.15104e-06	0.00139949	0.0553526	0.0853365	0.393929	0.460042	9.32587e-15	0.481404	3.85938e-06	8.07798e-13	0	0	3.05707e-11	0	0.000419542	0.708653	0.743079	0.00220905	0.499206	0.000107672	1.65378e-06	0.00310728	0.39992	0	0.000254517	3.19744e-14	6.48592e-13	4.66294e-14	0.000224617	0.174345	2.88658e-15	0	2.29991e-08	0.67647	0.400345	0.605334	0.0079476	0	2.85871e-08	0.0396467	0.981582
SMEL_001g124710.1	0.277308	0.73588	0.357398	0.315865	0.273666	0.0294787	0.85898	0.157578	0.0805617	0.184423	0.143296	0.727833	0.0351581	0.584703	0.139984	0.273864	0.605203	0.894167	0.553611	0.637064	0.934541	0.12151	0.51768	0.0194648	0.33143	0.148414	0.578441	0.703819	0.655429	0.887427	0.757846	0.133638	0.720614	0.862337	0.095413	0.849307	0.498018	0.406426	0.0938748	0.126212	0.271647	0.361782	0.0158517	0.00691712	0.876189	0.105896	0.290017	0.690781	0.28589
SMEL_005g227630.1	1.42916e-06	0.307341	0	0.955691	0.394247	0.539002	8.72902e-12	0.00110162	2.11889e-07	0.0273846	0.175132	0.147888	0.619566	0.431002	0	0.0206182	0.00214116	5.34531e-07	8.43769e-15	0	2.7186e-08	0	0.00326644	0.802129	0.781741	3.73318e-05	0.57631	7.90795e-06	0.00354833	0.080221	0.642857	0	0.000946106	7.16982e-13	4.44089e-15	1.92982e-10	0.00178759	0.289258	7.56506e-13	0	8.37098e-06	0.281977	0.353089	0.594128	0.0105755	0	1.1676e-06	0.0934104	0.334313
SMEL_005g239330.1	0.618936	0.349232	2.01787e-08	0.643082	0.640115	0.0183664	3.3458e-07	0.0633227	0.00423949	0.0149649	0.594019	0.228809	0.991734	0.427584	0.000184024	0.188967	0.000625294	1.42556e-07	8.52103e-08	5.50721e-09	0.00115839	2.06688e-09	0.794254	0.124995	0.320585	0.00610683	0.961446	0.0318396	0.00118456	0.00604216	3.53814e-07	7.06282e-09	0.0636089	3.75171e-10	0.000751369	7.73138e-07	6.8755e-05	0.406545	2.57794e-13	0.000649083	0.0552145	0.284785	0.107519	0.101294	0.026928	7.67079e-06	0.00059773	0.476256	0.0048168
SMEL_000g004730.1	8.45358e-08	0.333645	0	0.848631	0.363716	0.786091	1.40128e-11	0.00716844	1.99825e-07	0.00129643	0.115085	0.233144	0.49145	0.339245	0	0.263323	1.99541e-06	5.52491e-12	0	0	1.47487e-09	0	0.000141378	0.870823	0.806673	1.55477e-05	0.747128	1.23456e-07	7.51124e-05	0.015237	0.287925	0	0.000134236	0	0	8.96172e-13	4.17164e-05	0.170155	0	0	3.88474e-09	0.640878	0.575022	0.493824	0.00788285	0	1.81596e-09	0.028805	0.893713
SMEL_001g122190.1	0.00144697	0.442195	0.107534	0.971973	0.128758	0.92822	0.101874	0.96246	0.203961	0.809189	0.056197	0.00608142	0.383616	0.832001	0.0980524	0.133645	0.0746777	0.808539	0.056732	0.0352157	0.200972	0.204962	0.00384267	0.365515	0.404584	0.720776	0.000674204	0.278157	0.680602	0.709791	0.026561	0.26913	0.248095	0.317164	0.0503509	0.0236311	0.221791	0.257969	0.62237	0.0375265	0.141295	0.321519	0.822878	0.965329	8.66186e-05	0.026198	0.717258	0.0557928	0.000130324
SMEL_005g228290.1	0.0566733	0.00206897	0.00728398	0.191347	0.0108038	0.196483	0.036717	0.824006	0.0715311	0.336668	0.641742	0.0145971	0.299305	0.704987	0.336911	0.322321	0.0219494	0.0631526	0.0228538	0.00267243	0.939498	0.00765056	0.272716	0.354135	0.929379	0.030259	0.0502173	0.15174	0.892172	0.00354915	0	0.0253359	0.0144799	5.59074e-05	0.938095	0.109634	0.0491141	0.747687	6.50976e-07	0.976046	0.216253	0.644729	0.000881984	0.00111329	4.88054e-13	0.30717	0.388199	0.0342452	8.47918e-07
SMEL_005g241460.1	0.476406	0.0349997	0.00010327	0.317277	0.0349552	0.585017	0.0402899	0.772823	0.138952	0.0201999	0.0315761	0.0117645	0.226305	0.105366	0.0339004	0.716838	0.00773164	0.00309683	8.63761e-06	1.50588e-05	0.00754359	0.000143621	0.235544	0.798476	0.856153	0.00896128	0.0614248	0.102021	0.0214979	0.0074633	1.2581e-12	8.1033e-05	0.0806678	5.0451e-07	0.229967	0.00786474	0.0116297	0.171335	6.98963e-09	0.0130549	0.821141	0.45203	0.00379751	0.0955239	0.0017749	0.125718	0.187707	0.33839	0.000129085
SMEL_005g242150.1	1.11707e-06	0.0987966	0	0.68734	0.800027	0.649093	1.77156e-11	0.0473779	3.77156e-07	0.00146919	0.0704788	0.311774	0.340768	0.167354	3.70814e-14	0.45841	1.61965e-07	2.61965e-10	0	0	7.8667e-08	0	0.000433017	0.539002	0.473059	1.76582e-05	0.955815	1.80434e-07	6.796e-05	0.00680915	0.00947385	0	1.92992e-05	0	7.99361e-15	1.98686e-11	9.92764e-05	0.136604	0	2.22045e-16	8.20979e-06	0.505493	0.0963034	0.192717	0.249146	8.88178e-16	7.30315e-08	0.0916144	0.262782
SMEL_000g029880.1	7.57934e-07	0.480411	0	0.690949	0.239062	0.505719	7.51399e-13	0.0066771	2.54134e-07	0.00288381	0.0697821	0.192689	0.654767	0.554219	0	0.119437	8.59203e-06	2.32259e-13	0	0	1.53546e-10	0	0.00123311	0.897516	0.820834	0.000110339	0.678267	2.31806e-06	4.58251e-05	0.0202813	0.161712	0	0.000184452	0	1.33227e-14	1.7164e-13	0.000644445	0.298139	0	0	1.2136e-08	0.32216	0.84236	0.343074	0.0386555	0	3.84203e-09	0.0861834	0.965196
SMEL_007g288630.1	2.43754e-05	0.0214415	1.78462e-11	0.71957	0.76454	0.817863	1.82977e-08	0.00595262	6.61827e-05	0.172518	0.495401	0.403967	0.245975	0.34083	1.78613e-12	0.00368367	0.0144008	0.0065654	4.3423e-11	3.01981e-14	4.55092e-05	6.61751e-11	0.132077	0.561344	0.619663	9.73094e-05	0.610254	0.0270319	0.0769758	0.118688	0.0399614	1.72795e-11	0.000642709	1.94847e-08	4.887e-06	9.26424e-07	0.00353973	0.760392	5.7101e-09	3.08686e-12	0.0186245	0.068144	0.591477	0.0480505	0.807484	2.27374e-13	0.000780728	0.476458	0.931131
SMEL_001g134630.1	0.000860062	0.712185	2.44522e-10	0.0987314	0.807554	0.0310357	6.07466e-06	0.277487	0.00382503	0.0888309	0.76974	0.379592	0.110905	0.0299885	7.19592e-06	0.346685	0.00183636	5.4819e-09	5.89565e-06	2.00897e-11	0.00812036	5.25158e-12	0.000728219	0.374775	0.708252	2.96354e-05	0.0751857	1.57987e-06	0.00549701	0.00223525	0.00714508	2.50377e-12	0.00824194	2.24532e-09	2.88189e-07	3.82899e-05	7.37501e-05	0.0349814	6.43929e-15	2.29565e-07	0.000204135	0.757106	0.0487823	0.550626	0.639002	3.4529e-05	2.06913e-05	0.874717	0.00567908
SMEL_007g288510.1	0.00948814	0.00963414	3.75699e-13	0.063586	0.106907	0.125479	1.68208e-05	0.111433	0.000682957	0.000918241	0.5889	0.91948	0.723913	0.0829908	6.83123e-06	0.126784	0.00183484	5.58435e-07	4.43023e-12	2.22045e-15	8.64681e-05	3.33067e-15	0.00178074	0.232177	0.815186	0.000125693	0.442665	0.00040194	3.32911e-05	0.030706	2.54888e-05	6.82121e-13	0.0033827	1.23235e-13	1.88584e-07	8.41503e-09	0.000168773	0.103048	0	7.88067e-07	0.0087355	0.191869	0.04025	0.973002	0.811254	2.19611e-07	0.000377925	0.861559	0.022606
SMEL_010g339270.1	0.0644635	0.0267647	1.88372e-08	0.791862	0.613868	0.339074	2.84806e-07	0.0113605	0.000338619	0.146672	0.636789	0.634479	0.554272	0.136968	4.88345e-08	0.0491707	0.0030755	0.00159499	1.95395e-06	9.474e-11	0.000232694	5.15341e-10	0.199714	0.749944	0.995481	0.00010944	0.615266	4.27408e-05	0.0424203	0.946668	0.0236624	4.02567e-11	0.128932	9.90571e-09	2.22585e-06	0.000293858	0.00130697	0.422318	7.70022e-10	7.12771e-09	0.00141241	0.798865	0.86066	0.825289	0.597208	1.01203e-07	0.0095569	0.561536	0.269914
SMEL_001g141400.1	0.0511102	0.78807	0.572152	0.647489	0.465385	0.255818	0.0437959	0.0010619	0.818851	0.372755	0.0401147	0.0293391	0.000921642	0.268838	0.363638	8.12033e-05	0.00445802	0.356361	0.605428	0.993216	0.11059	0.329557	0.302901	0.968178	5.64469e-05	0.0447743	0.900182	0.693438	0.881676	0.00131165	0.106812	0.182379	0.258793	0.233106	0.611678	0.70616	0.701813	0.738568	0.192898	0.497785	0.57602	0.0388768	0.000316967	0.763696	0.286115	0.174285	0.189454	0.0564038	0.647908
SMEL_000g091530.1	0.342506	0.001742	1.93237e-10	0.347485	0.0245958	0.312982	2.11069e-05	0.16335	0.000791422	0.0435833	0.931776	0.0974912	0.593117	0.946351	0.000476203	0.0436874	0.000535242	9.26109e-05	4.59685e-08	3.81772e-10	0.00119123	7.5586e-10	0.577368	0.72145	0.618673	4.4452e-05	0.20499	0.00253398	0.158693	0.0342979	2.13423e-10	1.76845e-08	4.76458e-05	2.03948e-12	0.000616902	2.17748e-05	0.000172745	0.943664	3.55271e-15	0.000337957	0.024682	0.276954	0.136262	0.0256221	0.0070955	6.95982e-06	0.00301894	0.586005	0.00257605
SMEL_000g061370.1	2.10417e-08	0.69748	0	0.993124	0.32342	0.310014	1.37745e-09	0.0131886	2.59447e-08	0.000857867	0.033963	0.0687309	0.631772	0.544092	4.44089e-16	0.156546	9.80776e-06	1.73842e-07	0	0	1.06084e-08	0	2.0274e-05	0.998512	0.482841	0.000280064	0.604314	1.61092e-06	0.000349724	0.0305857	0.840951	0	0.000225142	9.14824e-14	0	5.37348e-14	0.00209103	0.23314	8.22364e-12	0	2.53976e-07	0.292834	0.725619	0.571245	0.000834982	0	1.6056e-08	0.00672372	0.331976
SMEL_005g238230.1	0.192326	0.142223	4.41324e-07	0.137484	0.322607	0.461595	1.73173e-07	0.00285508	0.159894	0.418031	0.678373	0.0485929	0.332294	0.454683	0.00775829	0.942633	3.70938e-05	8.656e-08	0.000262937	2.25054e-07	0.00016861	1.67074e-07	0.350105	0.41762	0.745521	0.000386087	0.831045	0.000813415	0.0367689	0.26231	0.000474418	2.72947e-06	0.0487105	7.44834e-07	0.00742988	0.0102171	0.00605281	0.679171	4.04091e-07	9.82313e-05	0.0325526	0.401007	0.327986	0.00176323	0.10503	0.000150437	0.00588912	0.674524	0.0104686
SMEL_003g199000.1	0.000749208	0.824631	2.52817e-10	0.565116	0.638086	0.574186	2.67534e-05	0.0496689	1.29496e-05	0.00344241	0.19648	0.242111	0.349248	0.135159	2.42029e-13	0.358899	0.001612	4.02377e-05	8.41598e-10	5.1088e-12	0.000416983	6.18394e-12	0.00219324	0.254441	0.953781	0.0082998	0.349386	5.51189e-05	0.076191	0.0223367	0.466116	7.55485e-12	0.010808	3.57983e-07	1.26953e-08	3.82826e-05	0.000729324	0.1771	5.64354e-09	5.44631e-12	0.000610636	0.706701	0.872467	0.884646	0.122576	1.408e-09	0.000551457	0.393262	0.504351
SMEL_000g004100.1	1.88262e-09	0.659456	2.66454e-15	0.837723	0.38674	0.674353	2.62404e-08	0.064551	5.53077e-05	0.00670386	0.0461156	0.833774	0.48864	0.0974114	8.52918e-12	0.746228	0.000662158	2.04545e-10	3.9968e-14	0	8.93466e-10	4.44089e-16	1.01782e-05	0.452176	0.983517	0.000393033	0.763085	6.66177e-06	2.44611e-05	0.015999	0.339828	0	0.0401284	1.43441e-13	1.26976e-10	5.00289e-11	0.000479968	0.0532819	1.64313e-14	1.33227e-15	3.83791e-06	0.823812	0.361542	0.924759	0.00119523	9.49815e-10	4.98886e-06	0.0560446	0.994019
SMEL_003g181850.1	0.117237	0.653269	0.0001445	0.793541	0.93866	0.0371	0.269517	0.244439	0.0830232	0.00212237	0.0592153	0.957476	0.0121369	0.374664	0.185032	0.509822	3.59445e-05	0.0846894	2.91786e-05	0.000488855	0.051547	0.000295079	0.0203197	0.978041	0.00624079	0.0868535	0.435636	0.0125394	0.0890775	0.0558236	0.0669016	0.0790525	0.00927064	0.00110045	0.0187213	0.000856707	0.0228736	0.723644	0.0441358	0.0171477	0.207735	0.586925	0.00361626	0.0537499	0.719937	0.222568	0.00259131	0.120849	0.412478
SMEL_004g202790.1	0.00119744	0.449037	0	0.873226	0.724412	0.348771	3.5083e-14	0.00369946	3.42163e-07	0.0314655	0.288242	0.922921	0.982551	0.459333	3.81917e-14	0.0158453	2.58878e-05	8.73313e-11	0	0	4.08712e-08	0	0.020127	0.994436	0.210634	1.02305e-06	0.928946	4.67369e-08	0.00852908	0.158358	0.00208676	0	9.93124e-05	0	3.43725e-13	5.37407e-09	0.000561518	0.529313	0	4.06342e-14	7.16592e-08	0.605279	0.913088	0.148858	0.451651	0	1.57603e-07	0.487981	0.702013
SMEL_007g292380.1	5.35452e-07	0.327859	0	0.813794	0.300546	0.59019	1.32183e-12	0.00918309	9.58314e-08	0.00349816	0.0918656	0.201612	0.705067	0.510676	0	0.106012	9.0892e-06	7.09477e-12	0	0	6.82622e-10	0	0.00104195	0.989832	0.977743	5.58747e-05	0.768183	1.78446e-06	6.86101e-05	0.0203562	0.140016	0	8.00486e-05	0	4.44089e-16	1.24345e-14	0.000301814	0.209358	0	0	1.11811e-08	0.376079	0.786308	0.385902	0.0380813	0	6.15103e-09	0.0655569	0.920108
SMEL_003g178610.1	0.00473526	0.214257	0.117478	0.341517	0.365526	0.084812	0.466314	0.365098	0.380206	0.445475	0.961103	0.436433	0.239377	0.023595	0.357699	0.325262	0.398798	0.0517117	0.0586044	0.00473746	0.0679354	0.0334815	0.0190003	0.313728	0.193346	0.37568	0.117289	0.684911	0.0049501	0.000202761	0.00209829	0.0108708	0.603646	0.124412	0.172404	0.00698218	0.42301	0.00252723	0.000190539	0.00745824	0.830873	0.601027	0.0213383	0.271384	0.938182	0.526007	0.693134	0.403858	0.00819447
SMEL_000g064350.1	0.00617131	0.886841	1.04131e-08	0.884426	0.52497	0.33218	7.66907e-08	0.0478632	1.97974e-05	0.191903	0.908699	0.12369	0.870076	0.158075	4.24745e-11	0.0312575	0.0738909	0.00017018	1.84286e-05	3.40953e-10	0.0029531	2.90187e-10	0.00329989	0.986628	0.154737	8.30471e-05	0.437961	2.01475e-10	0.854002	0.989577	0.865659	5.64659e-13	0.123678	7.16004e-10	3.35949e-11	0.00207095	0.0305449	0.526076	1.8922e-08	6.67669e-10	2.10869e-06	0.466383	0.105	0.948403	0.00490636	6.24336e-09	0.000290037	0.194305	0.32393
SMEL_008g312510.1	0.0015975	0.713568	4.44089e-16	0.735639	0.989735	0.028239	5.57169e-09	0.00334609	3.74411e-06	0.123442	0.215505	0.900609	0.924908	0.23797	6.76048e-08	0.0274921	0.0018655	1.20985e-07	3.47389e-12	4.44089e-16	3.43028e-05	0	0.0168659	0.819246	0.143088	2.79034e-08	0.697693	2.98936e-08	0.0116629	0.157042	0.00769107	0	0.000877478	3.10862e-15	1.80922e-12	5.00351e-07	0.00290255	0.366484	0	4.25571e-12	2.89021e-07	0.609872	0.861278	0.788737	0.137444	1.46895e-09	9.92658e-07	0.428585	0.695561
SMEL_009g325840.1	0.00522455	0.216434	3.54179e-11	0.197454	0.710234	0.237567	3.20249e-07	0.580148	2.46538e-06	0.0102907	0.212068	0.476696	0.670473	0.307305	4.05589e-07	0.372352	0.00181473	6.95192e-05	1.6705e-08	2.08944e-13	3.47521e-05	7.87994e-11	0.00420507	0.994693	0.791472	0.000111619	0.301674	0.00513003	0.000466223	0.00988663	0.0358298	5.98632e-12	0.000702174	2.81568e-08	9.32645e-08	4.81453e-08	0.00105671	0.018086	3.41949e-13	4.31469e-07	0.000353039	0.471439	0.29268	0.672173	0.447714	5.16012e-07	0.000870221	0.166487	0.115175
L.Valine	0.833588	0.434966	0.333558	0.256938	0.461908	0.635982	0.821929	0.226973	0.795445	0.0770828	0.0314335	0.810619	0.703397	0.820722	0.817946	0.8369	0.070976	0.182878	0.0684075	0.126587	0.517453	0.312115	0.859842	0.268876	0.604488	0.309944	0.199663	0.262518	0.158926	0.14668	0.0039984	0.64219	0.627532	0.108679	0.719026	0.902927	0.170625	0.0466846	0.171336	0.622628	0.949705	0.594754	0.00767278	0.265008	0.0145362	0.977616	0.253352	0.360553	0.0562697
L.Alanine	0.00214432	0.676225	1.18868e-10	0.957406	0.726318	0.820075	7.81144e-09	0.0959208	0.00351139	0.17483	0.254309	0.541875	0.534212	0.508501	2.37849e-06	0.11961	0.00266796	1.70936e-07	2.25897e-08	2.0024e-12	1.58283e-06	1.32263e-11	0.373205	0.821947	0.326422	0.00990348	0.868677	0.000202187	0.0200719	0.0639902	0.0125772	5.06186e-11	0.0253766	2.12144e-09	1.98405e-06	8.70929e-06	0.00983044	0.487045	6.39511e-11	1.97055e-07	7.07569e-05	0.696712	0.586794	0.0372526	0.952479	2.60675e-10	0.000259916	0.800236	0.357141
Shikimic.acid	2.46794e-05	0.609168	0	0.815373	0.508286	0.969996	1.33689e-10	0.0111297	2.1561e-07	0.0927146	0.414967	0.715229	0.93607	0.459963	1.25722e-12	0.362959	5.09052e-05	7.30971e-13	7.01794e-12	0	4.16293e-06	0	0.0174899	0.740357	0.239437	2.867e-05	0.901529	1.76397e-07	0.0141376	0.0621477	0.115249	0	0.00433224	2.22045e-16	1.17595e-12	2.40925e-07	0.000200414	0.574243	0	1.33671e-13	2.17104e-08	0.737248	0.9206	0.694261	0.178407	3.98792e-13	4.13835e-06	0.318738	0.462357
Citric.acid	1.97456e-05	0.808061	4.67404e-13	0.0961512	0.541777	0.354725	5.38644e-09	0.0129658	1.59073e-05	0.0368146	0.0877287	0.473999	0.840048	0.782794	7.25597e-12	0.0954949	9.57434e-05	4.40119e-09	9.59544e-12	0	7.38835e-07	1.28786e-14	0.0356166	0.613103	0.357461	0.00151338	0.58976	3.37907e-06	0.0805627	0.139034	0.242878	0	0.00625546	7.23865e-14	1.74075e-09	2.76829e-06	0.0131876	0.827906	4.1207e-12	2.55351e-13	4.21108e-07	0.987195	0.52577	0.147553	0.0953086	1.46549e-14	5.48916e-06	0.167462	0.286853
Dehydroascorbic.acid	2.13857e-05	0.74074	0	0.790937	0.594248	0.681312	9.38831e-11	0.0545469	6.65756e-06	0.0551082	0.432849	0.317579	0.426449	0.519903	5.19147e-11	0.394945	2.93539e-05	1.35275e-10	3.43255e-10	2.22045e-15	1.41734e-05	2.22045e-15	0.00265356	0.284168	0.55487	0.000750853	0.656707	7.62122e-06	0.0146008	0.0252164	0.496933	0	0.0145045	1.14531e-12	3.73734e-11	1.54175e-07	0.000770739	0.53886	2.03837e-13	1.67497e-11	1.13034e-08	0.459196	0.384622	0.815804	0.0214719	1.71885e-11	1.9118e-05	0.508398	0.592392
Quinic.acid	0.000298478	0.535655	0	0.653354	0.266874	0.994995	5.13367e-13	0.00563579	6.34018e-06	0.0134247	0.495649	0.921525	0.869353	0.33981	7.82092e-11	0.17442	0.00048443	2.8022e-13	1.79634e-13	0	9.45487e-06	0	0.00931706	0.804439	0.193936	1.00858e-05	0.640195	5.49068e-07	0.0101548	0.124497	0.0209005	0	0.0046859	0	1.08588e-09	1.08713e-07	0.000255247	0.649125	0	9.36451e-12	2.71566e-07	0.871746	0.639691	0.261768	0.33681	2.84794e-12	5.34846e-07	0.409856	0.564711
myo.Inositol	0.00267777	0.507799	3.34081e-10	0.489204	0.617342	0.969022	6.09883e-08	0.0150424	0.0094767	0.0468048	0.194435	0.826203	0.968048	0.146861	9.71039e-07	0.359724	0.00195557	4.67608e-11	1.05194e-10	4.48286e-12	6.82008e-09	6.91502e-11	0.00774081	0.942551	0.0575772	0.000209652	0.838227	0.00265329	0.0161977	0.1553	0.0210297	7.99361e-15	0.0408012	2.08056e-13	8.08236e-06	5.34713e-05	0.0157832	0.835805	6.26099e-12	1.67327e-07	5.69876e-07	0.582264	0.308154	0.173377	0.475798	8.62708e-08	2.19138e-05	0.594408	0.545812
Sucrose	0.0400626	0.943113	1.23912e-05	0.202094	0.200648	0.301171	3.7991e-06	0.00752434	0.000100759	0.581232	0.461755	0.430931	0.485219	0.641525	8.40274e-08	0.0600045	0.00670921	0.0109866	0.000268544	1.1854e-07	0.0124741	2.15517e-07	0.460679	0.429728	0.307862	0.00221406	0.9429	1.06182e-07	0.407658	0.882328	0.894987	7.37939e-06	0.0620524	5.67078e-07	6.97604e-09	0.00253995	0.0900838	0.470052	4.90232e-05	8.33013e-07	9.19742e-05	0.955678	0.162177	0.0498573	0.0805091	3.27113e-07	0.000182576	0.0679486	0.0797989
D.Fructose	0.0158795	0.27895	2.47026e-08	0.923795	0.414353	0.993243	5.64299e-07	3.70943e-05	0.000108359	0.0559061	0.627306	0.340954	0.223435	0.028209	1.55947e-06	0.475159	0.0116023	1.98539e-05	1.3383e-09	1.44113e-08	1.32417e-06	5.71403e-11	0.14536	0.424684	0.207453	0.000100511	0.830032	0.0105025	0.0102211	0.140595	0.0340561	1.55257e-09	0.118652	4.02754e-10	1.74454e-06	9.33088e-06	8.3834e-05	0.184268	2.48837e-09	1.03604e-07	0.0107234	0.767044	0.764315	0.690657	0.521428	1.20867e-06	1.9947e-05	0.38018	0.165016
D.Glucose	0.0808483	0.413677	4.62487e-08	0.178917	0.633931	0.523633	2.58207e-06	0.00275701	9.28618e-07	0.0954586	0.734703	0.263597	0.531803	0.889831	1.85631e-05	0.161884	0.00234527	5.47158e-07	8.11682e-10	2.27344e-07	1.23965e-07	2.7203e-08	0.217034	0.632978	0.0589501	0.0154055	0.802606	0.0424312	0.00340682	0.1208	0.0023681	6.60951e-09	0.203129	8.11995e-12	0.000649	0.000196788	0.00158876	0.431905	6.2441e-10	4.43594e-05	0.000330572	0.875319	0.991944	0.929645	0.642857	1.84628e-05	7.17204e-05	0.591208	0.758097
L.Arabinose	0.000329674	0.988829	9.33817e-09	0.267408	0.0809616	0.797036	3.72048e-05	0.025819	0.000676324	0.192858	0.526182	0.479123	0.140953	0.505401	2.15597e-07	0.373087	0.000697049	1.00281e-05	1.83742e-05	1.32859e-08	0.000847616	4.03441e-09	0.0225827	0.741914	0.562689	0.00136479	0.190436	0.000305378	0.182175	0.256741	0.623438	1.10721e-09	0.00535857	2.24983e-05	3.13785e-06	5.6531e-06	0.133639	0.0804781	5.44716e-06	4.36906e-08	0.000403252	0.515143	0.543344	0.649235	0.0444855	4.70409e-09	0.00127747	0.0589926	0.385618
L.Malic.acid	0.0649249	0.187859	0.490395	0.994145	0.361114	0.260837	0.756448	0.138859	0.513876	0.219615	0.644285	0.0697076	0.580259	0.204756	0.181446	0.828689	0.599286	0.371219	0.0495179	0.382041	0.0930776	0.269256	0.297874	0.352098	0.23044	0.977294	0.435385	0.0896882	0.00300367	0.298101	0.460859	0.15808	0.60053	0.840779	0.147361	0.0249484	0.523751	0.0246552	0.736902	0.0793817	0.26449	0.45078	0.814143	0.0761885	0.131532	0.126061	0.915805	0.497835	0.440683
L.Serine	0.000375027	0.418941	5.77316e-15	0.641274	0.616057	0.568303	4.01549e-10	0.00924484	3.50881e-05	0.00541141	0.283696	0.886683	0.46755	0.133623	1.19667e-09	0.0681091	0.00014899	2.56703e-08	1.08891e-12	1.77636e-15	4.84144e-06	1.55431e-15	0.0728096	0.719121	0.493934	0.00145473	0.990304	1.32839e-05	0.00579069	0.0391243	0.0134123	3.10862e-14	0.0201996	1.22125e-14	4.43739e-08	6.15813e-06	0.000109346	0.621244	1.65512e-12	1.62473e-10	4.9368e-05	0.745264	0.490698	0.148509	0.51937	1.00505e-10	8.50913e-07	0.284362	0.403758
L.Isoleucine	0.00687018	0.396193	0.0297707	0.782963	0.798549	0.753883	0.00500979	0.0884136	0.993721	0.433956	0.890054	0.341579	0.379939	0.245513	0.0999696	0.637862	0.276695	0.1554	0.103645	0.0661728	0.0895404	0.0659242	0.453787	0.963346	0.951859	0.657575	0.238374	0.43373	0.213266	0.488505	0.471053	0.034322	0.922262	0.242943	0.624802	0.0892996	0.708903	0.877834	0.229593	0.00807016	0.861659	0.426942	0.441031	0.467124	0.382518	0.0429807	0.600585	0.982808	0.386282
L.Leucine	0.68238	0.268062	0.538613	0.47265	0.965591	0.959243	0.836362	0.501817	0.635867	0.817951	0.236632	0.330462	0.0826353	0.0821635	0.727585	0.896174	0.352079	0.666903	0.561677	0.867346	0.0589214	0.748761	0.881167	0.601975	0.00414239	0.778526	0.796336	0.00620217	0.30695	0.519006	0.400476	0.556294	0.509062	0.568809	0.739696	0.336014	0.272024	0.635772	0.865552	0.765287	0.729609	0.0234721	0.181582	0.783235	0.585509	0.146281	0.49721	0.506027	0.278282
L.Proline	0.0340287	0.62779	0.288587	0.276333	0.70609	0.598195	0.228185	0.18754	0.277577	0.622749	0.187186	0.431632	0.614086	0.840789	0.0717245	0.950241	0.687835	0.219468	0.634164	0.222906	0.874348	0.189923	0.89992	0.647224	0.780713	0.0432434	0.248202	0.494072	0.864311	0.993665	0.146433	0.0446461	0.290922	0.637555	0.0350927	0.475589	0.497079	0.656846	0.357777	0.140049	0.422044	0.792819	0.213903	0.213218	0.443359	0.0278385	0.259459	0.469902	0.279955
Glycine	0.0150014	0.064481	1.67946e-11	0.750942	0.660525	0.567906	1.18265e-05	0.0347073	1.29923e-05	0.0517609	0.506625	0.874515	0.870854	0.630592	8.84548e-06	0.289685	0.000102218	6.27334e-06	6.96256e-11	4.06276e-10	4.042e-06	9.18514e-11	0.348628	0.798682	0.624156	0.00617099	0.807526	0.00751796	0.0139154	0.000955146	0.000203991	9.06789e-09	0.000515372	3.3826e-09	6.07512e-05	8.13396e-09	0.000797628	0.400795	7.62923e-12	7.3908e-07	0.0065807	0.245609	0.248949	0.1787	0.439704	1.43019e-08	0.00144319	0.138963	0.150773
L.Threonine	0.816953	0.883468	0.0468665	0.00283557	0.741871	0.0994977	0.00280783	0.62158	0.35161	0.686474	0.570325	0.614232	0.545673	0.662927	0.290159	0.0986099	0.195004	0.720426	0.10532	0.0418282	0.540885	0.103774	0.390031	0.453268	0.440721	0.287618	0.240915	0.0150041	0.833997	0.636734	0.0460038	0.1499	0.0710493	0.0444969	0.467928	0.760202	0.210202	0.234257	0.0964811	0.189862	0.533406	0.163063	0.821788	0.0854088	0.111955	0.098201	0.201369	0.39579	0.131754
L.Aspartic.acid	0.000284974	0.608604	4.11701e-09	0.923323	0.587082	0.229678	0.000310964	0.546775	7.68229e-05	0.00054212	0.00078608	0.360919	0.0560804	0.423082	2.64258e-05	0.600881	7.2543e-05	1.87268e-06	4.67895e-09	9.35598e-09	0.000212639	5.03408e-07	0.0149126	0.13496	0.0132445	0.179523	0.230115	0.00348845	1.42279e-05	1.02732e-05	0.221523	8.72911e-07	0.00148306	3.74069e-06	0.000178914	4.02301e-07	6.72215e-05	0.548267	6.50308e-07	6.59962e-07	0.00115638	0.719045	0.00976032	0.51668	0.308811	7.81457e-05	0.000129034	0.134827	0.109951
L.Cysteine	0.44774	0.919987	0.00456776	0.877919	0.973691	0.117631	0.0441545	0.204824	0.110163	0.169209	0.152884	0.459743	0.544956	0.447056	0.161809	0.150851	0.0687181	0.0726233	0.00290678	0.0121657	0.0703207	0.00565007	0.488441	0.323625	0.293172	0.794954	0.968705	0.459324	0.378038	0.238507	0.0191042	0.0164907	0.783461	0.000953858	0.61388	0.0312782	0.013714	0.183301	0.0103141	0.0411754	0.206693	0.981863	0.949831	0.0403894	0.247614	0.0160974	0.103786	0.675031	0.631272
L.Glutamic.acid	0.0306071	0.0662234	3.40877e-05	0.884787	0.367009	0.477848	0.00553639	0.222875	0.0119897	0.0493556	0.0212192	0.879486	0.686495	0.446745	0.00232635	0.399181	0.0100065	0.00162625	6.49825e-06	5.07052e-06	0.000927327	3.21785e-06	0.112055	0.760842	0.452509	0.00682509	0.083438	0.000418425	0.00255538	0.178952	0.020187	6.36039e-05	0.83582	7.52149e-08	0.000195444	0.000194704	0.0100685	0.472762	6.29552e-06	0.000213486	0.0246525	0.3568	0.0493358	0.990361	0.340251	0.0172438	0.00211959	0.796356	0.0674612
L.Phenylalanine	0.364201	0.610952	0.228238	0.436759	0.0651263	0.764879	0.908556	0.74952	0.677485	0.281137	0.147432	0.458256	0.902385	0.392963	0.316505	0.201852	0.217796	0.541331	0.184578	0.666151	0.949161	0.640637	0.429978	0.829247	0.974248	0.584597	0.372731	0.629805	0.999155	0.844975	0.00182033	0.93583	0.951723	0.0283737	0.429367	0.393174	0.513521	0.0508248	0.219969	0.389326	0.559573	0.630257	0.025753	0.159333	0.0522881	0.837345	0.768223	0.155033	0.0663148
L.Asparagine	0.0518013	0.382513	7.19001e-05	0.874924	0.788262	0.258456	0.00818583	0.735736	0.000138614	0.0200421	0.112565	0.91668	0.40592	0.49445	5.32928e-05	0.954971	0.0021943	0.00340642	7.82498e-05	2.02543e-06	0.00368494	7.69258e-06	0.392708	0.989144	0.654378	0.160218	0.172934	0.0237263	0.000706894	0.0111855	0.0293937	4.21552e-05	0.0240643	5.40626e-05	0.000271667	0.000346098	0.000102345	0.196322	2.58906e-06	4.51827e-05	0.0209559	0.923209	0.379404	0.677656	0.882362	0.00100698	0.00048121	0.00220945	0.195278
Succinic.acid	0.311709	0.0377924	0.00282194	0.169375	0.11779	0.784414	0.003231	0.664795	0.0236637	0.114624	0.0964383	0.769756	0.180273	0.61094	0.00975129	0.00540432	0.537005	0.108048	0.000706888	0.000991636	0.0305893	0.0107644	0.302431	0.897279	0.0638678	0.234621	0.734419	0.197571	0.1818	0.671733	0.00915753	0.00100977	0.944446	3.20477e-06	0.0337261	0.066557	0.20279	0.302945	3.12829e-05	0.0514885	0.117566	0.504868	0.773746	0.821855	0.976273	0.0281745	0.271837	0.57876	0.51504
Glyceric.acid	0.00125635	0.353096	6.21725e-15	0.853499	0.775122	0.673698	2.44009e-10	0.0655895	5.13248e-05	0.0196028	0.238676	0.768821	0.789205	0.544277	1.6859e-08	0.0263115	0.000165205	1.94019e-07	1.08247e-12	8.88178e-16	7.73979e-06	5.39568e-14	0.0700979	0.862513	0.393927	0.000194744	0.777554	7.3464e-06	0.0176976	0.0586135	0.00345351	7.50511e-14	0.0100313	3.37508e-14	6.22796e-07	2.44516e-05	0.00278218	0.521459	1.24523e-12	9.37415e-10	9.6264e-06	0.945738	0.435036	0.0663148	0.738709	3.62346e-09	6.09196e-07	0.584426	0.538089
Fumaric.acid	0.000547476	0.895748	8.48601e-11	0.0867344	0.636179	0.123916	7.1193e-08	0.0450992	0.000735809	0.146048	0.447819	0.84595	0.993339	0.0074414	9.67089e-07	0.0618076	0.00587537	2.86167e-05	9.15599e-10	1.44849e-11	0.000159062	1.62638e-10	0.0135195	0.669382	0.199205	0.00192468	0.651826	1.25189e-05	0.219236	0.0567281	0.0428858	4.82901e-10	0.00657703	4.00231e-09	3.43116e-06	0.000700789	0.00956699	0.904234	3.53545e-09	7.04077e-09	0.000477506	0.154305	0.660916	0.139514	0.390794	7.71764e-09	0.00335316	0.807744	0.899292
Pyroglutamic.acid	0.0391378	0.723658	9.37623e-08	0.411005	0.437772	0.626486	0.00283656	0.116176	0.00389235	0.0185844	0.414747	0.207216	0.771694	0.584101	8.91284e-05	0.147372	0.141656	0.000385152	5.662e-07	3.8201e-07	0.00192076	2.77087e-08	0.0238719	0.779231	0.828346	0.00213805	0.402176	0.0169809	0.00111608	0.494972	0.768617	2.53735e-08	0.0243387	0.000272661	9.07258e-07	3.68318e-06	0.0181519	0.0266315	1.05025e-05	1.82631e-06	0.000236839	0.538332	0.618217	0.63611	0.278268	1.58648e-06	0.0049205	0.148624	0.988555
Oxalic.acid	0.220834	0.061579	0.000141964	0.0377232	0.687956	0.785622	0.0241811	0.87123	0.0432844	0.00948752	0.259488	0.336102	0.390396	0.190123	0.00544649	0.797732	0.148196	0.0122124	3.1085e-05	0.000172007	0.00211263	0.00372036	0.0357678	0.0201953	0.92009	0.795276	0.766696	0.686635	0.0379473	0.0200227	0.187473	0.00814113	0.0477613	0.0382239	0.0680849	0.00147698	0.103306	0.4939	0.0067626	0.0102091	0.129896	0.187594	0.0845982	0.13057	0.789638	0.000304271	0.383349	0.591559	0.314207
M1118T1173	3.07788e-05	0.0648664	1.08136e-13	0.615668	0.605946	0.522205	3.42409e-07	0.0327842	7.33478e-05	0.00335668	0.112451	0.816504	0.4751	0.523974	4.98812e-09	0.661534	8.96367e-06	3.99022e-08	2.44249e-15	4.44089e-16	9.50176e-09	1.77636e-15	0.00686765	0.941198	0.847048	3.00142e-05	0.937795	0.000889124	0.00126401	0.00155009	0.0162355	2.22045e-15	0.0159309	8.43769e-15	3.4572e-07	1.77817e-07	2.11602e-06	0.866393	1.49238e-11	3.8253e-11	1.4012e-06	0.437378	0.0847954	0.169408	0.335229	3.63586e-07	1.85225e-07	0.0453755	0.496068
M1066T1069	0.000244895	0.265338	4.3944e-10	0.16971	0.315718	0.476159	5.9629e-08	0.00841273	3.04707e-05	0.0467531	0.435243	0.355199	0.627618	0.745105	4.44663e-09	0.394052	6.43532e-05	2.37881e-06	1.79806e-07	5.87603e-11	0.000615739	9.43055e-11	0.239372	0.321627	0.800068	5.52026e-05	0.27271	8.7988e-08	0.097215	0.575831	0.818282	1.06568e-11	0.00615974	5.44169e-11	1.66381e-08	0.00073764	0.000102732	0.764532	1.66825e-07	4.79346e-10	1.54621e-06	0.900747	0.526436	0.679576	0.088769	1.18313e-07	2.06595e-07	0.0591798	0.918084
M869T830	0.922744	0.580358	0.0199389	0.638862	0.931557	0.381951	0.361972	0.0456756	0.101315	0.756161	0.00821529	0.432086	0.730212	0.219302	0.0876351	0.0401078	0.782886	0.446712	0.0994513	0.0301475	0.701173	0.0243661	0.893104	0.500899	0.468969	0.185987	0.542628	0.288954	0.763577	0.818808	0.0291581	0.0354241	0.00019069	0.290454	0.206357	0.260848	0.948079	0.0841079	0.0953943	0.226622	0.532708	0.00698642	0.0947718	0.34859	0.0769649	0.000566812	0.545525	0.587164	0.62668
M862T924	0.0422241	0.58375	1.84633e-05	0.140683	0.101265	0.453284	1.61716e-05	0.126519	0.000268193	0.683131	0.880953	0.628497	0.663239	0.917538	6.53814e-06	0.282949	0.00364838	0.000331732	0.0105201	4.52267e-06	0.170982	5.22176e-06	0.238577	0.58985	0.428228	0.00131137	0.432511	3.18146e-12	0.686036	0.484803	0.496921	1.04819e-06	0.00965382	3.41907e-05	1.16525e-06	0.181348	0.1183	0.525029	6.14408e-05	1.06244e-06	1.22207e-06	0.619179	0.0319958	0.870195	0.0192161	2.97648e-05	0.00368195	0.286828	0.268566
M885T703	0.755675	0.0588973	0.133571	0.0729605	0.174641	0.153497	0.0532842	0.220425	0.052224	0.0826784	0.123714	0.735578	0.856285	0.843631	0.0326971	0.0958223	0.437238	0.1805	0.967897	0.121681	0.753508	0.13202	0.949889	0.163028	0.0520032	0.106651	0.447578	9.69063e-06	0.0419597	0.00817318	0.256746	0.0358308	0.0273109	0.252852	0.0185114	0.374892	0.396042	0.356009	0.139188	0.0293608	0.00802801	0.81113	4.77624e-05	0.622459	0.116471	0.0163888	0.425085	0.998351	0.0817673
M887T705	0.0628012	0.344108	0.000282677	0.098021	0.182632	0.200842	0.000127448	0.0852062	0.000743812	0.699325	0.401771	0.552114	0.867889	0.815077	7.98984e-05	0.144345	0.0161519	0.00447686	0.0398441	9.96136e-05	0.231025	0.00010675	0.287737	0.235635	0.246486	0.00158035	0.367578	1.92641e-11	0.405324	0.189285	0.420884	1.48564e-05	0.00835756	0.000359594	7.90067e-06	0.536392	0.264531	0.437667	0.000522072	4.41809e-06	3.19323e-06	0.605544	0.00806834	0.680963	0.0118637	0.000355518	0.00840362	0.395496	0.146301
M971T749	0.0790741	0.00460222	0.0755351	0.70172	0.347156	0.19801	0.504678	0.833546	0.496456	0.0113764	0.0736784	0.561886	0.413843	0.870968	0.381447	0.255945	0.0629735	0.214613	0.000816525	0.0292744	0.00667212	0.0525965	0.153621	0.8176	0.101259	0.256342	0.518143	0.360798	0.0106978	0.000653237	0.0150922	0.0836106	0.735171	0.00513669	0.722385	0.0255699	0.000406997	0.478783	0.0744259	0.206546	0.370118	0.132776	0.00012878	0.423077	0.522057	0.787286	0.0568374	0.283071	0.155868
M971T770	0.237576	0.00231292	0.230439	0.569635	0.658334	0.224356	0.665242	0.65706	0.754248	0.0130178	0.136133	0.449286	0.334747	0.913295	0.785104	0.119401	0.151429	0.401618	0.0141888	0.161028	0.0382314	0.191481	0.252498	0.337181	0.0459913	0.498919	0.415349	0.146615	0.027381	0.000376526	0.0435662	0.380846	0.315077	0.049927	0.872794	0.0246333	0.000928042	0.440961	0.248174	0.490093	0.74426	0.148953	4.41095e-05	0.399178	0.578664	0.432808	0.196905	0.351787	0.135039
M1003T1070	0.000622266	0.54521	3.50164e-13	0.91907	0.491551	0.264704	6.37977e-08	0.0217749	3.54985e-05	0.267667	0.476355	0.62349	0.278292	0.489204	5.73917e-09	0.279288	0.000323095	1.17756e-07	7.22552e-10	2.84217e-14	2.60755e-05	1.77636e-15	0.00223649	0.466845	0.461489	2.34026e-07	0.900484	7.42051e-12	0.0495028	0.130993	0.10298	2.22045e-15	0.00384451	1.05072e-12	5.13772e-10	0.000206556	0.000658116	0.534966	1.0516e-12	5.69322e-13	1.94293e-10	0.538983	0.827077	0.853444	0.0749346	3.22831e-07	8.13664e-07	0.183758	0.849449
M952T757	0.20189	0.0059509	0.21006	0.66032	0.76606	0.23239	0.66768	0.67187	0.6738	0.015457	0.10691	0.41672	0.26864	0.72737	0.68907	0.097143	0.12565	0.30668	0.011658	0.1425	0.031779	0.16185	0.19321	0.34198	0.060746	0.4653	0.3831	0.28391	0.02882	0.00046982	0.071282	0.33691	0.27974	0.033698	0.97262	0.025387	0.00084639	0.4298	0.22093	0.413	0.46805	0.10534	6.6237e-05	0.46619	0.82323	0.40203	0.13861	0.27965	0.19241
M866T819	0.73593	0.52275	0.33556	0.11708	0.012028	0.9151	0.022994	0.93361	0.55318	0.95956	0.68189	0.67199	0.37234	0.97951	0.19398	0.05269	0.14393	0.00026445	0.58701	0.50188	0.82534	0.34875	0.38335	0.13835	0.28213	0.92943	0.82005	0.042053	0.68761	0.60997	0.1705	0.070687	0.50544	0.53027	0.61934	0.91531	0.53586	0.74002	0.13086	0.17567	0.05905	0.77578	0.44509	0.45265	0.73893	0.26788	0.48383	0.79235	0.24018
[truncated: 111 more columns]

## Sheet: Table S8
Table S8. Pair comparisons: variables with significantly altered levels are indicated in detailed data table (FDR p-ajusted <0.05). Variables with LOG2 (FC) ≥ ± 1 are marked in yellow. A) T0, B) T1 and C) T2
A.	UP-		FC	log2(FC)	p.ajusted	-LOG10(p)		B.	UP-		FC	log2(FC)	p.ajusted	-LOG10(p)		C.	UP-		FC	log2(FC)	p.ajusted	-LOG10(p)
Shoot_T0_AM222_vs_AM22	ko:K01637 E4.1.3.1; isocitrate lyase [EC:4.1.3.1]	SMEL_007g288630.1	12.064	3.5927	0.00083667	3.0774		Shoot_T1_AM222_vs_AM22	ko:K13679 WAXY; granule-bound starch synthase [EC:2.4.1.242]	SMEL_000g036450.1	4.1663	2.0588	0.02424	1.6155		Shoot_T2_AM222_vs_AM22	C00031	D-Glucose	173.85	7.4417	0.043993	1.3566
	ko:K00133 asd; aspartate-semialdehyde dehydrogenase [EC:1.2.1.11]	SMEL_001g151200.1	2.0074	1.0053	0.023861	1.6223			ko:K01179 E3.2.1.4; endoglucanase [EC:3.2.1.4]	SMEL_003g177010.1	1.8947	0.92199	0.049192	1.3081			ko:K00422 E1.10.3.1; polyphenol oxidase [EC:1.10.3.1]	SMEL_008g312510.1	15.139	3.9202	0.016027	1.7951
	ko:K01179 E3.2.1.4; endoglucanase [EC:3.2.1.4]	SMEL_003g177010.1	1.3153	0.3954	0.049415	1.3061		Shoot_T1_67-3_vs_AM22	ko:K13679 WAXY; granule-bound starch synthase [EC:2.4.1.242]	SMEL_000g036450.1	4.2044	2.0719	0.02272	1.6436			C00296	Quinic acid	13.584	3.7638	0.00095836	3.0185
Shoot_T0_67-3_vs_AM22	ko:K01637 E4.1.3.1; isocitrate lyase [EC:4.1.3.1]	SMEL_007g288630.1	11.715	3.5503	0.024508	1.6107			ko:K00600 glyA; glycine hydroxymethyltransferase [EC:2.1.2.1]	SMEL_000g004730.1	1.3683	0.45234	0.039704	1.4012			C00095	D-Fructose	13.106	3.7122	0.021493	1.6677
Shoot_T0_305E40_vs_AM222	ko:K00695 E2.4.1.13; sucrose synthase [EC:2.4.1.13]	SMEL_007g277290.1	0.71482	-0.48434	0.04309	1.3656		Shoot_T1_305E40_vs_AM222	ko:K03781 katE; catalase [EC:1.11.1.6]	SMEL_000g061370.1	0.66815	-0.58175	0.022721	1.6436			C00493	Shikimic acid	5.2499	2.3923	0.01113	1.9535
	ko:K03781 katE; catalase [EC:1.11.1.6]	SMEL_000g061370.1	0.65704	-0.60596	0.029112	1.5359			ko:K00026 MDH2; malate dehydrogenase [EC:1.1.1.37]	SMEL_003g193140.1	0.64185	-0.6397	0.033459	1.4755			ko:K10775 PAL; phenylalanine ammonia-lyase [EC:4.3.1.24]	SMEL_005g230690.1	4.5572	2.1882	0.043993	1.3566
	ko:K01179 E3.2.1.4; endoglucanase [EC:3.2.1.4]	SMEL_003g177010.1	0.47272	-1.081	0.045457	1.3424			ko:K00600 glyA; glycine hydroxymethyltransferase [EC:2.1.2.1]	SMEL_005g228290.1	0.54279	-0.88154	0.020282	1.6929			ko:K00695 E2.4.1.13; sucrose synthase [EC:2.4.1.13]	SMEL_007g277290.1	3.278	1.7128	0.019169	1.7174
Shoot_T0_67-3_vs_305E40	ko:K11517 HAO; (S)-2-hydroxy-acid oxidase [EC:1.1.3.15]	SMEL_004g202790.1	1.7747	0.82761	0.012468	1.9042			ko:K01179 E3.2.1.4; endoglucanase [EC:3.2.1.4]	SMEL_003g177010.1	0.52002	-0.94335	0.020282	1.6929			ko:K00847 E2.7.1.4; fructokinase [EC:2.7.1.4]	SMEL_006g265210.1	2.7353	1.4517	0.01113	1.9535
	DOWN-								ko:K01580 E4.1.1.15; glutamate decarboxylase [EC:4.1.1.15]	SMEL_001g150880.1	0.37018	-1.4337	0.022721	1.6436		Shoot_T2_305E40_vs_AM222	C00493	Shikimic acid	0.29817	-1.7458	0.03531	1.4521
Shoot_T0_305E40_vs_AM222	ko:K16055 TPS; trehalose 6-phosphate synthase/phosphatase [EC:2.4.1.15 3.1.3.12]	SMEL_001g151160.1	3.1461	1.6536	0.029112	1.5359			ko:K13679 WAXY; granule-bound starch synthase [EC:2.4.1.242]	SMEL_000g036450.1	0.27224	-1.877	0.020282	1.6929			C00296	Quinic acid	0.27896	-1.8419	0.03531	1.4521
	Unknown steroidal saponin	M1066T1069	2.6194	1.3892	0.00043239	3.3641		Shoot_T1_67-3_vs_305E40	ko:K13679 WAXY; granule-bound starch synthase [EC:2.4.1.242]	SMEL_000g036450.1	3.7068	1.8902	0.0069519	2.1579			ko:K00422 E1.10.3.1; polyphenol oxidase [EC:1.10.3.1]	SMEL_008g312510.1	0.1277	-2.9692	0.03531	1.4521
	ko:K19892 GN4; glucan endo-1,3-beta-glucosidase 4 [EC:3.2.1.39]	SMEL_001g152910.1	1.4625	0.54841	0.029112	1.5359			ko:K00600 glyA; glycine hydroxymethyltransferase [EC:2.1.2.1]	SMEL_005g228290.1	1.4892	0.57457	0.039252	1.4061		Shoot_T2_67-3_vs_AM22	C00095	D-Fructose	8.983	3.1672	0.0074416	2.1283
	Unsaturated unknown glycoalkaloid	M862T924	1.4462	0.53229	0.0024046	2.619			DOWN-								C00031	D-Glucose	6.0773	2.6034	0.0074416	2.1283
	Hydroxy dihydro solamargine	M887T705	1.4048	0.49032	0.0015339	2.8142		Shoot_T1_AM222_vs_AM22	Unsaturated malonyl furostanol type Saponin	M1118T1173	0.75519	-0.40509	0.0081937	2.0865			ko:K00695 E2.4.1.13; sucrose synthase [EC:2.4.1.13]	SMEL_007g277290.1	2.9275	1.5497	0.012302	1.91
	Hydroxy-solamargine isomer 1	M885T703	1.3636	0.44741	0.0017068	2.7678			Hydroxy malonyl solamargine	M971T749	0.71017	-0.49377	0.0050092	2.3002			ko:K00847 E2.7.1.4; fructokinase [EC:2.7.1.4]	SMEL_006g265210.1	2.6093	1.3837	0.012302	1.91
	Unsaturated malonyl furostanol type Saponin	M1118T1173	1.3222	0.40299	0.0034787	2.4586			unknow glycoalcaloids	M1003T1070	0.68836	-0.53876	0.0038224	2.4177			ko:K00600 glyA; glycine hydroxymethyltransferase [EC:2.1.2.1]	SMEL_005g228290.1	2.2869	1.1934	0.0074416	2.1283
	Hydroxy malonyl solamargine	M971T749	1.3209	0.40157	0.0046043	2.3368			Hydroxy malonyl solamargine isomer	M971T770	0.68758	-0.54039	0.0038224	2.4177			C00296	Quinic acid	2.2288	1.1563	0.0074416	2.1283
	Hydroxy malonyl solamargine isomer	M971T770	1.2914	0.36898	0.0046043	2.3368			Unsaturated malonyl solamargine	M952T757	0.6818	-0.55257	0.00433	2.3635			ko:K01681 ACO; aconitate hydratase [EC:4.2.1.3]	SMEL_007g288510.1	2.22	1.1506	0.010353	1.9849
	Unsaturated malonyl solamargine	M952T757	1.2856	0.36246	0.0046043	2.3368			Hydroxy-solamargine isomer 1	M885T703	0.6534	-0.61396	0.0038224	2.4177			ko:K02437 gcvH; glycine cleavage system H protein	SMEL_000g091530.1	2.0713	1.0506	0.049323	1.3069
	unknown glycoalkaloid	M1003T1070	1.1867	0.247	0.034406	1.4634			Hydroxy dihydro solamargine	M887T705	0.6479	-0.62615	0.0038224	2.4177			ko:K00382 DLD; dihydrolipoamide dehydrogenase [EC:1.8.1.4]	SMEL_005g239330.1	2.0527	1.0375	0.030057	1.5221
Shoot_T0_67-3_vs_305E40	Hydroxy dihydro solamargine	M887T705	0.71254	-0.48896	0.0096456	2.0157			Unsaturated unknown glycoalkaloid	M862T924	0.63713	-0.65034	0.0038224	2.4177		Shoot_T2_67-3_vs_305E40	C00037	Glycine	3.775	1.9165	0.0027842	2.5553
	Unsaturated unknown glycoalkaloid	M862T924	0.70928	-0.49557	0.0096456	2.0157			ko:K00026 MDH2; malate dehydrogenase [EC:1.1.1.37]	SMEL_003g193140.1	0.59878	-0.73989	0.049192	1.3081			ko:K01681 ACO; aconitate hydratase [EC:4.2.1.3]	SMEL_007g288510.1	1.7967	0.84537	0.036652	1.4359
	Hydroxy-solamargine isomer 1	M885T703	0.69051	-0.53426	0.0091311	2.0395			ko:K00847 E2.7.1.4; fructokinase [EC:2.7.1.4]	SMEL_006g265210.1	0.59144	-0.75769	0.049192	1.3081			unknow glycoalkaloid	M1003T1070	1.51	0.59453	0.02222	1.6533
	Unknown steroidal saponin	M1066T1069	0.66481	-0.58899	0.0081096	2.091			ko:K15919 HPR2_3; glyoxylate/hydroxypyruvate reductase [EC:1.1.1.79 1.1.1.81]	SMEL_003g199000.1	0.58055	-0.78451	0.0051049	2.292			DOWN-
	Hydroxy malonyl solamargine isomer	M971T770	0.64273	-0.63772	0.0081096	2.091			ko:K00422 E1.10.3.1; polyphenol oxidase [EC:1.10.3.1]	SMEL_000g064350.1	0.56408	-0.82603	0.0051049	2.292		Shoot_T2_AM222_vs_AM22	ko:K13679 WAXY; granule-bound starch synthase [EC:2.4.1.242]	SMEL_000g036450.1	1.9877	0.99111	0.019149	1.7179
	Unsaturated malonyl solamargine	M952T757	0.62691	-0.67366	0.0081096	2.091			ko:K01681 ACO; aconitate hydratase [EC:4.2.1.3]	SMEL_007g288510.1	0.56203	-0.83129	0.044983	1.3469			ko:K00600 glyA; glycine hydroxymethyltransferase [EC:2.1.2.1]	SMEL_005g228290.1	1.8434	0.88241	0.00095836	3.0185
	Hydroxy malonyl solamargine	M971T749	0.62345	-0.68166	0.0081096	2.091			ko:K00133 asd; aspartate-semialdehyde dehydrogenase [EC:1.2.1.11]	SMEL_001g151200.1	0.54271	-0.88174	0.049192	1.3081			ko:K01179 E3.2.1.4; endoglucanase [EC:3.2.1.4]	SMEL_003g177010.1	1.7268	0.78812	0.019169	1.7174
	Unsaturated malonyl furostanol type Saponin	M1118T1173	0.59549	-0.74785	0.0081096	2.091			ko:K01647 CS; citrate synthase [EC:2.3.3.1]	SMEL_001g134630.1	0.52499	-0.92963	0.01127	1.9481			ko:K11517 HAO; (S)-2-hydroxy-acid oxidase [EC:1.1.3.15]	SMEL_007g292380.1	0.80633	-0.31055	0.038056	1.4196
	ko:K00695 E2.4.1.13; sucrose synthase [EC:2.4.1.13]	SMEL_012g382160.1	0.40367	-1.3087	0.018042	1.7437			ko:K01872 AARS; alanyl-tRNA synthetase [EC:6.1.1.7]	SMEL_001g115360.1	0.42232	-1.2436	0.014279	1.8453			ko:K01872 AARS; alanyl-tRNA synthetase [EC:6.1.1.7]	SMEL_001g115360.1	0.67396	-0.56926	0.043993	1.3566
Shoot_T0_67-3_vs_AM22	ko:K10775 PAL; phenylalanine ammonia-lyase [EC:4.3.1.24]	SMEL_005g230690.1	0.39951	-1.3237	0.024508	1.6107			ko:K01876 DARS2; aspartyl-tRNA synthetase [EC:6.1.1.12]	SMEL_000g033540.1	0.41096	-1.2829	0.02424	1.6155			ko:K11517 HAO; (S)-2-hydroxy-acid oxidase [EC:1.1.3.15]	SMEL_004g202790.1	0.48456	-1.0453	0.043993	1.3566
	Unsaturated malonyl solamargine	M952T757	0.68605	-0.54361	0.024508	1.6107			Unknown steroidal saponin	M1066T1069	0.38384	-1.3814	0.0038224	2.4177			ko:K01637 E4.1.3.1; isocitrate lyase [EC:4.1.3.1]	SMEL_007g288630.1	0.30277	-1.7237	0.027083	1.5673
	Hydroxy malonyl solamargine	M971T749	0.7084	-0.49737	0.024508	1.6107			C00089	Sucrose	0.20132	-2.3125	0.027855	1.5551			C00122	Fumaric acid	0.24937	-2.0037	0.037405	1.4271
	Hydroxy malonyl solamargine isomer	M971T770	0.71108	-0.49193	0.024508	1.6107		Shoot_T1_67-3_vs_AM22	unknow glycoalkaloids	M1003T1070	0.69662	-0.52155	0.0049804	2.3027		Shoot_T2_305E40_vs_AM222	ko:K11517 HAO; (S)-2-hydroxy-acid oxidase [EC:1.1.3.15]	SMEL_007g292380.1	1.3793	0.46394	0.03531	1.4521
	Unsaturated malonyl furostanol type Saponin	M1118T1173	0.74314	-0.4283	0.024508	1.6107			ko:K00281 GLDC; glycine dehydrogenase [EC:1.4.4.2]	SMEL_008g307820.1	0.69115	-0.53293	0.027546	1.5599		Shoot_T2_67-3_vs_AM22	ko:K00975 glgC; glucose-1-phosphate adenylyltransferase [EC:2.7.7.27]	SMEL_007g292070.1	1.9383	0.95481	0.025805	1.5883
	Hydroxy-solamargine isomer 1	M885T703	0.75065	-0.41378	0.031899	1.4962			Unknown steroidal saponin	M1066T1069	0.59488	-0.74933	0.001018	2.9923			ko:K00025 MDH1; malate dehydrogenase [EC:1.1.1.37]	SMEL_009g332450.1	1.847	0.88521	0.013927	1.8561
	ko:K01193 INV; beta-fructofuranosidase [EC:3.2.1.26]	SMEL_003g180470.1	0.43888	-1.1881	0.04569	1.3402			Hydroxy dihydro solamargine	M887T705	0.59405	-0.75134	0.0011189	2.9512			ko:K13679 WAXY; granule-bound starch synthase [EC:2.4.1.242]	SMEL_000g036450.1	1.7037	0.76869	0.012302	1.91
	C00493	Shikimic acid	0.29544	-1.7591	0.04926	1.3075			Unsaturated unknown glycoalkaloid	M862T924	0.58628	-0.77034	0.0011189	2.9512			C00493	Shikimic acid	1.6933	0.75981	0.031702	1.4989
Shoot_T0_AM222_vs_AM22	unknown glycoalkaloid	M1003T1070	0.86318	-0.21226	0.044703	1.3497			Hydroxy-solamargine isomer 1	M885T703	0.56121	-0.83339	0.001018	2.9923			ko:K00026 MDH2; malate dehydrogenase [EC:1.1.1.37]	SMEL_003g193140.1	1.6917	0.75851	0.049323	1.3069
	Hydroxy malonyl solamargine	M971T749	0.86018	-0.21729	0.02328	1.633			Unsaturated malonyl furostanol type Saponin	M1118T1173	0.53817	-0.89388	0.0011189	2.9512			ko:K01179 E3.2.1.4; endoglucanase [EC:3.2.1.4]	SMEL_003g177010.1	1.4988	0.58378	0.049323	1.3069
	Hydroxy malonyl solamargine isomer	M971T770	0.85667	-0.22318	0.037983	1.4204			Hydroxy malonyl solamargine	M971T749	0.52475	-0.93031	0.0010864	2.964			unknow glycoalkaloid	M1003T1070	1.3133	0.39319	0.046215	1.3352
	Unsaturated malonyl solamargine	M952T757	0.85121	-0.23241	0.035466	1.4502			Hydroxy malonyl solamargine isomer	M971T770	0.52028	-0.94265	0.001018	2.9923			Unsaturated malonyl furostanol type Saponin	M1118T1173	1.2856	0.3624	0.046215	1.3352
	Hydroxy dihydro solamargine	M887T705	0.80319	-0.31618	0.02328	1.633			ko:K00847 E2.7.1.4; fructokinase [EC:2.7.1.4]	SMEL_006g265210.1	0.51115	-0.96817	0.027546	1.5599			Unsaturated unknown glycoalkaloid	M862T924	1.2383	0.30839	0.049323	1.3069
	Unsaturated unknown glycoalkaloid	M862T924	0.79848	-0.32468	0.023861	1.6223			Unsaturated malonyl solamargine	M952T757	0.49833	-1.0048	0.001018	2.9923			ko:K01602 rbcS; ribulose-bisphosphate carboxylase small chain [EC:4.1.1.39]	SMEL_000g029880.1	0.91832	-0.12293	0.049323	1.3069
	Hydroxy-solamargine isomer 1	M885T703	0.79723	-0.32693	0.02328	1.633			ko:K01876 DARS2; aspartyl-tRNA synthetase [EC:6.1.1.12]	SMEL_000g033540.1	0.38745	-1.3679	0.0079378	2.1003			ko:K11517 HAO; (S)-2-hydroxy-acid oxidase [EC:1.1.3.15]	SMEL_007g292380.1	0.76274	-0.39074	0.049323	1.3069
	ko:K00600 glyA; glycine hydroxymethyltransferase [EC:2.1.2.1]	SMEL_000g004730.1	0.65877	-0.60215	0.02328	1.633			ko:K00764 purF; amidophosphoribosyltransferase [EC:2.4.2.14]	SMEL_001g116660.1	0.3835	-1.3827	0.0058994	2.2292			ko:K00281 GLDC; glycine dehydrogenase [EC:1.4.4.2]	SMEL_008g307820.1	0.61001	-0.71309	0.0074416	2.1283
	ko:K10775 PAL; phenylalanine ammonia-lyase [EC:4.3.1.24]	SMEL_005g230690.1	0.54442	-0.87722	0.044703	1.3497			ko:K01872 AARS; alanyl-tRNA synthetase [EC:6.1.1.7]	SMEL_001g115360.1	0.37094	-1.4307	0.02469	1.6075			ko:K00764 purF; amidophosphoribosyltransferase [EC:2.4.2.14]	SMEL_001g116660.1	0.55308	-0.85443	0.02488	1.6042
	Unknown steroidal saponin	M1066T1069	0.50754	-0.9784	0.00083667	3.0774			ko:K00133 asd; aspartate-semialdehyde dehydrogenase [EC:1.2.1.11]	SMEL_001g151200.1	0.33888	-1.5611	0.010644	1.9729			ko:K03781 katE; catalase [EC:1.11.1.6]	SMEL_000g061370.1	0.51721	-0.95119	0.0074416	2.1283
	ko:K01193 INV; beta-fructofuranosidase [EC:3.2.1.26]	SMEL_003g180470.1	0.35712	-1.4855	0.049415	1.3061			ko:K17761 SSADH; succinate-semialdehyde dehydrogenase, mitochondrial [EC:1.2.1.24]	SMEL_009g333060.1	0.26909	-1.8938	0.021462	1.6683			C00065	L-Serine	0.36305	-1.4618	0.049323	1.3069
	ko:K00422 E1.10.3.1; polyphenol oxidase [EC:1.10.3.1]	SMEL_000g064350.1	0.21088	-2.2455	0.023861	1.6223			C00089	Sucrose	0.18161	-2.461	0.02243	1.6492			C00041	L-Alanine	0.24444	-2.0324	0.046215	1.3352
								Shoot_T1_305E40_vs_AM222	C00041	L-Alanine	2.6722	1.418	0.0098815	2.0052			ko:K00422 E1.10.3.1; polyphenol oxidase [EC:1.10.3.1]	SMEL_000g064350.1	0.19561	-2.354	0.030057	1.5221
									Unknown steroidal saponin	M1066T1069	2.263	1.1782	0.019379	1.7127		Shoot_T2_67-3_vs_305E40	ko:K00830 AGXT; alanine-glyoxylate transaminase / serine-glyoxylate transaminase / serine-pyruvate transaminase [EC:2.6.1.44 2.6.1.45 2.6.1.51]	SMEL_005g242150.1	0.69678	-0.52122	0.036652	1.4359
									ko:K16055 TPS; trehalose 6-phosphate synthase/phosphatase [EC:2.4.1.15 3.1.3.12]	SMEL_001g151160.1	1.9853	0.98937	0.022721	1.6436			ko:K11517 HAO; (S)-2-hydroxy-acid oxidase [EC:1.1.3.15]	SMEL_007g292380.1	0.68581	-0.54412	0.036652	1.4359
									ko:K00695 E2.4.1.13; sucrose synthase [EC:2.4.1.13]	SMEL_012g382160.1	1.7648	0.81951	0.032818	1.4839			ko:K03781 katE; catalase [EC:1.11.1.6]	SMEL_000g061370.1	0.55147	-0.85864	0.0027842	2.5553
									ko:K01872 AARS; alanyl-tRNA synthetase [EC:6.1.1.7]	SMEL_001g115360.1	1.7557	0.81201	0.022721	1.6436			ko:K00281 GLDC; glycine dehydrogenase [EC:1.4.4.2]	SMEL_008g307820.1	0.53775	-0.895	0.0027842	2.5553
									ko:K01681 ACO; aconitate hydratase [EC:4.2.1.3]	SMEL_007g288510.1	1.5888	0.66794	0.022721	1.6436			C00041	L-Alanine	0.41928	-1.254	0.0018186	2.7403
									ko:K00830 AGXT; alanine-glyoxylate transaminase / serine-glyoxylate transaminase / serine-pyruvate transaminase [EC:2.6.1.44 2.6.1.45 2.6.1.51]	SMEL_005g242150.1	1.5772	0.65733	0.032818	1.4839			C00258	Glyceric acid	0.081077	-3.6246	0.0045847	2.3387
									ko:K00281 GLDC; glycine dehydrogenase [EC:1.4.4.2]	SMEL_008g307820.1	1.529	0.61257	0.032818	1.4839
									ko:K15919 HPR2_3; glyoxylate/hydroxypyruvate reductase [EC:1.1.1.79 1.1.1.81]	SMEL_003g199000.1	1.5172	0.60138	0.022721	1.6436
									Unsaturated unknown glycoalkaloid	M862T924	1.2789	0.35496	0.02259	1.6461
									Hydroxy dihydro solamargine	M887T705	1.254	0.32652	0.020282	1.6929
									Hydroxy-solamargine isomer 1	M885T703	1.2306	0.29936	0.022721	1.6436
									Unsaturated malonyl furostanol type Saponin	M1118T1173	1.1743	0.23178	0.032818	1.4839
									Hydroxy malonyl solamargine isomer	M971T770	1.1653	0.22066	0.032818	1.4839
									Hydroxy malonyl solamargine	M971T749	1.1649	0.22022	0.032818	1.4839
									Unsaturated malonyl solamargine	M952T757	1.1511	0.20299	0.038341	1.4163
								Shoot_T1_67-3_vs_305E40	Hydroxy dihydro solamargine	M887T705	0.73117	-0.45171	0.0069519	2.1579
									Unsaturated unknown glycoalkaloid	M862T924	0.71949	-0.47495	0.0069519	2.1579
									Hydroxy-solamargine isomer 1	M885T703	0.69795	-0.5188	0.0040033	2.3976
									Unknown steroidal saponin	M1066T1069	0.68486	-0.54611	0.0036223	2.441
									ko:K00281 GLDC; glycine dehydrogenase [EC:1.4.4.2]	SMEL_008g307820.1	0.65803	-0.60377	0.014204	1.8476
									Hydroxy malonyl solamargine isomer	M971T770	0.64935	-0.62292	0.0036223	2.441
									ko:K01593 DDC; aromatic-L-amino-acid/L-tryptophan decarboxylase [EC:4.1.1.28 4.1.1.105]	SMEL_009g325840.1	0.63679	-0.65112	0.0037058	2.4311
									Unsaturated malonyl solamargine	M952T757	0.63497	-0.65524	0.0036223	2.441
									Hydroxy malonyl solamargine	M971T749	0.6343	-0.65677	0.0036223	2.441
									Unsaturated malonyl furostanol type Saponin	M1118T1173	0.60686	-0.72057	0.0036223	2.441
									ko:K16055 TPS; trehalose 6-phosphate synthase/phosphatase [EC:2.4.1.15 3.1.3.12]	SMEL_001g151160.1	0.55162	-0.85826	0.028795	1.5407
									ko:K01872 AARS; alanyl-tRNA synthetase [EC:6.1.1.7]	SMEL_001g115360.1	0.50029	-0.99915	0.04776	1.3209
									ko:K01637 E4.1.3.1; isocitrate lyase [EC:4.1.3.1]	SMEL_007g288630.1	0.35588	-1.4906	0.038374	1.416
									C00041	L-Alanine	0.34281	-1.5445	0.039252	1.4061
									ko:K17761 SSADH; succinate-semialdehyde dehydrogenase, mitochondrial [EC:1.2.1.24]	SMEL_009g333060.1	0.31891	-1.6488	0.038374	1.416
									ko:K00422 E1.10.3.1; polyphenol oxidase [EC:1.10.3.1]	SMEL_008g312510.1	0.31636	-1.6604	0.04776	1.3209
